# Supplementary material for: Polar pattern formation induced by contact following locomotion in a multicellular system
Source: eLife. 2020 Apr 30;9:e53609. doi: 10.7554/eLife.53609 (PMC7213982; doi:10.7554/eLife.53609)
Supplement: Figure 1—source data 1. — This file contains width, traveling speed, average cell speeds inside and outside of the bands, order parameter value and number of trajectories analyzed of 10 independent experiments. [file elife-53609-fig1-data1.xlsx]

## Sheet: Sheet1
	Data ID	W	vb	<vin>	<vout>	<phi>	N
	1	340	0.548913	0.380298	0.308485	0.739	35
	2	244	0.484475	0.375216	0.335867	0.6469	19
	3	702	0.480299	0.377905	0.327083	0.8439	34
	4	445	0.506497	0.384183	0.277963	0.7222	12
	5	255	0.456678	0.351619	0.307389	0.6806	13
	6	306	0.55163	0.379373	0.311583	0.7689	17
	7	204	0.484475	0.389487	0.322616	0.6971	19
	8	419	0.506497	0.400055	0.363493	0.8064	16
	9	408	0.484475	0.37532	0.331814	0.772	18
	10	442	0.474167	0.439416	0.383955	0.8125	7
