# Supplementary material for: Polar pattern formation induced by contact following locomotion in a multicellular system
Source: eLife. 2020 Apr 30;9:e53609. doi: 10.7554/eLife.53609 (PMC7213982; doi:10.7554/eLife.53609)
Supplement: Figure 2—source data 1. [file elife-53609-fig2-data1.csv]

cell1			cell2			cell3			cell4			cell5			cell6			cell7			cell8			cell9			cell10			cell11			cell12			cell13			cell14			cell15			cell16			cell17
t	x	y	t	x	y	t	x	y	t	x	y	t	x	y	t	x	y	t	x	y	t	x	y	t	x	y	t	x	y	t	x	y	t	x	y	t	x	y	t	x	y	t	x	y	t	x	y	t	x
0.00E+00	6.97E+02	2.25E+01	0.00E+00	1.36E+03	3.71E+01	0.00E+00	5.14E+02	6.18E+01	0.00E+00	2.81E+02	1.09E+02	0.00E+00	2.68E+01	1.13E+02	0.00E+00	1.45E+03	1.16E+02	0.00E+00	7.50E+02	1.16E+02	0.00E+00	3.79E+02	1.18E+02	0.00E+00	6.93E+02	1.21E+02	0.00E+00	6.54E+02	1.41E+02	0.00E+00	6.48E+02	1.56E+02	0.00E+00	1.08E+03	1.88E+02	0.00E+00	6.83E+02	1.96E+02	0.00E+00	5.81E+02	2.23E+02	0.00E+00	1.18E+03	2.55E+02	0.00E+00	1.40E+03	2.76E+02	0.00E+00	1.60E+03
1.50E+01	7.01E+02	3.21E+01	1.50E+01	1.36E+03	4.40E+01	1.50E+01	5.10E+02	6.59E+01	1.50E+01	2.81E+02	1.09E+02	1.50E+01	2.42E+01	1.08E+02	1.50E+01	1.46E+03	1.13E+02	1.50E+01	7.55E+02	1.25E+02	1.50E+01	3.85E+02	1.17E+02	1.50E+01	6.88E+02	1.29E+02	1.50E+01	6.51E+02	1.37E+02	1.50E+01	6.41E+02	1.60E+02	1.50E+01	1.07E+03	1.84E+02	1.50E+01	6.86E+02	1.95E+02	1.50E+01	5.81E+02	2.15E+02	1.50E+01	1.18E+03	2.59E+02	1.50E+01	1.40E+03	2.79E+02	1.50E+01	1.60E+03
3.00E+01	7.01E+02	4.29E+01	3.00E+01	1.36E+03	5.05E+01	3.00E+01	5.06E+02	7.45E+01	3.00E+01	2.81E+02	1.10E+02	3.00E+01	2.75E+01	1.04E+02	3.00E+01	1.47E+03	1.10E+02	3.00E+01	7.56E+02	1.32E+02	3.00E+01	3.89E+02	1.18E+02	3.00E+01	6.86E+02	1.37E+02	3.00E+01	6.51E+02	1.37E+02	3.00E+01	6.36E+02	1.64E+02	3.00E+01	1.06E+03	1.94E+02	3.00E+01	6.90E+02	1.94E+02	3.00E+01	5.84E+02	2.08E+02	3.00E+01	1.18E+03	2.61E+02	3.00E+01	1.40E+03	2.77E+02	3.00E+01	1.60E+03
4.50E+01	6.95E+02	4.86E+01	4.50E+01	1.35E+03	5.60E+01	4.50E+01	5.05E+02	7.88E+01	4.50E+01	2.81E+02	1.10E+02	4.50E+01	2.93E+01	1.02E+02	4.50E+01	1.47E+03	1.04E+02	4.50E+01	7.51E+02	1.40E+02	4.50E+01	3.91E+02	1.14E+02	4.50E+01	6.84E+02	1.40E+02	4.50E+01	6.47E+02	1.36E+02	4.50E+01	6.32E+02	1.61E+02	4.50E+01	1.07E+03	2.03E+02	4.50E+01	6.90E+02	1.96E+02	4.50E+01	5.86E+02	2.06E+02	4.50E+01	1.18E+03	2.66E+02	4.50E+01	1.41E+03	2.70E+02	4.50E+01	1.60E+03
6.00E+01	6.93E+02	5.00E+01	6.00E+01	1.35E+03	6.00E+01	6.00E+01	5.04E+02	8.79E+01	6.00E+01	2.81E+02	1.10E+02	6.00E+01	3.06E+01	9.96E+01	6.00E+01	1.48E+03	1.02E+02	6.00E+01	7.52E+02	1.43E+02	6.00E+01	3.93E+02	1.11E+02	6.00E+01	6.84E+02	1.40E+02	6.00E+01	6.46E+02	1.35E+02	6.00E+01	6.29E+02	1.57E+02	6.00E+01	1.06E+03	2.11E+02	6.00E+01	6.93E+02	1.96E+02	6.00E+01	5.86E+02	2.06E+02	6.00E+01	1.17E+03	2.71E+02	6.00E+01	1.41E+03	2.67E+02	6.00E+01	1.60E+03
7.50E+01	6.84E+02	5.10E+01	7.50E+01	1.34E+03	6.52E+01	7.50E+01	5.04E+02	9.58E+01	7.50E+01	2.85E+02	1.10E+02	7.50E+01	3.31E+01	9.65E+01	7.50E+01	1.48E+03	1.05E+02	7.50E+01	7.58E+02	1.46E+02	7.50E+01	3.94E+02	1.13E+02	7.50E+01	6.84E+02	1.41E+02	7.50E+01	6.45E+02	1.34E+02	7.50E+01	6.25E+02	1.53E+02	7.50E+01	1.06E+03	2.18E+02	7.50E+01	6.97E+02	1.93E+02	7.50E+01	5.87E+02	2.06E+02	7.50E+01	1.18E+03	2.74E+02	7.50E+01	1.42E+03	2.63E+02	7.50E+01	1.60E+03
9.00E+01	6.75E+02	5.19E+01	9.00E+01	1.34E+03	6.91E+01	9.00E+01	5.08E+02	1.03E+02	9.00E+01	2.85E+02	1.11E+02	9.00E+01	3.50E+01	9.43E+01	9.00E+01	1.49E+03	1.06E+02	9.00E+01	7.61E+02	1.46E+02	9.00E+01	3.95E+02	1.12E+02	9.00E+01	6.84E+02	1.41E+02	9.00E+01	6.40E+02	1.38E+02	9.00E+01	6.17E+02	1.50E+02	9.00E+01	1.06E+03	2.23E+02	9.00E+01	6.97E+02	1.89E+02	9.00E+01	5.89E+02	2.06E+02	9.00E+01	1.18E+03	2.74E+02	9.00E+01	1.42E+03	2.61E+02	9.00E+01	1.60E+03
1.05E+02	6.68E+02	5.48E+01	1.05E+02	1.35E+03	7.37E+01	1.05E+02	5.13E+02	1.11E+02	1.05E+02	2.82E+02	1.09E+02	1.05E+02	3.71E+01	9.42E+01	1.05E+02	1.49E+03	1.04E+02	1.05E+02	7.68E+02	1.46E+02	1.05E+02	3.95E+02	1.10E+02	1.05E+02	6.86E+02	1.42E+02	1.05E+02	6.39E+02	1.43E+02	1.05E+02	6.11E+02	1.49E+02	1.05E+02	1.06E+03	2.26E+02	1.05E+02	6.94E+02	1.84E+02	1.05E+02	5.89E+02	2.05E+02	1.05E+02	1.18E+03	2.72E+02	1.05E+02	1.42E+03	2.59E+02	1.05E+02	1.59E+03
1.20E+02	6.67E+02	6.43E+01	1.20E+02	1.35E+03	7.73E+01	1.20E+02	5.13E+02	1.20E+02	1.20E+02	2.83E+02	1.10E+02	1.20E+02	3.96E+01	9.26E+01	1.20E+02	1.50E+03	1.00E+02	1.20E+02	7.75E+02	1.48E+02	1.20E+02	3.96E+02	1.09E+02	1.20E+02	6.85E+02	1.41E+02	1.20E+02	6.35E+02	1.45E+02	1.20E+02	6.07E+02	1.48E+02	1.20E+02	1.06E+03	2.26E+02	1.20E+02	6.94E+02	1.77E+02	1.20E+02	5.88E+02	2.04E+02	1.20E+02	1.18E+03	2.66E+02	1.20E+02	1.42E+03	2.62E+02	1.20E+02	1.59E+03
1.35E+02	6.62E+02	6.87E+01	1.35E+02	1.35E+03	7.56E+01	1.35E+02	5.13E+02	1.26E+02	1.35E+02	2.82E+02	1.11E+02	1.35E+02	4.46E+01	9.13E+01	1.35E+02	1.50E+03	9.53E+01	1.35E+02	7.82E+02	1.48E+02	1.35E+02	3.93E+02	1.08E+02	1.35E+02	6.86E+02	1.42E+02	1.35E+02	6.30E+02	1.49E+02	1.35E+02	6.06E+02	1.44E+02	1.35E+02	1.06E+03	2.26E+02	1.35E+02	6.96E+02	1.78E+02	1.35E+02	5.89E+02	2.04E+02	1.35E+02	1.19E+03	2.63E+02	1.35E+02	1.42E+03	2.63E+02	1.35E+02	1.58E+03
1.50E+02	6.54E+02	6.80E+01	1.50E+02	1.36E+03	6.99E+01	1.50E+02	5.11E+02	1.32E+02	1.50E+02	2.84E+02	1.12E+02	1.50E+02	4.72E+01	9.00E+01	1.50E+02	1.50E+03	8.81E+01	1.50E+02	7.93E+02	1.45E+02	1.50E+02	3.94E+02	1.08E+02	1.50E+02	6.86E+02	1.41E+02	1.50E+02	6.26E+02	1.52E+02	1.50E+02	6.11E+02	1.33E+02	1.50E+02	1.06E+03	2.26E+02	1.50E+02	7.03E+02	1.80E+02	1.50E+02	5.88E+02	2.05E+02	1.50E+02	1.19E+03	2.58E+02	1.50E+02	1.42E+03	2.65E+02	1.50E+02	1.58E+03
1.65E+02	6.48E+02	7.06E+01	1.65E+02	1.36E+03	6.28E+01	1.65E+02	5.05E+02	1.37E+02	1.65E+02	2.84E+02	1.12E+02	1.65E+02	4.86E+01	9.15E+01	1.65E+02	1.50E+03	8.71E+01	1.65E+02	8.02E+02	1.47E+02	1.65E+02	3.94E+02	1.08E+02	1.65E+02	6.88E+02	1.41E+02	1.65E+02	6.22E+02	1.54E+02	1.65E+02	6.17E+02	1.28E+02	1.65E+02	1.06E+03	2.26E+02	1.65E+02	7.11E+02	1.81E+02	1.65E+02	5.77E+02	2.08E+02	1.65E+02	1.19E+03	2.56E+02	1.65E+02	1.42E+03	2.68E+02	1.65E+02	1.59E+03
1.80E+02	6.44E+02	7.26E+01	1.80E+02	1.36E+03	5.54E+01	1.80E+02	5.00E+02	1.45E+02	1.80E+02	2.83E+02	1.12E+02	1.80E+02	4.85E+01	9.25E+01	1.80E+02	1.50E+03	8.52E+01	1.80E+02	8.08E+02	1.44E+02	1.80E+02	3.94E+02	1.08E+02	1.80E+02	6.87E+02	1.41E+02	1.80E+02	6.18E+02	1.57E+02	1.80E+02	6.22E+02	1.29E+02	1.80E+02	1.06E+03	2.27E+02	1.80E+02	7.15E+02	1.79E+02	1.80E+02	5.71E+02	2.09E+02	1.80E+02	1.19E+03	2.54E+02	1.80E+02	1.43E+03	2.68E+02	1.80E+02	1.59E+03
1.95E+02	6.44E+02	7.47E+01	1.95E+02	1.37E+03	4.89E+01	1.95E+02	4.98E+02	1.54E+02	1.95E+02	2.83E+02	1.12E+02	1.95E+02	5.08E+01	9.43E+01	1.95E+02	1.50E+03	8.18E+01	1.95E+02	8.14E+02	1.47E+02	1.95E+02	3.94E+02	1.08E+02	1.95E+02	6.86E+02	1.41E+02	1.95E+02	6.12E+02	1.61E+02	1.95E+02	6.26E+02	1.28E+02	1.95E+02	1.06E+03	2.29E+02	1.95E+02	7.19E+02	1.71E+02	1.95E+02	5.68E+02	2.08E+02	1.95E+02	1.19E+03	2.50E+02	1.95E+02	1.43E+03	2.68E+02	1.95E+02	1.60E+03
2.10E+02	6.44E+02	7.46E+01	2.10E+02	1.37E+03	4.79E+01	2.10E+02	4.96E+02	1.60E+02	2.10E+02	2.84E+02	1.12E+02	2.10E+02	5.61E+01	9.44E+01	2.10E+02	1.50E+03	7.58E+01	2.10E+02	8.17E+02	1.48E+02	2.10E+02	3.94E+02	1.07E+02	2.10E+02	6.90E+02	1.40E+02	2.10E+02	6.08E+02	1.65E+02	2.10E+02	6.34E+02	1.32E+02	2.10E+02	1.06E+03	2.28E+02	2.10E+02	7.22E+02	1.62E+02	2.10E+02	5.67E+02	2.02E+02	2.10E+02	1.20E+03	2.46E+02	2.10E+02	1.43E+03	2.66E+02	2.10E+02	1.60E+03
2.25E+02	6.46E+02	7.36E+01	2.25E+02	1.37E+03	4.75E+01	2.25E+02	4.96E+02	1.68E+02	2.25E+02	2.83E+02	1.11E+02	2.25E+02	5.69E+01	9.40E+01	2.25E+02	1.50E+03	7.19E+01	2.25E+02	8.23E+02	1.43E+02	2.25E+02	3.93E+02	1.04E+02	2.25E+02	6.94E+02	1.49E+02	2.25E+02	6.02E+02	1.66E+02	2.25E+02	6.39E+02	1.31E+02	2.25E+02	1.06E+03	2.27E+02	2.25E+02	7.28E+02	1.58E+02	2.25E+02	5.61E+02	2.00E+02	2.25E+02	1.20E+03	2.46E+02	2.25E+02	1.43E+03	2.62E+02	2.25E+02	1.60E+03
2.40E+02	6.46E+02	7.12E+01	2.40E+02	1.37E+03	4.76E+01	2.40E+02	4.97E+02	1.70E+02	2.40E+02	2.83E+02	1.12E+02	2.40E+02	5.66E+01	9.33E+01	2.40E+02	1.50E+03	6.77E+01	2.40E+02	8.28E+02	1.35E+02	2.40E+02	3.92E+02	1.02E+02	2.40E+02	6.95E+02	1.52E+02	2.40E+02	5.99E+02	1.62E+02	2.40E+02	6.40E+02	1.33E+02	2.40E+02	1.06E+03	2.27E+02	2.40E+02	7.33E+02	1.58E+02	2.40E+02	5.54E+02	1.98E+02	2.40E+02	1.20E+03	2.45E+02	2.40E+02	1.43E+03	2.60E+02	2.40E+02	1.60E+03
2.55E+02	6.45E+02	6.63E+01	2.55E+02	1.37E+03	4.83E+01	2.55E+02	5.00E+02	1.71E+02	2.55E+02	2.84E+02	1.12E+02	2.55E+02	5.64E+01	9.35E+01	2.55E+02	1.50E+03	6.27E+01	2.55E+02	8.36E+02	1.32E+02	2.55E+02	3.93E+02	1.02E+02	2.55E+02	6.94E+02	1.61E+02	2.55E+02	5.96E+02	1.61E+02	2.55E+02	6.40E+02	1.32E+02	2.55E+02	1.06E+03	2.27E+02	2.55E+02	7.33E+02	1.59E+02	2.55E+02	5.53E+02	1.92E+02	2.55E+02	1.20E+03	2.44E+02	2.55E+02	1.44E+03	2.57E+02	2.55E+02	1.61E+03
2.70E+02	6.44E+02	6.74E+01	2.70E+02	1.37E+03	5.19E+01	2.70E+02	5.08E+02	1.71E+02	2.70E+02	2.84E+02	1.11E+02	2.70E+02	5.67E+01	9.48E+01	2.70E+02	1.50E+03	5.60E+01	2.70E+02	8.42E+02	1.31E+02	2.70E+02	3.99E+02	9.87E+01	2.70E+02	6.95E+02	1.68E+02	2.70E+02	5.91E+02	1.64E+02	2.70E+02	6.39E+02	1.32E+02	2.70E+02	1.06E+03	2.26E+02	2.70E+02	7.37E+02	1.61E+02	2.70E+02	5.50E+02	1.87E+02	2.70E+02	1.21E+03	2.44E+02	2.70E+02	1.45E+03	2.55E+02	2.70E+02	1.60E+03
2.85E+02	6.44E+02	6.82E+01	2.85E+02	1.36E+03	4.82E+01	2.85E+02	5.12E+02	1.69E+02	2.85E+02	2.84E+02	1.11E+02	2.85E+02	5.85E+01	1.01E+02	2.85E+02	1.50E+03	4.96E+01	2.85E+02	8.52E+02	1.30E+02	2.85E+02	4.03E+02	9.22E+01	2.85E+02	6.95E+02	1.68E+02	2.85E+02	5.86E+02	1.63E+02	2.85E+02	6.39E+02	1.33E+02	2.85E+02	1.06E+03	2.26E+02	2.85E+02	7.44E+02	1.65E+02	2.85E+02	5.46E+02	1.85E+02	2.85E+02	1.21E+03	2.39E+02	2.85E+02	1.45E+03	2.54E+02	2.85E+02	1.60E+03
3.00E+02	6.44E+02	6.79E+01	3.00E+02	1.36E+03	4.68E+01	3.00E+02	5.17E+02	1.67E+02	3.00E+02	2.84E+02	1.10E+02	3.00E+02	5.80E+01	1.05E+02	3.00E+02	1.50E+03	4.54E+01	3.00E+02	8.61E+02	1.24E+02	3.00E+02	4.04E+02	8.81E+01	3.00E+02	6.93E+02	1.67E+02	3.00E+02	5.80E+02	1.63E+02	3.00E+02	6.38E+02	1.33E+02	3.00E+02	1.06E+03	2.23E+02	3.00E+02	7.49E+02	1.70E+02	3.00E+02	5.41E+02	1.85E+02	3.00E+02	1.21E+03	2.33E+02	3.00E+02	1.45E+03	2.55E+02	3.00E+02	1.60E+03
3.15E+02	6.44E+02	6.73E+01	3.15E+02	1.35E+03	4.86E+01	3.15E+02	5.20E+02	1.66E+02	3.15E+02	2.85E+02	1.08E+02	3.15E+02	5.61E+01	1.11E+02	3.15E+02	1.50E+03	4.09E+01	3.15E+02	8.60E+02	1.16E+02	3.15E+02	4.03E+02	8.80E+01	3.15E+02	6.90E+02	1.64E+02	3.15E+02	5.77E+02	1.60E+02	3.15E+02	6.38E+02	1.33E+02	3.15E+02	1.06E+03	2.22E+02	3.15E+02	7.49E+02	1.75E+02	3.15E+02	5.35E+02	1.84E+02	3.15E+02	1.21E+03	2.31E+02	3.15E+02	1.46E+03	2.54E+02	3.15E+02	1.60E+03
3.30E+02	6.44E+02	6.72E+01	3.30E+02	1.35E+03	4.85E+01	3.30E+02	5.24E+02	1.65E+02	3.30E+02	2.84E+02	1.07E+02	3.30E+02	5.89E+01	1.13E+02	3.30E+02	1.50E+03	3.58E+01	3.30E+02	8.58E+02	1.09E+02	3.30E+02	4.03E+02	8.59E+01	3.30E+02	6.90E+02	1.61E+02	3.30E+02	5.73E+02	1.56E+02	3.30E+02	6.36E+02	1.37E+02	3.30E+02	1.06E+03	2.22E+02	3.30E+02	7.48E+02	1.83E+02	3.30E+02	5.28E+02	1.83E+02	3.30E+02	1.22E+03	2.27E+02	3.30E+02	1.46E+03	2.49E+02	3.30E+02	1.60E+03
3.45E+02	6.44E+02	6.76E+01	3.45E+02	1.35E+03	4.96E+01	3.45E+02	5.28E+02	1.65E+02	3.45E+02	2.80E+02	1.03E+02	3.45E+02	5.91E+01	1.15E+02	3.45E+02	1.49E+03	3.02E+01	3.45E+02	8.53E+02	1.05E+02	3.45E+02	4.00E+02	8.46E+01	3.45E+02	6.88E+02	1.60E+02	3.45E+02	5.69E+02	1.54E+02	3.45E+02	6.32E+02	1.43E+02	3.45E+02	1.06E+03	2.20E+02	3.45E+02	7.44E+02	1.89E+02	3.45E+02	5.24E+02	1.83E+02	3.45E+02	1.22E+03	2.23E+02	3.45E+02	1.45E+03	2.45E+02	3.45E+02	1.60E+03
3.60E+02	6.44E+02	6.80E+01	3.60E+02	1.35E+03	5.09E+01	3.60E+02	5.33E+02	1.65E+02	3.60E+02	2.80E+02	1.03E+02	3.60E+02	5.77E+01	1.20E+02	3.60E+02	1.49E+03	2.86E+01	3.60E+02	8.47E+02	1.07E+02	3.60E+02	3.99E+02	8.20E+01	3.60E+02	6.86E+02	1.55E+02	3.60E+02	5.70E+02	1.50E+02	3.60E+02	6.28E+02	1.50E+02	3.60E+02	1.06E+03	2.22E+02	3.60E+02	7.40E+02	1.94E+02	3.60E+02	5.21E+02	1.81E+02	3.60E+02	1.21E+03	2.21E+02	3.60E+02	1.45E+03	2.40E+02	3.60E+02	1.59E+03
3.75E+02	6.45E+02	6.70E+01	3.75E+02	1.35E+03	5.44E+01	3.75E+02	5.38E+02	1.64E+02	3.75E+02	2.80E+02	1.04E+02	3.75E+02	5.93E+01	1.21E+02	3.75E+02	1.49E+03	2.26E+01	3.75E+02	8.41E+02	1.09E+02	3.75E+02	3.99E+02	7.73E+01	3.75E+02	6.84E+02	1.48E+02	3.75E+02	5.70E+02	1.46E+02	3.75E+02	6.27E+02	1.57E+02	3.75E+02	1.06E+03	2.21E+02	3.75E+02	7.40E+02	1.97E+02	3.75E+02	5.17E+02	1.78E+02	3.75E+02	1.21E+03	2.20E+02	3.75E+02	1.44E+03	2.36E+02	3.75E+02	1.58E+03
3.90E+02	6.45E+02	6.70E+01	3.90E+02	1.34E+03	6.25E+01	3.90E+02	5.43E+02	1.60E+02	3.90E+02	2.79E+02	1.04E+02	3.90E+02	6.18E+01	1.20E+02	3.90E+02	1.49E+03	1.53E+01	3.90E+02	8.31E+02	1.10E+02	3.90E+02	3.96E+02	7.60E+01	3.90E+02	6.81E+02	1.42E+02	3.90E+02	5.69E+02	1.45E+02	3.90E+02	6.25E+02	1.67E+02	3.90E+02	1.05E+03	2.20E+02	3.90E+02	7.43E+02	2.02E+02	3.90E+02	5.12E+02	1.73E+02	3.90E+02	1.21E+03	2.16E+02	3.90E+02	1.44E+03	2.35E+02	3.90E+02	1.58E+03
4.05E+02	6.46E+02	6.68E+01	4.05E+02	1.33E+03	6.43E+01	4.05E+02	5.45E+02	1.55E+02	4.05E+02	2.79E+02	1.04E+02	4.05E+02	6.42E+01	1.18E+02	4.05E+02	1.50E+03	8.14E+00	4.05E+02	8.25E+02	1.13E+02	4.05E+02	3.94E+02	7.68E+01	4.05E+02	6.79E+02	1.36E+02	4.05E+02	5.66E+02	1.43E+02	4.05E+02	6.22E+02	1.70E+02	4.05E+02	1.05E+03	2.19E+02	4.05E+02	7.44E+02	2.08E+02	4.05E+02	5.11E+02	1.69E+02	4.05E+02	1.21E+03	2.17E+02	4.05E+02	1.44E+03	2.33E+02	4.05E+02	1.58E+03
4.20E+02	6.46E+02	6.60E+01	4.20E+02	1.33E+03	6.49E+01	4.20E+02	5.46E+02	1.49E+02	4.20E+02	2.79E+02	1.04E+02	4.20E+02	6.85E+01	1.16E+02	4.20E+02	1.50E+03	2.07E+00	4.20E+02	8.23E+02	1.17E+02	4.20E+02	3.90E+02	7.54E+01	4.20E+02	6.77E+02	1.33E+02	4.20E+02	5.63E+02	1.39E+02	4.20E+02	6.18E+02	1.71E+02	4.20E+02	1.05E+03	2.16E+02	4.20E+02	7.45E+02	2.13E+02	4.20E+02	5.09E+02	1.65E+02	4.20E+02	1.21E+03	2.15E+02	4.20E+02	1.43E+03	2.33E+02	4.20E+02	1.57E+03
4.35E+02	6.46E+02	6.55E+01	4.35E+02	1.33E+03	6.92E+01	4.35E+02	5.50E+02	1.43E+02	4.35E+02	2.81E+02	1.03E+02	4.35E+02	7.32E+01	1.19E+02	4.35E+02	1.49E+03	1.57E+00	4.35E+02	8.24E+02	1.18E+02	4.35E+02	3.89E+02	7.14E+01	4.35E+02	6.77E+02	1.32E+02	4.35E+02	5.64E+02	1.38E+02	4.35E+02	6.14E+02	1.79E+02	4.35E+02	1.05E+03	2.14E+02	4.35E+02	7.45E+02	2.20E+02	4.35E+02	5.07E+02	1.58E+02	4.35E+02	1.22E+03	2.15E+02	4.35E+02	1.43E+03	2.36E+02	4.35E+02	1.57E+03
4.50E+02	6.46E+02	6.57E+01	4.50E+02	1.32E+03	7.21E+01	4.50E+02	5.51E+02	1.37E+02	4.50E+02	2.84E+02	9.95E+01	4.50E+02	7.51E+01	1.25E+02	4.50E+02	1.49E+03	1.06E+00	4.50E+02	8.22E+02	1.16E+02	4.50E+02	3.87E+02	6.79E+01	4.50E+02	6.75E+02	1.29E+02	4.50E+02	5.69E+02	1.35E+02	4.50E+02	6.13E+02	1.91E+02	4.50E+02	1.05E+03	2.15E+02	4.50E+02	7.44E+02	2.25E+02	4.50E+02	5.07E+02	1.49E+02	4.50E+02	1.22E+03	2.17E+02	4.50E+02	1.43E+03	2.38E+02	4.50E+02	1.57E+03
4.65E+02	6.47E+02	6.54E+01	4.65E+02	1.31E+03	6.80E+01	4.65E+02	5.53E+02	1.33E+02	4.65E+02	2.84E+02	9.97E+01	4.65E+02	7.41E+01	1.30E+02	4.65E+02	1.49E+03	8.12E+00	4.65E+02	8.24E+02	1.18E+02	4.65E+02	3.84E+02	6.35E+01	4.65E+02	6.72E+02	1.25E+02	4.65E+02	5.72E+02	1.34E+02	4.65E+02	6.16E+02	2.03E+02	4.65E+02	1.05E+03	2.15E+02	4.65E+02	7.42E+02	2.30E+02	4.65E+02	5.11E+02	1.43E+02	4.65E+02	1.22E+03	2.19E+02	4.65E+02	1.43E+03	2.39E+02	4.65E+02	1.57E+03
4.80E+02	6.46E+02	6.43E+01	4.80E+02	1.31E+03	6.24E+01	4.80E+02	5.58E+02	1.31E+02	4.80E+02	2.84E+02	1.01E+02	4.80E+02	7.50E+01	1.32E+02	4.80E+02	1.49E+03	1.36E+01	4.80E+02	8.23E+02	1.17E+02	4.80E+02	3.81E+02	5.90E+01	4.80E+02	6.69E+02	1.25E+02	4.80E+02	5.77E+02	1.33E+02	4.80E+02	6.11E+02	2.10E+02	4.80E+02	1.05E+03	2.15E+02	4.80E+02	7.38E+02	2.35E+02	4.80E+02	5.14E+02	1.41E+02	4.80E+02	1.22E+03	2.21E+02	4.80E+02	1.43E+03	2.40E+02	4.80E+02	1.57E+03
4.95E+02	6.45E+02	6.44E+01	4.95E+02	1.31E+03	6.21E+01	4.95E+02	5.66E+02	1.30E+02	4.95E+02	2.85E+02	9.95E+01	4.95E+02	8.07E+01	1.35E+02	4.95E+02	1.48E+03	2.08E+01	4.95E+02	8.24E+02	1.17E+02	4.95E+02	3.79E+02	5.55E+01	4.95E+02	6.67E+02	1.23E+02	4.95E+02	5.83E+02	1.35E+02	4.95E+02	6.06E+02	2.12E+02	4.95E+02	1.05E+03	2.15E+02	4.95E+02	7.33E+02	2.37E+02	4.95E+02	5.12E+02	1.36E+02	4.95E+02	1.22E+03	2.24E+02	4.95E+02	1.43E+03	2.44E+02	4.95E+02	1.58E+03
5.10E+02	6.45E+02	6.43E+01	5.10E+02	1.31E+03	6.29E+01	5.10E+02	5.73E+02	1.28E+02	5.10E+02	2.84E+02	9.88E+01	5.10E+02	8.29E+01	1.38E+02	5.10E+02	1.49E+03	2.78E+01	5.10E+02	8.23E+02	1.16E+02	5.10E+02	3.77E+02	5.33E+01	5.10E+02	6.67E+02	1.23E+02	5.10E+02	5.90E+02	1.33E+02	5.10E+02	5.95E+02	2.12E+02	5.10E+02	1.05E+03	2.15E+02	5.10E+02	7.31E+02	2.34E+02	5.10E+02	5.04E+02	1.30E+02	5.10E+02	1.22E+03	2.30E+02	5.10E+02	1.44E+03	2.49E+02	5.10E+02	1.58E+03
5.25E+02	6.45E+02	6.43E+01	5.25E+02	1.30E+03	6.51E+01	5.25E+02	5.78E+02	1.26E+02	5.25E+02	2.86E+02	1.00E+02	5.25E+02	8.25E+01	1.42E+02	5.25E+02	1.49E+03	3.58E+01	5.25E+02	8.24E+02	1.15E+02	5.25E+02	3.72E+02	5.55E+01	5.25E+02	6.66E+02	1.21E+02	5.25E+02	5.91E+02	1.25E+02	5.25E+02	5.93E+02	2.06E+02	5.25E+02	1.05E+03	2.19E+02	5.25E+02	7.30E+02	2.31E+02	5.25E+02	4.96E+02	1.32E+02	5.25E+02	1.22E+03	2.30E+02	5.25E+02	1.44E+03	2.53E+02	5.25E+02	1.58E+03
5.40E+02	6.45E+02	6.39E+01	5.40E+02	1.29E+03	6.61E+01	5.40E+02	5.84E+02	1.28E+02	5.40E+02	2.87E+02	9.85E+01	5.40E+02	8.62E+01	1.42E+02	5.40E+02	1.48E+03	4.07E+01	5.40E+02	8.24E+02	1.13E+02	5.40E+02	3.64E+02	5.33E+01	5.40E+02	6.67E+02	1.18E+02	5.40E+02	5.92E+02	1.21E+02	5.40E+02	5.83E+02	2.02E+02	5.40E+02	1.05E+03	2.25E+02	5.40E+02	7.28E+02	2.24E+02	5.40E+02	4.89E+02	1.33E+02	5.40E+02	1.22E+03	2.35E+02	5.40E+02	1.44E+03	2.61E+02	5.40E+02	1.59E+03
5.55E+02	6.45E+02	6.38E+01	5.55E+02	1.29E+03	6.34E+01	5.55E+02	5.88E+02	1.36E+02	5.55E+02	2.87E+02	9.94E+01	5.55E+02	8.60E+01	1.41E+02	5.55E+02	1.48E+03	4.84E+01	5.55E+02	8.22E+02	1.18E+02	5.55E+02	3.61E+02	4.84E+01	5.55E+02	6.70E+02	1.19E+02	5.55E+02	5.92E+02	1.21E+02	5.55E+02	5.74E+02	1.98E+02	5.55E+02	1.04E+03	2.31E+02	5.55E+02	7.28E+02	2.18E+02	5.55E+02	4.87E+02	1.30E+02	5.55E+02	1.22E+03	2.40E+02	5.55E+02	1.44E+03	2.61E+02	5.55E+02	1.59E+03
5.70E+02	6.45E+02	6.34E+01	5.70E+02	1.28E+03	5.96E+01	5.70E+02	5.95E+02	1.40E+02	5.70E+02	2.87E+02	9.87E+01	5.70E+02	8.59E+01	1.40E+02	5.70E+02	1.49E+03	5.18E+01	5.70E+02	8.20E+02	1.19E+02	5.70E+02	3.61E+02	4.72E+01	5.70E+02	6.70E+02	1.20E+02	5.70E+02	5.94E+02	1.21E+02	5.70E+02	5.68E+02	1.97E+02	5.70E+02	1.04E+03	2.31E+02	5.70E+02	7.32E+02	2.14E+02	5.70E+02	4.85E+02	1.22E+02	5.70E+02	1.22E+03	2.40E+02	5.70E+02	1.44E+03	2.58E+02	5.70E+02	1.59E+03
5.85E+02	6.47E+02	6.30E+01	5.85E+02	1.28E+03	5.58E+01	5.85E+02	6.03E+02	1.42E+02	5.85E+02	2.87E+02	9.89E+01	5.85E+02	8.55E+01	1.39E+02	5.85E+02	1.49E+03	6.03E+01	5.85E+02	8.18E+02	1.18E+02	5.85E+02	3.60E+02	4.60E+01	5.85E+02	6.72E+02	1.24E+02	5.85E+02	5.99E+02	1.19E+02	5.85E+02	5.65E+02	1.95E+02	5.85E+02	1.04E+03	2.31E+02	5.85E+02	7.32E+02	2.13E+02	5.85E+02	4.88E+02	1.16E+02	5.85E+02	1.22E+03	2.40E+02	5.85E+02	1.44E+03	2.54E+02	5.85E+02	1.59E+03
6.00E+02	6.48E+02	6.32E+01	6.00E+02	1.28E+03	5.34E+01	6.00E+02	6.11E+02	1.43E+02	6.00E+02	2.87E+02	9.86E+01	6.00E+02	8.71E+01	1.34E+02	6.00E+02	1.49E+03	6.41E+01	6.00E+02	8.16E+02	1.14E+02	6.00E+02	3.59E+02	4.27E+01	6.00E+02	6.72E+02	1.28E+02	6.00E+02	6.02E+02	1.15E+02	6.00E+02	5.62E+02	1.89E+02	6.00E+02	1.04E+03	2.34E+02	6.00E+02	7.36E+02	2.15E+02	6.00E+02	4.90E+02	1.15E+02	6.00E+02	1.22E+03	2.44E+02	6.00E+02	1.45E+03	2.53E+02	6.00E+02	1.59E+03
6.15E+02	6.48E+02	6.32E+01	6.15E+02	1.27E+03	5.09E+01	6.15E+02	6.20E+02	1.43E+02	6.15E+02	2.87E+02	9.86E+01	6.15E+02	8.98E+01	1.29E+02	6.15E+02	1.48E+03	6.97E+01	6.15E+02	8.13E+02	1.11E+02	6.15E+02	3.58E+02	3.88E+01	6.15E+02	6.73E+02	1.30E+02	6.15E+02	6.05E+02	1.11E+02	6.15E+02	5.55E+02	1.81E+02	6.15E+02	1.03E+03	2.34E+02	6.15E+02	7.36E+02	2.18E+02	6.15E+02	4.94E+02	1.14E+02	6.15E+02	1.21E+03	2.43E+02	6.15E+02	1.45E+03	2.55E+02	6.15E+02	1.58E+03
6.30E+02	6.51E+02	6.02E+01	6.30E+02	1.27E+03	4.39E+01	6.30E+02	6.25E+02	1.44E+02	6.30E+02	2.86E+02	9.94E+01	6.30E+02	9.48E+01	1.28E+02	6.30E+02	1.48E+03	7.23E+01	6.30E+02	8.08E+02	1.05E+02	6.30E+02	3.47E+02	3.84E+01	6.30E+02	6.76E+02	1.32E+02	6.30E+02	6.07E+02	1.12E+02	6.30E+02	5.54E+02	1.76E+02	6.30E+02	1.04E+03	2.28E+02	6.30E+02	7.34E+02	2.19E+02	6.30E+02	4.97E+02	1.14E+02	6.30E+02	1.21E+03	2.42E+02	6.30E+02	1.45E+03	2.60E+02	6.30E+02	1.58E+03
6.45E+02	6.61E+02	5.63E+01	6.45E+02	1.28E+03	3.93E+01	6.45E+02	6.35E+02	1.43E+02	6.45E+02	2.86E+02	9.99E+01	6.45E+02	1.01E+02	1.28E+02	6.45E+02	1.48E+03	7.73E+01	6.45E+02	8.03E+02	1.00E+02	6.45E+02	3.47E+02	3.66E+01	6.45E+02	6.78E+02	1.35E+02	6.45E+02	6.10E+02	1.15E+02	6.45E+02	5.54E+02	1.72E+02	6.45E+02	1.04E+03	2.23E+02	6.45E+02	7.32E+02	2.20E+02	6.45E+02	5.00E+02	1.14E+02	6.45E+02	1.20E+03	2.42E+02	6.45E+02	1.45E+03	2.65E+02	6.45E+02	1.58E+03
6.60E+02	6.67E+02	5.59E+01	6.60E+02	1.27E+03	3.53E+01	6.60E+02	6.42E+02	1.42E+02	6.60E+02	2.85E+02	1.00E+02	6.60E+02	1.06E+02	1.27E+02	6.60E+02	1.48E+03	8.14E+01	6.60E+02	7.97E+02	9.61E+01	6.60E+02	3.47E+02	3.79E+01	6.60E+02	6.75E+02	1.38E+02	6.60E+02	6.13E+02	1.17E+02	6.60E+02	5.48E+02	1.67E+02	6.60E+02	1.04E+03	2.19E+02	6.60E+02	7.30E+02	2.20E+02	6.60E+02	5.05E+02	1.15E+02	6.60E+02	1.20E+03	2.40E+02	6.60E+02	1.45E+03	2.68E+02	6.60E+02	1.59E+03
6.75E+02	6.72E+02	4.92E+01	6.75E+02	1.27E+03	3.11E+01	6.75E+02	6.44E+02	1.46E+02	6.75E+02	2.85E+02	1.00E+02	6.75E+02	1.13E+02	1.31E+02	6.75E+02	1.48E+03	8.50E+01	6.75E+02	7.94E+02	9.17E+01	6.75E+02	3.45E+02	3.93E+01	6.75E+02	6.69E+02	1.41E+02	6.75E+02	6.17E+02	1.19E+02	6.75E+02	5.47E+02	1.63E+02	6.75E+02	1.04E+03	2.19E+02	6.75E+02	7.28E+02	2.18E+02	6.75E+02	5.08E+02	1.13E+02	6.75E+02	1.20E+03	2.38E+02	6.75E+02	1.46E+03	2.63E+02	6.75E+02	1.60E+03
6.90E+02	6.73E+02	4.68E+01	6.90E+02	1.27E+03	2.64E+01	6.90E+02	6.47E+02	1.48E+02	6.90E+02	2.86E+02	9.94E+01	6.90E+02	1.18E+02	1.31E+02	6.90E+02	1.49E+03	9.06E+01	6.90E+02	7.91E+02	8.53E+01	6.90E+02	3.40E+02	4.20E+01	6.90E+02	6.63E+02	1.40E+02	6.90E+02	6.22E+02	1.21E+02	6.90E+02	5.46E+02	1.57E+02	6.90E+02	1.05E+03	2.21E+02	6.90E+02	7.28E+02	2.19E+02	6.90E+02	5.11E+02	1.12E+02	6.90E+02	1.19E+03	2.38E+02	6.90E+02	1.46E+03	2.62E+02	6.90E+02	1.60E+03
7.05E+02	6.75E+02	4.57E+01	7.05E+02	1.27E+03	2.49E+01	7.05E+02	6.49E+02	1.48E+02	7.05E+02	2.86E+02	9.93E+01	7.05E+02	1.21E+02	1.32E+02	7.05E+02	1.48E+03	9.77E+01	7.05E+02	7.91E+02	7.88E+01	7.05E+02	3.33E+02	4.31E+01	7.05E+02	6.55E+02	1.35E+02	7.05E+02	6.24E+02	1.22E+02	7.05E+02	5.55E+02	1.51E+02	7.05E+02	1.04E+03	2.21E+02	7.05E+02	7.31E+02	2.18E+02	7.05E+02	5.16E+02	1.14E+02	7.05E+02	1.19E+03	2.36E+02	7.05E+02	1.47E+03	2.58E+02	7.05E+02	1.60E+03
7.20E+02	6.77E+02	4.54E+01	7.20E+02	1.28E+03	2.54E+01	7.20E+02	6.50E+02	1.48E+02	7.20E+02	2.86E+02	9.91E+01	7.20E+02	1.24E+02	1.37E+02	7.20E+02	1.48E+03	1.03E+02	7.20E+02	7.93E+02	7.48E+01	7.20E+02	3.28E+02	4.81E+01	7.20E+02	6.50E+02	1.33E+02	7.20E+02	6.23E+02	1.22E+02	7.20E+02	5.63E+02	1.44E+02	7.20E+02	1.04E+03	2.21E+02	7.20E+02	7.31E+02	2.19E+02	7.20E+02	5.20E+02	1.19E+02	7.20E+02	1.18E+03	2.38E+02	7.20E+02	1.47E+03	2.54E+02	7.20E+02	1.60E+03
7.35E+02	6.82E+02	4.26E+01	7.35E+02	1.28E+03	2.45E+01	7.35E+02	6.54E+02	1.44E+02	7.35E+02	2.86E+02	9.90E+01	7.35E+02	1.28E+02	1.38E+02	7.35E+02	1.49E+03	1.05E+02	7.35E+02	7.92E+02	7.26E+01	7.35E+02	3.26E+02	5.29E+01	7.35E+02	6.46E+02	1.28E+02	7.35E+02	6.23E+02	1.22E+02	7.35E+02	5.68E+02	1.36E+02	7.35E+02	1.05E+03	2.18E+02	7.35E+02	7.31E+02	2.18E+02	7.35E+02	5.25E+02	1.23E+02	7.35E+02	1.18E+03	2.36E+02	7.35E+02	1.47E+03	2.51E+02	7.35E+02	1.60E+03
7.50E+02	6.86E+02	3.79E+01	7.50E+02	1.28E+03	2.33E+01	7.50E+02	6.56E+02	1.44E+02	7.50E+02	2.86E+02	9.87E+01	7.50E+02	1.30E+02	1.40E+02	7.50E+02	1.50E+03	1.05E+02	7.50E+02	7.91E+02	7.13E+01	7.50E+02	3.27E+02	5.86E+01	7.50E+02	6.42E+02	1.27E+02	7.50E+02	6.22E+02	1.22E+02	7.50E+02	5.70E+02	1.31E+02	7.50E+02	1.05E+03	2.13E+02	7.50E+02	7.31E+02	2.17E+02	7.50E+02	5.30E+02	1.25E+02	7.50E+02	1.18E+03	2.39E+02	7.50E+02	1.47E+03	2.47E+02	7.50E+02	1.60E+03
7.65E+02	6.89E+02	3.52E+01	7.65E+02	1.28E+03	1.97E+01	7.65E+02	6.60E+02	1.40E+02	7.65E+02	2.86E+02	9.85E+01	7.65E+02	1.32E+02	1.42E+02	7.65E+02	1.50E+03	1.06E+02	7.65E+02	7.89E+02	6.82E+01	7.65E+02	3.28E+02	6.21E+01	7.65E+02	6.36E+02	1.28E+02	7.65E+02	6.16E+02	1.21E+02	7.65E+02	5.74E+02	1.26E+02	7.65E+02	1.05E+03	2.13E+02	7.65E+02	7.32E+02	2.16E+02	7.65E+02	5.33E+02	1.21E+02	7.65E+02	1.18E+03	2.40E+02	7.65E+02	1.47E+03	2.42E+02	7.65E+02	1.60E+03
7.80E+02	6.93E+02	3.41E+01	7.80E+02	1.29E+03	1.98E+01	7.80E+02	6.61E+02	1.37E+02	7.80E+02	2.86E+02	9.84E+01	7.80E+02	1.33E+02	1.43E+02	7.80E+02	1.51E+03	1.10E+02	7.80E+02	7.89E+02	6.61E+01	7.80E+02	3.28E+02	6.65E+01	7.80E+02	6.34E+02	1.29E+02	7.80E+02	6.11E+02	1.20E+02	7.80E+02	5.81E+02	1.24E+02	7.80E+02	1.05E+03	2.16E+02	7.80E+02	7.33E+02	2.16E+02	7.80E+02	5.33E+02	1.18E+02	7.80E+02	1.18E+03	2.42E+02	7.80E+02	1.47E+03	2.38E+02	7.80E+02	1.61E+03
7.95E+02	6.95E+02	3.33E+01	7.95E+02	1.29E+03	2.29E+01	7.95E+02	6.62E+02	1.37E+02	7.95E+02	2.86E+02	9.90E+01	7.95E+02	1.36E+02	1.46E+02	7.95E+02	1.51E+03	1.07E+02	7.95E+02	7.85E+02	5.91E+01	7.95E+02	3.26E+02	7.17E+01	7.95E+02	6.33E+02	1.29E+02	7.95E+02	6.10E+02	1.13E+02	7.95E+02	5.86E+02	1.24E+02	7.95E+02	1.05E+03	2.18E+02	7.95E+02	7.32E+02	2.16E+02	7.95E+02	5.31E+02	1.18E+02	7.95E+02	1.18E+03	2.42E+02	7.95E+02	1.48E+03	2.36E+02	7.95E+02	1.61E+03
8.10E+02	6.98E+02	3.37E+01	8.10E+02	1.29E+03	2.74E+01	8.10E+02	6.67E+02	1.37E+02	8.10E+02	2.82E+02	9.90E+01	8.10E+02	1.38E+02	1.47E+02	8.10E+02	1.52E+03	1.02E+02	8.10E+02	7.83E+02	5.54E+01	8.10E+02	3.23E+02	7.86E+01	8.10E+02	6.34E+02	1.30E+02	8.10E+02	6.09E+02	1.06E+02	8.10E+02	5.88E+02	1.22E+02	8.10E+02	1.05E+03	2.19E+02	8.10E+02	7.32E+02	2.16E+02	8.10E+02	5.38E+02	1.14E+02	8.10E+02	1.18E+03	2.46E+02	8.10E+02	1.49E+03	2.39E+02	8.10E+02	1.60E+03
8.25E+02	7.05E+02	3.14E+01	8.25E+02	1.29E+03	3.12E+01	8.25E+02	6.70E+02	1.36E+02	8.25E+02	2.82E+02	9.89E+01	8.25E+02	1.43E+02	1.52E+02	8.25E+02	1.51E+03	9.45E+01	8.25E+02	7.83E+02	5.44E+01	8.25E+02	3.23E+02	8.36E+01	8.25E+02	6.35E+02	1.32E+02	8.25E+02	6.04E+02	1.01E+02	8.25E+02	5.91E+02	1.20E+02	8.25E+02	1.06E+03	2.18E+02	8.25E+02	7.33E+02	2.15E+02	8.25E+02	5.40E+02	1.13E+02	8.25E+02	1.18E+03	2.49E+02	8.25E+02	1.49E+03	2.37E+02	8.25E+02	1.60E+03
8.40E+02	7.08E+02	2.79E+01	8.40E+02	1.28E+03	3.49E+01	8.40E+02	6.74E+02	1.35E+02	8.40E+02	2.82E+02	9.87E+01	8.40E+02	1.45E+02	1.54E+02	8.40E+02	1.51E+03	8.96E+01	8.40E+02	7.78E+02	5.49E+01	8.40E+02	3.21E+02	8.64E+01	8.40E+02	6.33E+02	1.36E+02	8.40E+02	5.98E+02	9.71E+01	8.40E+02	5.94E+02	1.20E+02	8.40E+02	1.05E+03	2.19E+02	8.40E+02	7.30E+02	2.16E+02	8.40E+02	5.43E+02	1.13E+02	8.40E+02	1.18E+03	2.50E+02	8.40E+02	1.49E+03	2.34E+02	8.40E+02	1.60E+03
8.55E+02	7.12E+02	2.17E+01	8.55E+02	1.28E+03	4.08E+01	8.55E+02	6.80E+02	1.39E+02	8.55E+02	2.82E+02	9.78E+01	8.55E+02	1.49E+02	1.48E+02	8.55E+02	1.52E+03	8.60E+01	8.55E+02	7.73E+02	6.00E+01	8.55E+02	3.21E+02	8.90E+01	8.55E+02	6.31E+02	1.36E+02	8.55E+02	5.99E+02	9.03E+01	8.55E+02	6.00E+02	1.21E+02	8.55E+02	1.05E+03	2.19E+02	8.55E+02	7.25E+02	2.21E+02	8.55E+02	5.48E+02	1.14E+02	8.55E+02	1.19E+03	2.55E+02	8.55E+02	1.50E+03	2.28E+02	8.55E+02	1.59E+03
8.70E+02	7.15E+02	1.71E+01	8.70E+02	1.29E+03	4.30E+01	8.70E+02	6.82E+02	1.42E+02	8.70E+02	2.88E+02	1.00E+02	8.70E+02	1.51E+02	1.44E+02	8.70E+02	1.52E+03	8.04E+01	8.70E+02	7.67E+02	7.05E+01	8.70E+02	3.22E+02	9.15E+01	8.70E+02	6.30E+02	1.36E+02	8.70E+02	6.00E+02	8.82E+01	8.70E+02	6.02E+02	1.29E+02	8.70E+02	1.06E+03	2.18E+02	8.70E+02	7.24E+02	2.21E+02	8.70E+02	5.54E+02	1.15E+02	8.70E+02	1.19E+03	2.58E+02	8.70E+02	1.50E+03	2.25E+02	8.70E+02	1.59E+03
8.85E+02	7.18E+02	1.35E+01	8.85E+02	1.30E+03	4.00E+01	8.85E+02	6.83E+02	1.50E+02	8.85E+02	2.88E+02	1.01E+02	8.85E+02	1.55E+02	1.40E+02	8.85E+02	1.53E+03	7.62E+01	8.85E+02	7.66E+02	7.97E+01	8.85E+02	3.24E+02	9.50E+01	8.85E+02	6.30E+02	1.37E+02	8.85E+02	5.95E+02	8.63E+01	8.85E+02	6.06E+02	1.35E+02	8.85E+02	1.06E+03	2.18E+02	8.85E+02	7.26E+02	2.21E+02	8.85E+02	5.59E+02	1.13E+02	8.85E+02	1.19E+03	2.60E+02	8.85E+02	1.50E+03	2.20E+02	8.85E+02	1.58E+03
9.00E+02	7.21E+02	1.21E+01	9.00E+02	1.30E+03	3.65E+01	9.00E+02	6.86E+02	1.54E+02	9.00E+02	2.88E+02	9.93E+01	9.00E+02	1.59E+02	1.36E+02	9.00E+02	1.54E+03	7.82E+01	9.00E+02	7.59E+02	8.53E+01	9.00E+02	3.25E+02	1.00E+02	9.00E+02	6.30E+02	1.38E+02	9.00E+02	5.87E+02	7.99E+01	9.00E+02	6.03E+02	1.40E+02	9.00E+02	1.06E+03	2.18E+02	9.00E+02	7.25E+02	2.21E+02	9.00E+02	5.64E+02	1.13E+02	9.00E+02	1.20E+03	2.58E+02	9.00E+02	1.50E+03	2.16E+02	9.00E+02	1.58E+03
9.15E+02	7.24E+02	1.28E+01	9.15E+02	1.30E+03	3.00E+01	9.15E+02	6.89E+02	1.58E+02	9.15E+02	2.88E+02	1.00E+02	9.15E+02	1.62E+02	1.33E+02	9.15E+02	1.54E+03	7.72E+01	9.15E+02	7.54E+02	9.21E+01	9.15E+02	3.28E+02	1.04E+02	9.15E+02	6.29E+02	1.36E+02	9.15E+02	5.88E+02	7.82E+01	9.15E+02	5.98E+02	1.47E+02	9.15E+02	1.06E+03	2.16E+02	9.15E+02	7.23E+02	2.22E+02	9.15E+02	5.68E+02	1.14E+02	9.15E+02	1.20E+03	2.56E+02	9.15E+02	1.50E+03	2.13E+02	9.15E+02	1.58E+03
9.30E+02	7.30E+02	1.26E+01	9.30E+02	1.30E+03	2.75E+01	9.30E+02	6.93E+02	1.60E+02	9.30E+02	2.88E+02	1.00E+02	9.30E+02	1.68E+02	1.32E+02	9.30E+02	1.54E+03	7.33E+01	9.30E+02	7.49E+02	9.80E+01	9.30E+02	3.25E+02	1.10E+02	9.30E+02	6.28E+02	1.36E+02	9.30E+02	5.89E+02	7.35E+01	9.30E+02	5.93E+02	1.52E+02	9.30E+02	1.07E+03	2.16E+02	9.30E+02	7.22E+02	2.26E+02	9.30E+02	5.71E+02	1.15E+02	9.30E+02	1.20E+03	2.53E+02	9.30E+02	1.51E+03	2.09E+02	9.30E+02	1.58E+03
9.45E+02	7.37E+02	9.99E+00	9.45E+02	1.31E+03	2.96E+01	9.45E+02	6.98E+02	1.60E+02	9.45E+02	2.88E+02	9.98E+01	9.45E+02	1.71E+02	1.30E+02	9.45E+02	1.54E+03	7.38E+01	9.45E+02	7.43E+02	9.97E+01	9.45E+02	3.24E+02	1.13E+02	9.45E+02	6.28E+02	1.35E+02	9.45E+02	5.93E+02	7.14E+01	9.45E+02	5.91E+02	1.56E+02	9.45E+02	1.07E+03	2.16E+02	9.45E+02	7.21E+02	2.34E+02	9.45E+02	5.77E+02	1.16E+02	9.45E+02	1.20E+03	2.47E+02	9.45E+02	1.51E+03	2.08E+02	9.45E+02	1.57E+03
9.60E+02	7.43E+02	7.03E+00	9.60E+02	1.31E+03	3.14E+01	9.60E+02	7.04E+02	1.62E+02	9.60E+02	2.88E+02	9.95E+01	9.60E+02	1.73E+02	1.30E+02	9.60E+02	1.54E+03	7.81E+01	9.60E+02	7.36E+02	1.02E+02	9.60E+02	3.17E+02	1.17E+02	9.60E+02	6.26E+02	1.30E+02	9.60E+02	5.95E+02	6.88E+01	9.60E+02	5.87E+02	1.57E+02	9.60E+02	1.07E+03	2.22E+02	9.60E+02	7.22E+02	2.38E+02	9.60E+02	5.82E+02	1.17E+02	9.60E+02	1.20E+03	2.44E+02	9.60E+02	1.51E+03	2.06E+02	9.60E+02	1.57E+03
9.75E+02	7.50E+02	1.11E+01	9.75E+02	1.31E+03	3.61E+01	9.75E+02	7.09E+02	1.64E+02	9.75E+02	2.88E+02	9.94E+01	9.75E+02	1.74E+02	1.30E+02	9.75E+02	1.55E+03	8.36E+01	9.75E+02	7.32E+02	1.06E+02	9.75E+02	3.14E+02	1.17E+02	9.75E+02	6.27E+02	1.24E+02	9.75E+02	6.00E+02	6.67E+01	9.75E+02	5.81E+02	1.53E+02	9.75E+02	1.08E+03	2.22E+02	9.75E+02	7.23E+02	2.40E+02	9.75E+02	5.87E+02	1.15E+02	9.75E+02	1.20E+03	2.39E+02	9.75E+02	1.51E+03	2.02E+02	9.75E+02	1.57E+03
9.90E+02	7.53E+02	1.51E+01	9.90E+02	1.31E+03	3.94E+01	9.90E+02	7.14E+02	1.64E+02	9.90E+02	2.88E+02	9.94E+01	9.90E+02	1.75E+02	1.31E+02	9.90E+02	1.55E+03	8.91E+01	9.90E+02	7.28E+02	1.08E+02	9.90E+02	3.10E+02	1.13E+02	9.90E+02	6.32E+02	1.18E+02	9.90E+02	6.04E+02	5.99E+01	9.90E+02	5.76E+02	1.48E+02	9.90E+02	1.08E+03	2.22E+02	9.90E+02	7.23E+02	2.42E+02	9.90E+02	5.89E+02	1.09E+02	9.90E+02	1.20E+03	2.33E+02	9.90E+02	1.51E+03	2.00E+02	9.90E+02	1.57E+03
1.01E+03	7.56E+02	1.71E+01	1.01E+03	1.32E+03	4.70E+01	1.01E+03	7.17E+02	1.63E+02	1.01E+03	2.88E+02	9.91E+01	1.01E+03	1.75E+02	1.32E+02	1.01E+03	1.54E+03	9.08E+01	1.01E+03	7.24E+02	1.08E+02	1.01E+03	3.06E+02	1.11E+02	1.01E+03	6.39E+02	1.14E+02	1.01E+03	6.00E+02	5.27E+01	1.01E+03	5.67E+02	1.43E+02	1.01E+03	1.08E+03	2.24E+02	1.01E+03	7.24E+02	2.44E+02	1.01E+03	5.93E+02	1.03E+02	1.01E+03	1.20E+03	2.30E+02	1.01E+03	1.52E+03	1.98E+02	1.01E+03	1.56E+03
1.02E+03	7.51E+02	2.32E+01	1.02E+03	1.32E+03	4.94E+01	1.02E+03	7.21E+02	1.60E+02	1.02E+03	2.88E+02	9.91E+01	1.02E+03	1.77E+02	1.37E+02	1.02E+03	1.54E+03	9.57E+01	1.02E+03	7.14E+02	1.07E+02	1.02E+03	3.05E+02	1.05E+02	1.02E+03	6.43E+02	1.10E+02	1.02E+03	5.97E+02	5.11E+01	1.02E+03	5.67E+02	1.34E+02	1.02E+03	1.08E+03	2.29E+02	1.02E+03	7.25E+02	2.48E+02	1.02E+03	5.90E+02	9.87E+01	1.02E+03	1.20E+03	2.34E+02	1.02E+03	1.52E+03	2.00E+02	1.02E+03	1.56E+03
1.04E+03	7.47E+02	3.06E+01	1.04E+03	1.32E+03	4.95E+01	1.04E+03	7.25E+02	1.56E+02	1.04E+03	2.88E+02	9.90E+01	1.04E+03	1.79E+02	1.42E+02	1.04E+03	1.54E+03	9.86E+01	1.04E+03	7.07E+02	1.09E+02	1.04E+03	3.05E+02	1.01E+02	1.04E+03	6.50E+02	1.08E+02	1.04E+03	5.92E+02	4.93E+01	1.04E+03	5.66E+02	1.27E+02	1.04E+03	1.08E+03	2.31E+02	1.04E+03	7.28E+02	2.50E+02	1.04E+03	5.85E+02	9.48E+01	1.04E+03	1.20E+03	2.36E+02	1.04E+03	1.52E+03	2.01E+02	1.04E+03	1.56E+03
1.05E+03	7.47E+02	3.76E+01	1.05E+03	1.33E+03	4.68E+01	1.05E+03	7.29E+02	1.51E+02	1.05E+03	2.88E+02	9.90E+01	1.05E+03	1.79E+02	1.47E+02	1.05E+03	1.53E+03	9.87E+01	1.05E+03	7.02E+02	1.07E+02	1.05E+03	3.01E+02	1.01E+02	1.05E+03	6.56E+02	1.10E+02	1.05E+03	5.90E+02	4.40E+01	1.05E+03	5.61E+02	1.21E+02	1.05E+03	1.07E+03	2.39E+02	1.05E+03	7.28E+02	2.52E+02	1.05E+03	5.79E+02	9.14E+01	1.05E+03	1.19E+03	2.39E+02	1.05E+03	1.52E+03	2.02E+02	1.05E+03	1.56E+03
1.07E+03	7.47E+02	4.19E+01	1.07E+03	1.34E+03	4.21E+01	1.07E+03	7.31E+02	1.43E+02	1.07E+03	2.88E+02	9.90E+01	1.07E+03	1.80E+02	1.53E+02	1.07E+03	1.53E+03	9.69E+01	1.07E+03	6.95E+02	1.04E+02	1.07E+03	2.98E+02	1.06E+02	1.07E+03	6.61E+02	1.09E+02	1.07E+03	5.88E+02	4.07E+01	1.07E+03	5.61E+02	1.16E+02	1.07E+03	1.07E+03	2.47E+02	1.07E+03	7.28E+02	2.55E+02	1.07E+03	5.77E+02	8.46E+01	1.07E+03	1.19E+03	2.38E+02	1.07E+03	1.52E+03	2.03E+02	1.07E+03	1.57E+03
1.08E+03	7.48E+02	4.80E+01	1.08E+03	1.34E+03	4.28E+01	1.08E+03	7.33E+02	1.39E+02	1.08E+03	2.89E+02	9.96E+01	1.08E+03	1.80E+02	1.56E+02	1.08E+03	1.52E+03	9.66E+01	1.08E+03	6.88E+02	1.03E+02	1.08E+03	2.98E+02	1.07E+02	1.08E+03	6.67E+02	1.03E+02	1.08E+03	5.84E+02	4.09E+01	1.08E+03	5.70E+02	1.10E+02	1.08E+03	1.06E+03	2.52E+02	1.08E+03	7.29E+02	2.58E+02	1.08E+03	5.76E+02	7.73E+01	1.08E+03	1.18E+03	2.35E+02	1.08E+03	1.52E+03	2.03E+02	1.08E+03	1.57E+03
1.10E+03	7.51E+02	5.42E+01	1.10E+03	1.35E+03	4.41E+01	1.10E+03	7.36E+02	1.37E+02	1.10E+03	2.89E+02	9.91E+01	1.10E+03	1.82E+02	1.56E+02	1.10E+03	1.52E+03	9.49E+01	1.10E+03	6.83E+02	1.02E+02	1.10E+03	2.98E+02	1.14E+02	1.10E+03	6.68E+02	9.86E+01	1.10E+03	5.79E+02	3.90E+01	1.10E+03	5.77E+02	1.03E+02	1.10E+03	1.06E+03	2.54E+02	1.10E+03	7.29E+02	2.62E+02	1.10E+03	5.79E+02	7.35E+01	1.10E+03	1.19E+03	2.32E+02	1.10E+03	1.51E+03	2.04E+02	1.10E+03	1.58E+03
1.11E+03	7.52E+02	5.77E+01	1.11E+03	1.35E+03	4.25E+01	1.11E+03	7.37E+02	1.31E+02	1.11E+03	2.91E+02	9.95E+01	1.11E+03	1.89E+02	1.55E+02	1.11E+03	1.51E+03	9.57E+01	1.11E+03	6.84E+02	9.53E+01	1.11E+03	2.96E+02	1.19E+02	1.11E+03	6.68E+02	9.84E+01	1.11E+03	5.74E+02	3.83E+01	1.11E+03	5.82E+02	1.01E+02	1.11E+03	1.06E+03	2.59E+02	1.11E+03	7.28E+02	2.64E+02	1.11E+03	5.79E+02	7.09E+01	1.11E+03	1.19E+03	2.28E+02	1.11E+03	1.51E+03	2.05E+02	1.11E+03	1.58E+03
1.13E+03	7.54E+02	6.05E+01	1.13E+03	1.36E+03	3.87E+01	1.13E+03	7.37E+02	1.27E+02	1.13E+03	2.91E+02	1.00E+02	1.13E+03	1.94E+02	1.55E+02	1.13E+03	1.51E+03	9.65E+01	1.13E+03	6.83E+02	9.24E+01	1.13E+03	2.97E+02	1.25E+02	1.13E+03	6.68E+02	9.85E+01	1.13E+03	5.70E+02	3.75E+01	1.13E+03	5.93E+02	9.85E+01	1.13E+03	1.06E+03	2.61E+02	1.13E+03	7.24E+02	2.68E+02	1.13E+03	5.82E+02	6.60E+01	1.13E+03	1.19E+03	2.26E+02	1.13E+03	1.51E+03	2.06E+02	1.13E+03	1.58E+03
1.14E+03	7.55E+02	6.46E+01	1.14E+03	1.37E+03	3.99E+01	1.14E+03	7.37E+02	1.23E+02	1.14E+03	2.91E+02	9.97E+01	1.14E+03	1.97E+02	1.54E+02	1.14E+03	1.50E+03	9.61E+01	1.14E+03	6.84E+02	8.34E+01	1.14E+03	2.99E+02	1.30E+02	1.14E+03	6.67E+02	9.90E+01	1.14E+03	5.67E+02	4.25E+01	1.14E+03	6.03E+02	9.75E+01	1.14E+03	1.05E+03	2.61E+02	1.14E+03	7.21E+02	2.68E+02	1.14E+03	5.82E+02	6.29E+01	1.14E+03	1.19E+03	2.25E+02	1.14E+03	1.50E+03	2.06E+02	1.14E+03	1.58E+03
1.16E+03	7.54E+02	6.78E+01	1.16E+03	1.37E+03	4.54E+01	1.16E+03	7.40E+02	1.18E+02	1.16E+03	2.91E+02	9.96E+01	1.16E+03	2.01E+02	1.49E+02	1.16E+03	1.50E+03	9.10E+01	1.16E+03	6.84E+02	7.97E+01	1.16E+03	2.99E+02	1.34E+02	1.16E+03	6.67E+02	1.01E+02	1.16E+03	5.64E+02	4.28E+01	1.16E+03	6.13E+02	9.74E+01	1.16E+03	1.04E+03	2.61E+02	1.16E+03	7.22E+02	2.67E+02	1.16E+03	5.82E+02	5.96E+01	1.16E+03	1.20E+03	2.21E+02	1.16E+03	1.50E+03	2.07E+02	1.16E+03	1.58E+03
1.17E+03	7.51E+02	7.16E+01	1.17E+03	1.36E+03	5.11E+01	1.17E+03	7.43E+02	1.15E+02	1.17E+03	2.91E+02	9.95E+01	1.17E+03	2.01E+02	1.48E+02	1.17E+03	1.50E+03	8.74E+01	1.17E+03	6.88E+02	7.48E+01	1.17E+03	2.95E+02	1.38E+02	1.17E+03	6.67E+02	1.01E+02	1.17E+03	5.61E+02	4.04E+01	1.17E+03	6.16E+02	9.58E+01	1.17E+03	1.04E+03	2.60E+02	1.17E+03	7.21E+02	2.66E+02	1.17E+03	5.84E+02	5.47E+01	1.17E+03	1.20E+03	2.17E+02	1.17E+03	1.50E+03	2.09E+02	1.17E+03	1.57E+03
1.19E+03	7.49E+02	7.63E+01	1.19E+03	1.36E+03	5.38E+01	1.19E+03	7.47E+02	1.16E+02	1.19E+03	2.91E+02	9.94E+01	1.19E+03	2.01E+02	1.46E+02	1.19E+03	1.50E+03	8.36E+01	1.19E+03	6.89E+02	6.93E+01	1.19E+03	2.92E+02	1.39E+02	1.19E+03	6.69E+02	9.83E+01	1.19E+03	5.57E+02	4.30E+01	1.19E+03	6.23E+02	9.31E+01	1.19E+03	1.03E+03	2.62E+02	1.19E+03	7.16E+02	2.69E+02	1.19E+03	5.83E+02	5.05E+01	1.19E+03	1.20E+03	2.16E+02	1.19E+03	1.50E+03	2.08E+02	1.19E+03	1.57E+03
1.20E+03	7.48E+02	7.97E+01	1.20E+03	1.36E+03	5.77E+01	1.20E+03	7.51E+02	1.18E+02	1.20E+03	2.91E+02	9.91E+01	1.20E+03	2.01E+02	1.46E+02	1.20E+03	1.51E+03	8.09E+01	1.20E+03	6.92E+02	6.50E+01	1.20E+03	2.88E+02	1.37E+02	1.20E+03	6.71E+02	9.64E+01	1.20E+03	5.52E+02	4.87E+01	1.20E+03	6.28E+02	9.30E+01	1.20E+03	1.02E+03	2.64E+02	1.20E+03	7.09E+02	2.66E+02	1.20E+03	5.83E+02	5.10E+01	1.20E+03	1.21E+03	2.16E+02	1.20E+03	1.51E+03	2.09E+02	1.20E+03	1.56E+03
1.22E+03	7.47E+02	8.41E+01	1.22E+03	1.35E+03	6.13E+01	1.22E+03	7.55E+02	1.22E+02	1.22E+03	2.91E+02	9.93E+01	1.22E+03	2.01E+02	1.46E+02	1.22E+03	1.51E+03	8.20E+01	1.22E+03	6.97E+02	6.24E+01	1.22E+03	2.88E+02	1.34E+02	1.22E+03	6.72E+02	9.62E+01	1.22E+03	5.49E+02	5.37E+01	1.22E+03	6.33E+02	9.64E+01	1.22E+03	1.02E+03	2.64E+02	1.22E+03	7.06E+02	2.66E+02	1.22E+03	5.81E+02	5.15E+01	1.22E+03	1.21E+03	2.17E+02	1.22E+03	1.51E+03	2.11E+02	1.22E+03	1.57E+03
1.23E+03	7.46E+02	8.65E+01	1.23E+03	1.35E+03	6.84E+01	1.23E+03	7.60E+02	1.27E+02	1.23E+03	2.90E+02	9.97E+01	1.23E+03	2.02E+02	1.47E+02	1.23E+03	1.52E+03	8.57E+01	1.23E+03	7.02E+02	5.71E+01	1.23E+03	2.87E+02	1.33E+02	1.23E+03	6.76E+02	9.61E+01	1.23E+03	5.41E+02	5.45E+01	1.23E+03	6.40E+02	1.02E+02	1.23E+03	1.01E+03	2.63E+02	1.23E+03	7.02E+02	2.65E+02	1.23E+03	5.76E+02	5.51E+01	1.23E+03	1.22E+03	2.23E+02	1.23E+03	1.52E+03	2.11E+02	1.23E+03	1.57E+03
1.25E+03	7.44E+02	9.23E+01	1.25E+03	1.35E+03	7.49E+01	1.25E+03	7.63E+02	1.31E+02	1.25E+03	2.90E+02	9.95E+01	1.25E+03	2.06E+02	1.48E+02	1.25E+03	1.52E+03	9.44E+01	1.25E+03	7.07E+02	5.57E+01	1.25E+03	2.87E+02	1.34E+02	1.25E+03	6.79E+02	9.40E+01	1.25E+03	5.35E+02	5.83E+01	1.25E+03	6.46E+02	1.01E+02	1.25E+03	1.01E+03	2.61E+02	1.25E+03	6.97E+02	2.60E+02	1.25E+03	5.76E+02	5.88E+01	1.25E+03	1.22E+03	2.25E+02	1.25E+03	1.52E+03	2.07E+02	1.25E+03	1.56E+03
1.26E+03	7.44E+02	9.58E+01	1.26E+03	1.34E+03	7.50E+01	1.26E+03	7.71E+02	1.37E+02	1.26E+03	2.90E+02	9.95E+01	1.26E+03	2.07E+02	1.50E+02	1.26E+03	1.51E+03	1.02E+02	1.26E+03	7.15E+02	5.62E+01	1.26E+03	2.85E+02	1.35E+02	1.26E+03	6.81E+02	8.93E+01	1.26E+03	5.36E+02	6.00E+01	1.26E+03	6.50E+02	9.66E+01	1.26E+03	1.00E+03	2.60E+02	1.26E+03	6.94E+02	2.58E+02	1.26E+03	5.79E+02	6.30E+01	1.26E+03	1.22E+03	2.24E+02	1.26E+03	1.52E+03	2.00E+02	1.26E+03	1.56E+03
1.28E+03	7.42E+02	9.94E+01	1.28E+03	1.34E+03	6.72E+01	1.28E+03	7.77E+02	1.40E+02	1.28E+03	2.91E+02	1.00E+02	1.28E+03	2.07E+02	1.50E+02	1.28E+03	1.51E+03	1.10E+02	1.28E+03	7.22E+02	6.18E+01	1.28E+03	2.84E+02	1.37E+02	1.28E+03	6.78E+02	8.67E+01	1.28E+03	5.39E+02	6.47E+01	1.28E+03	6.53E+02	9.53E+01	1.28E+03	9.97E+02	2.60E+02	1.28E+03	6.90E+02	2.53E+02	1.28E+03	5.83E+02	6.36E+01	1.28E+03	1.22E+03	2.27E+02	1.28E+03	1.51E+03	1.95E+02	1.28E+03	1.55E+03
1.29E+03	7.39E+02	1.00E+02	1.29E+03	1.33E+03	6.36E+01	1.29E+03	7.84E+02	1.42E+02	1.29E+03	2.91E+02	1.02E+02	1.29E+03	2.10E+02	1.47E+02	1.29E+03	1.51E+03	1.13E+02	1.29E+03	7.27E+02	6.90E+01	1.29E+03	2.82E+02	1.40E+02	1.29E+03	6.76E+02	8.47E+01	1.29E+03	5.37E+02	7.03E+01	1.29E+03	6.55E+02	9.50E+01	1.29E+03	9.93E+02	2.63E+02	1.29E+03	6.87E+02	2.48E+02	1.29E+03	5.87E+02	6.05E+01	1.29E+03	1.22E+03	2.23E+02	1.29E+03	1.51E+03	1.91E+02	1.29E+03	1.55E+03
1.31E+03	7.33E+02	1.00E+02	1.31E+03	1.33E+03	6.58E+01	1.31E+03	7.88E+02	1.45E+02	1.31E+03	2.91E+02	1.02E+02	1.31E+03	2.13E+02	1.44E+02	1.31E+03	1.50E+03	1.15E+02	1.31E+03	7.29E+02	6.99E+01	1.31E+03	2.79E+02	1.45E+02	1.31E+03	6.73E+02	8.20E+01	1.31E+03	5.35E+02	7.40E+01	1.31E+03	6.59E+02	9.38E+01	1.31E+03	9.86E+02	2.66E+02	1.31E+03	6.83E+02	2.45E+02	1.31E+03	5.91E+02	5.45E+01	1.31E+03	1.22E+03	2.22E+02	1.31E+03	1.51E+03	1.90E+02	1.31E+03	1.55E+03
1.32E+03	7.28E+02	1.01E+02	1.32E+03	1.32E+03	7.00E+01	1.32E+03	7.93E+02	1.49E+02	1.32E+03	2.91E+02	1.01E+02	1.32E+03	2.16E+02	1.41E+02	1.32E+03	1.50E+03	1.21E+02	1.32E+03	7.33E+02	7.09E+01	1.32E+03	2.77E+02	1.52E+02	1.32E+03	6.71E+02	8.14E+01	1.32E+03	5.33E+02	7.65E+01	1.32E+03	6.70E+02	9.38E+01	1.32E+03	9.82E+02	2.69E+02	1.32E+03	6.81E+02	2.41E+02	1.32E+03	5.97E+02	5.23E+01	1.32E+03	1.22E+03	2.20E+02	1.32E+03	1.50E+03	1.94E+02	1.32E+03	1.55E+03
1.34E+03	7.24E+02	1.03E+02	1.34E+03	1.31E+03	7.12E+01	1.34E+03	7.99E+02	1.52E+02	1.34E+03	2.92E+02	1.01E+02	1.34E+03	2.18E+02	1.40E+02	1.34E+03	1.50E+03	1.21E+02	1.34E+03	7.38E+02	7.57E+01	1.34E+03	2.69E+02	1.53E+02	1.34E+03	6.68E+02	8.19E+01	1.34E+03	5.33E+02	7.66E+01	1.34E+03	6.80E+02	9.30E+01	1.34E+03	9.80E+02	2.71E+02	1.34E+03	6.81E+02	2.37E+02	1.34E+03	6.01E+02	5.61E+01	1.34E+03	1.23E+03	2.20E+02	1.34E+03	1.50E+03	1.99E+02	1.34E+03	1.55E+03
1.35E+03	7.21E+02	1.05E+02	1.35E+03	1.31E+03	7.64E+01	1.35E+03	8.03E+02	1.56E+02	1.35E+03	2.93E+02	9.99E+01	1.35E+03	2.22E+02	1.37E+02	1.35E+03	1.49E+03	1.22E+02	1.35E+03	7.35E+02	8.06E+01	1.35E+03	2.65E+02	1.52E+02	1.35E+03	6.65E+02	8.28E+01	1.35E+03	5.35E+02	7.83E+01	1.35E+03	6.86E+02	8.44E+01	1.35E+03	9.71E+02	2.69E+02	1.35E+03	6.84E+02	2.34E+02	1.35E+03	5.99E+02	5.98E+01	1.35E+03	1.23E+03	2.18E+02	1.35E+03	1.50E+03	2.05E+02	1.35E+03	1.54E+03
1.37E+03	7.19E+02	1.08E+02	1.37E+03	1.30E+03	8.07E+01	1.37E+03	8.08E+02	1.57E+02	1.37E+03	2.94E+02	1.00E+02	1.37E+03	2.22E+02	1.36E+02	1.37E+03	1.49E+03	1.26E+02	1.37E+03	7.32E+02	8.43E+01	1.37E+03	2.60E+02	1.53E+02	1.37E+03	6.61E+02	8.65E+01	1.37E+03	5.37E+02	8.13E+01	1.37E+03	6.86E+02	8.00E+01	1.37E+03	9.68E+02	2.72E+02	1.37E+03	6.90E+02	2.31E+02	1.37E+03	5.94E+02	6.51E+01	1.37E+03	1.23E+03	2.16E+02	1.37E+03	1.50E+03	2.05E+02	1.37E+03	1.54E+03
1.38E+03	7.18E+02	1.11E+02	1.38E+03	1.30E+03	8.77E+01	1.38E+03	8.11E+02	1.54E+02	1.38E+03	2.94E+02	1.06E+02	1.38E+03	2.21E+02	1.35E+02	1.38E+03	1.49E+03	1.30E+02	1.38E+03	7.34E+02	8.76E+01	1.38E+03	2.54E+02	1.52E+02	1.38E+03	6.58E+02	8.75E+01	1.38E+03	5.37E+02	8.31E+01	1.38E+03	6.83E+02	7.97E+01	1.38E+03	9.65E+02	2.75E+02	1.38E+03	6.94E+02	2.30E+02	1.38E+03	5.92E+02	6.59E+01	1.38E+03	1.24E+03	2.13E+02	1.38E+03	1.49E+03	2.05E+02	1.38E+03	1.53E+03
1.40E+03	7.18E+02	1.13E+02	1.40E+03	1.30E+03	9.52E+01	1.40E+03	8.16E+02	1.50E+02	1.40E+03	2.97E+02	1.08E+02	1.40E+03	2.21E+02	1.34E+02	1.40E+03	1.49E+03	1.28E+02	1.40E+03	7.38E+02	9.33E+01	1.40E+03	2.48E+02	1.52E+02	1.40E+03	6.56E+02	8.89E+01	1.40E+03	5.40E+02	8.65E+01	1.40E+03	6.81E+02	7.61E+01	1.40E+03	9.64E+02	2.81E+02	1.40E+03	6.98E+02	2.31E+02	1.40E+03	5.95E+02	6.97E+01	1.40E+03	1.24E+03	2.12E+02	1.40E+03	1.48E+03	2.05E+02	1.40E+03	1.53E+03
1.41E+03	7.19E+02	1.14E+02	1.41E+03	1.30E+03	1.01E+02	1.41E+03	8.18E+02	1.46E+02	1.41E+03	2.97E+02	1.10E+02	1.41E+03	2.22E+02	1.31E+02	1.41E+03	1.50E+03	1.24E+02	1.41E+03	7.41E+02	9.61E+01	1.41E+03	2.44E+02	1.56E+02	1.41E+03	6.51E+02	9.12E+01	1.41E+03	5.45E+02	8.70E+01	1.41E+03	6.81E+02	7.52E+01	1.41E+03	9.60E+02	2.86E+02	1.41E+03	7.03E+02	2.30E+02	1.41E+03	5.97E+02	7.54E+01	1.41E+03	1.24E+03	2.12E+02	1.41E+03	1.48E+03	2.08E+02	1.41E+03	1.52E+03
1.43E+03	7.21E+02	1.16E+02	1.43E+03	1.30E+03	1.08E+02	1.43E+03	8.21E+02	1.44E+02	1.43E+03	2.95E+02	1.13E+02	1.43E+03	2.28E+02	1.31E+02	1.43E+03	1.51E+03	1.22E+02	1.43E+03	7.51E+02	9.92E+01	1.43E+03	2.40E+02	1.59E+02	1.43E+03	6.47E+02	9.54E+01	1.43E+03	5.47E+02	8.67E+01	1.43E+03	6.81E+02	7.42E+01	1.43E+03	9.56E+02	2.88E+02	1.43E+03	7.07E+02	2.34E+02	1.43E+03	6.04E+02	8.08E+01	1.43E+03	1.24E+03	2.09E+02	1.43E+03	1.48E+03	2.10E+02	1.43E+03	1.52E+03
1.44E+03	7.23E+02	1.18E+02	1.44E+03	1.31E+03	1.16E+02	1.44E+03	8.25E+02	1.40E+02	1.44E+03	2.90E+02	1.18E+02	1.44E+03	2.25E+02	1.32E+02	1.44E+03	1.51E+03	1.21E+02	1.44E+03	7.60E+02	1.02E+02	1.44E+03	2.37E+02	1.61E+02	1.44E+03	6.44E+02	9.86E+01	1.44E+03	5.46E+02	8.54E+01	1.44E+03	6.73E+02	7.74E+01	1.44E+03	9.56E+02	2.94E+02	1.44E+03	7.13E+02	2.39E+02	1.44E+03	6.13E+02	8.36E+01	1.44E+03	1.24E+03	2.06E+02	1.44E+03	1.48E+03	2.09E+02	1.44E+03	1.52E+03
1.46E+03	7.30E+02	1.18E+02	1.46E+03	1.31E+03	1.16E+02	1.46E+03	8.29E+02	1.37E+02	1.46E+03	2.89E+02	1.21E+02	1.46E+03	2.28E+02	1.29E+02	1.46E+03	1.51E+03	1.21E+02	1.46E+03	7.66E+02	1.03E+02	1.46E+03	2.35E+02	1.62E+02	1.46E+03	6.47E+02	9.99E+01	1.46E+03	5.45E+02	8.46E+01	1.46E+03	6.70E+02	7.89E+01	1.46E+03	9.53E+02	3.01E+02	1.46E+03	7.13E+02	2.46E+02	1.46E+03	6.16E+02	8.63E+01	1.46E+03	1.24E+03	2.05E+02	1.46E+03	1.48E+03	2.05E+02	1.46E+03	1.52E+03
1.47E+03	7.34E+02	1.11E+02	1.47E+03	1.32E+03	1.17E+02	1.47E+03	8.34E+02	1.39E+02	1.47E+03	2.87E+02	1.23E+02	1.47E+03	2.31E+02	1.27E+02	1.47E+03	1.51E+03	1.22E+02	1.47E+03	7.74E+02	1.05E+02	1.47E+03	2.30E+02	1.61E+02	1.47E+03	6.50E+02	1.01E+02	1.47E+03	5.38E+02	8.54E+01	1.47E+03	6.70E+02	8.39E+01	1.47E+03	9.50E+02	3.05E+02	1.47E+03	7.15E+02	2.53E+02	1.47E+03	6.22E+02	9.13E+01	1.47E+03	1.24E+03	2.01E+02	1.47E+03	1.48E+03	2.04E+02	1.47E+03	1.52E+03
1.49E+03	7.38E+02	1.06E+02	1.49E+03	1.32E+03	1.19E+02	1.49E+03	8.35E+02	1.42E+02	1.49E+03	2.85E+02	1.24E+02	1.49E+03	2.33E+02	1.26E+02	1.49E+03	1.50E+03	1.25E+02	1.49E+03	7.78E+02	1.06E+02	1.49E+03	2.30E+02	1.58E+02	1.49E+03	6.54E+02	1.00E+02	1.49E+03	5.32E+02	8.75E+01	1.49E+03	6.68E+02	8.61E+01	1.49E+03	9.45E+02	3.06E+02	1.49E+03	7.18E+02	2.57E+02	1.49E+03	6.22E+02	9.63E+01	1.49E+03	1.24E+03	2.00E+02	1.49E+03	1.47E+03	2.03E+02	1.49E+03	1.52E+03
1.50E+03	7.43E+02	1.05E+02	1.50E+03	1.33E+03	1.19E+02	1.50E+03	8.33E+02	1.47E+02	1.50E+03	2.80E+02	1.26E+02	1.50E+03	2.34E+02	1.26E+02	1.50E+03	1.50E+03	1.24E+02	1.50E+03	7.81E+02	1.06E+02	1.50E+03	2.28E+02	1.53E+02	1.50E+03	6.57E+02	1.01E+02	1.50E+03	5.26E+02	9.09E+01	1.50E+03	6.67E+02	8.94E+01	1.50E+03	9.42E+02	3.09E+02	1.50E+03	7.22E+02	2.59E+02	1.50E+03	6.20E+02	9.95E+01	1.50E+03	1.24E+03	1.99E+02	1.50E+03	1.47E+03	1.98E+02	1.50E+03	1.52E+03
1.52E+03	7.50E+02	1.02E+02	1.52E+03	1.33E+03	1.17E+02	1.52E+03	8.31E+02	1.54E+02	1.52E+03	2.76E+02	1.30E+02	1.52E+03	2.35E+02	1.25E+02	1.52E+03	1.49E+03	1.24E+02	1.52E+03	7.82E+02	1.07E+02	1.52E+03	2.26E+02	1.48E+02	1.52E+03	6.57E+02	1.02E+02	1.52E+03	5.16E+02	8.95E+01	1.52E+03	6.68E+02	9.46E+01	1.52E+03	9.41E+02	3.17E+02	1.52E+03	7.23E+02	2.59E+02	1.52E+03	6.17E+02	9.89E+01	1.52E+03	1.24E+03	1.99E+02	1.52E+03	1.47E+03	1.95E+02	1.52E+03	1.52E+03
1.53E+03	7.53E+02	9.96E+01	1.53E+03	1.32E+03	1.10E+02	1.53E+03	8.32E+02	1.61E+02	1.53E+03	2.72E+02	1.37E+02	1.53E+03	2.36E+02	1.26E+02	1.53E+03	1.49E+03	1.25E+02	1.53E+03	7.85E+02	1.10E+02	1.53E+03	2.24E+02	1.42E+02	1.53E+03	6.58E+02	1.01E+02	1.53E+03	5.11E+02	9.22E+01	1.53E+03	6.68E+02	9.96E+01	1.53E+03	9.40E+02	3.21E+02	1.53E+03	7.24E+02	2.61E+02	1.53E+03	6.15E+02	9.78E+01	1.53E+03	1.24E+03	1.98E+02	1.53E+03	1.46E+03	1.90E+02	1.53E+03	1.52E+03
1.55E+03	7.62E+02	9.58E+01	1.55E+03	1.32E+03	1.07E+02	1.55E+03	8.37E+02	1.67E+02	1.55E+03	2.71E+02	1.41E+02	1.55E+03	2.37E+02	1.26E+02	1.55E+03	1.48E+03	1.28E+02	1.55E+03	7.90E+02	1.11E+02	1.55E+03	2.24E+02	1.38E+02	1.55E+03	6.57E+02	1.03E+02	1.55E+03	5.04E+02	9.26E+01	1.55E+03	6.68E+02	1.01E+02	1.55E+03	9.43E+02	3.23E+02	1.55E+03	7.29E+02	2.68E+02	1.55E+03	6.08E+02	9.90E+01	1.55E+03	1.23E+03	1.99E+02	1.55E+03	1.46E+03	1.85E+02	1.55E+03	1.52E+03
1.56E+03	7.67E+02	9.97E+01	1.56E+03	1.31E+03	1.10E+02	1.56E+03	8.44E+02	1.67E+02	1.56E+03	2.74E+02	1.50E+02	1.56E+03	2.38E+02	1.28E+02	1.56E+03	1.49E+03	1.34E+02	1.56E+03	7.98E+02	1.13E+02	1.56E+03	2.27E+02	1.31E+02	1.56E+03	6.55E+02	1.08E+02	1.56E+03	4.96E+02	8.93E+01	1.56E+03	6.67E+02	1.03E+02	1.56E+03	9.52E+02	3.25E+02	1.56E+03	7.30E+02	2.69E+02	1.56E+03	6.02E+02	1.03E+02	1.56E+03	1.23E+03	2.00E+02	1.56E+03	1.46E+03	1.80E+02	1.56E+03	1.52E+03
1.58E+03	7.72E+02	1.04E+02	1.58E+03	1.30E+03	1.16E+02	1.58E+03	8.53E+02	1.65E+02	1.58E+03	2.66E+02	1.53E+02	1.58E+03	2.38E+02	1.30E+02	1.58E+03	1.49E+03	1.41E+02	1.58E+03	8.03E+02	1.13E+02	1.58E+03	2.28E+02	1.25E+02	1.58E+03	6.54E+02	1.11E+02	1.58E+03	4.92E+02	8.59E+01	1.58E+03	6.64E+02	1.06E+02	1.58E+03	9.57E+02	3.29E+02	1.58E+03	7.32E+02	2.70E+02	1.58E+03	5.99E+02	1.13E+02	1.58E+03	1.23E+03	2.01E+02	1.58E+03	1.46E+03	1.75E+02	1.58E+03	1.52E+03
1.59E+03	7.75E+02	1.09E+02	1.59E+03	1.30E+03	1.19E+02	1.59E+03	8.60E+02	1.62E+02	1.59E+03	2.63E+02	1.55E+02	1.59E+03	2.39E+02	1.30E+02	1.59E+03	1.49E+03	1.48E+02	1.59E+03	8.07E+02	1.10E+02	1.59E+03	2.26E+02	1.18E+02	1.59E+03	6.54E+02	1.11E+02	1.59E+03	4.86E+02	8.16E+01	1.59E+03	6.64E+02	1.11E+02	1.59E+03	9.60E+02	3.31E+02	1.59E+03	7.34E+02	2.71E+02	1.59E+03	5.97E+02	1.17E+02	1.59E+03	1.23E+03	2.03E+02	1.59E+03	1.46E+03	1.73E+02	1.59E+03	1.52E+03
1.61E+03	7.79E+02	1.16E+02	1.61E+03	1.30E+03	1.20E+02	1.61E+03	8.66E+02	1.62E+02	1.61E+03	2.61E+02	1.59E+02	1.61E+03	2.41E+02	1.36E+02	1.61E+03	1.48E+03	1.51E+02	1.61E+03	8.12E+02	1.07E+02	1.61E+03	2.25E+02	1.14E+02	1.61E+03	6.54E+02	1.13E+02	1.61E+03	4.78E+02	8.33E+01	1.61E+03	6.67E+02	1.13E+02	1.61E+03	9.63E+02	3.34E+02	1.61E+03	7.36E+02	2.76E+02	1.61E+03	5.93E+02	1.25E+02	1.61E+03	1.23E+03	2.04E+02	1.61E+03	1.45E+03	1.71E+02	1.61E+03	1.52E+03
1.62E+03	7.82E+02	1.19E+02	1.62E+03	1.30E+03	1.20E+02	1.62E+03	8.71E+02	1.63E+02	1.62E+03	2.57E+02	1.59E+02	1.62E+03	2.44E+02	1.39E+02	1.62E+03	1.48E+03	1.51E+02	1.62E+03	8.17E+02	1.05E+02	1.62E+03	2.25E+02	1.11E+02	1.62E+03	6.53E+02	1.16E+02	1.62E+03	4.75E+02	8.56E+01	1.62E+03	6.70E+02	1.18E+02	1.62E+03	9.68E+02	3.35E+02	1.62E+03	7.35E+02	2.80E+02	1.62E+03	5.97E+02	1.32E+02	1.62E+03	1.23E+03	2.05E+02	1.62E+03	1.45E+03	1.70E+02	1.62E+03	1.51E+03
1.64E+03	7.87E+02	1.20E+02	1.64E+03	1.31E+03	1.18E+02	1.64E+03	8.75E+02	1.67E+02	1.64E+03	2.49E+02	1.59E+02	1.64E+03	2.49E+02	1.42E+02	1.64E+03	1.47E+03	1.47E+02	1.64E+03	8.21E+02	1.02E+02	1.64E+03	2.29E+02	1.05E+02	1.64E+03	6.51E+02	1.17E+02	1.64E+03	4.70E+02	8.63E+01	1.64E+03	6.73E+02	1.19E+02	1.64E+03	9.75E+02	3.36E+02	1.64E+03	7.36E+02	2.86E+02	1.64E+03	5.99E+02	1.35E+02	1.64E+03	1.23E+03	2.08E+02	1.64E+03	1.45E+03	1.65E+02	1.64E+03	1.50E+03
1.65E+03	7.95E+02	1.21E+02	1.65E+03	1.31E+03	1.18E+02	1.65E+03	8.79E+02	1.70E+02	1.65E+03	2.41E+02	1.59E+02	1.65E+03	2.49E+02	1.46E+02	1.65E+03	1.47E+03	1.43E+02	1.65E+03	8.27E+02	1.02E+02	1.65E+03	2.28E+02	9.97E+01	1.65E+03	6.51E+02	1.18E+02	1.65E+03	4.68E+02	9.56E+01	1.65E+03	6.73E+02	1.23E+02	1.65E+03	9.80E+02	3.36E+02	1.65E+03	7.38E+02	2.92E+02	1.65E+03	6.03E+02	1.38E+02	1.65E+03	1.23E+03	2.11E+02	1.65E+03	1.45E+03	1.61E+02	1.65E+03	1.50E+03
1.67E+03	8.00E+02	1.21E+02	1.67E+03	1.32E+03	1.19E+02	1.67E+03	8.84E+02	1.72E+02	1.67E+03	2.34E+02	1.56E+02	1.67E+03	2.46E+02	1.47E+02	1.67E+03	1.46E+03	1.36E+02	1.67E+03	8.32E+02	1.00E+02	1.67E+03	2.31E+02	9.97E+01	1.67E+03	6.47E+02	1.16E+02	1.67E+03	4.65E+02	1.01E+02	1.67E+03	6.73E+02	1.28E+02	1.67E+03	9.82E+02	3.34E+02	1.67E+03	7.36E+02	2.96E+02	1.67E+03	6.09E+02	1.44E+02	1.67E+03	1.23E+03	2.13E+02	1.67E+03	1.45E+03	1.57E+02	1.67E+03	1.49E+03
1.68E+03	8.05E+02	1.23E+02	1.68E+03	1.32E+03	1.23E+02	1.68E+03	8.85E+02	1.74E+02	1.68E+03	2.26E+02	1.52E+02	1.68E+03	2.40E+02	1.50E+02	1.68E+03	1.46E+03	1.34E+02	1.68E+03	8.37E+02	9.68E+01	1.68E+03	2.34E+02	9.97E+01	1.68E+03	6.43E+02	1.13E+02	1.68E+03	4.59E+02	1.03E+02	1.68E+03	6.72E+02	1.32E+02	1.68E+03	9.85E+02	3.29E+02	1.68E+03	7.33E+02	3.02E+02	1.68E+03	6.15E+02	1.49E+02	1.68E+03	1.23E+03	2.14E+02	1.68E+03	1.45E+03	1.53E+02	1.68E+03	1.48E+03
1.70E+03	8.10E+02	1.24E+02	1.70E+03	1.32E+03	1.29E+02	1.70E+03	8.84E+02	1.77E+02	1.70E+03	2.21E+02	1.46E+02	1.70E+03	2.35E+02	1.50E+02	1.70E+03	1.45E+03	1.39E+02	1.70E+03	8.44E+02	9.44E+01	1.70E+03	2.30E+02	9.68E+01	1.70E+03	6.39E+02	1.13E+02	1.70E+03	4.55E+02	9.86E+01	1.70E+03	6.70E+02	1.37E+02	1.70E+03	9.87E+02	3.29E+02	1.70E+03	7.33E+02	3.07E+02	1.70E+03	6.17E+02	1.52E+02	1.70E+03	1.23E+03	2.12E+02	1.70E+03	1.45E+03	1.50E+02	1.70E+03	1.48E+03
1.71E+03	8.13E+02	1.21E+02	1.71E+03	1.33E+03	1.33E+02	1.71E+03	8.83E+02	1.79E+02	1.71E+03	2.11E+02	1.46E+02	1.71E+03	2.30E+02	1.51E+02	1.71E+03	1.44E+03	1.38E+02	1.71E+03	8.50E+02	9.25E+01	1.71E+03	2.30E+02	8.80E+01	1.71E+03	6.35E+02	1.15E+02	1.71E+03	4.52E+02	9.66E+01	1.71E+03	6.63E+02	1.33E+02	1.71E+03	9.96E+02	3.27E+02	1.71E+03	7.31E+02	3.12E+02	1.71E+03	6.18E+02	1.53E+02	1.71E+03	1.24E+03	2.11E+02	1.71E+03	1.45E+03	1.47E+02	1.71E+03	1.47E+03
1.73E+03	8.17E+02	1.15E+02	1.73E+03	1.33E+03	1.37E+02	1.73E+03	8.80E+02	1.82E+02	1.73E+03	2.03E+02	1.46E+02	1.73E+03	2.25E+02	1.55E+02	1.73E+03	1.44E+03	1.33E+02	1.73E+03	8.56E+02	9.01E+01	1.73E+03	2.28E+02	8.23E+01	1.73E+03	6.31E+02	1.17E+02	1.73E+03	4.48E+02	9.63E+01	1.73E+03	6.59E+02	1.33E+02	1.73E+03	1.00E+03	3.22E+02	1.73E+03	7.30E+02	3.16E+02	1.73E+03	6.22E+02	1.57E+02	1.73E+03	1.24E+03	2.10E+02	1.73E+03	1.45E+03	1.45E+02	1.73E+03	1.47E+03
1.74E+03	8.19E+02	1.09E+02	1.74E+03	1.34E+03	1.43E+02	1.74E+03	8.78E+02	1.84E+02	1.74E+03	1.96E+02	1.55E+02	1.74E+03	2.19E+02	1.51E+02	1.74E+03	1.43E+03	1.28E+02	1.74E+03	8.59E+02	8.62E+01	1.74E+03	2.21E+02	8.15E+01	1.74E+03	6.24E+02	1.18E+02	1.74E+03	4.48E+02	9.03E+01	1.74E+03	6.53E+02	1.36E+02	1.74E+03	1.01E+03	3.16E+02	1.74E+03	7.23E+02	3.19E+02	1.74E+03	6.22E+02	1.60E+02	1.74E+03	1.24E+03	2.10E+02	1.74E+03	1.45E+03	1.43E+02	1.74E+03	1.46E+03
1.76E+03	8.18E+02	1.03E+02	1.76E+03	1.34E+03	1.52E+02	1.76E+03	8.75E+02	1.87E+02	1.76E+03	1.89E+02	1.62E+02	1.76E+03	2.12E+02	1.55E+02	1.76E+03	1.43E+03	1.28E+02	1.76E+03	8.61E+02	8.17E+01	1.76E+03	2.17E+02	8.50E+01	1.76E+03	6.19E+02	1.17E+02	1.76E+03	4.50E+02	8.32E+01	1.76E+03	6.49E+02	1.35E+02	1.76E+03	1.01E+03	3.14E+02	1.76E+03	7.21E+02	3.18E+02	1.76E+03	6.23E+02	1.63E+02	1.76E+03	1.24E+03	2.09E+02	1.76E+03	1.44E+03	1.46E+02	1.76E+03	1.45E+03
1.77E+03	8.14E+02	9.92E+01	1.77E+03	1.34E+03	1.58E+02	1.77E+03	8.74E+02	1.90E+02	1.77E+03	1.80E+02	1.63E+02	1.77E+03	2.05E+02	1.59E+02	1.77E+03	1.43E+03	1.32E+02	1.77E+03	8.65E+02	7.24E+01	1.77E+03	2.14E+02	9.21E+01	1.77E+03	6.18E+02	1.13E+02	1.77E+03	4.51E+02	8.06E+01	1.77E+03	6.48E+02	1.30E+02	1.77E+03	1.01E+03	3.12E+02	1.77E+03	7.16E+02	3.10E+02	1.77E+03	6.23E+02	1.68E+02	1.77E+03	1.24E+03	2.09E+02	1.77E+03	1.44E+03	1.49E+02	1.77E+03	1.45E+03
1.79E+03	8.08E+02	9.52E+01	1.79E+03	1.34E+03	1.57E+02	1.79E+03	8.74E+02	1.92E+02	1.79E+03	1.72E+02	1.69E+02	1.79E+03	2.00E+02	1.65E+02	1.79E+03	1.43E+03	1.34E+02	1.79E+03	8.69E+02	6.63E+01	1.79E+03	2.17E+02	1.00E+02	1.79E+03	6.18E+02	1.07E+02	1.79E+03	4.51E+02	8.03E+01	1.79E+03	6.51E+02	1.22E+02	1.79E+03	1.02E+03	3.10E+02	1.79E+03	7.12E+02	3.07E+02	1.79E+03	6.24E+02	1.69E+02	1.79E+03	1.24E+03	2.08E+02	1.79E+03	1.43E+03	1.52E+02	1.79E+03	1.44E+03
1.80E+03	8.05E+02	8.94E+01	1.80E+03	1.35E+03	1.54E+02	1.80E+03	8.71E+02	1.94E+02	1.80E+03	1.71E+02	1.72E+02	1.80E+03	1.93E+02	1.62E+02	1.80E+03	1.42E+03	1.30E+02	1.80E+03	8.71E+02	5.68E+01	1.80E+03	2.18E+02	1.07E+02	1.80E+03	6.19E+02	1.04E+02	1.80E+03	4.54E+02	8.14E+01	1.80E+03	6.53E+02	1.18E+02	1.80E+03	1.02E+03	3.07E+02	1.80E+03	7.10E+02	3.02E+02	1.80E+03	6.24E+02	1.70E+02	1.80E+03	1.24E+03	2.07E+02	1.80E+03	1.43E+03	1.51E+02	1.80E+03	1.44E+03
1.82E+03	8.01E+02	8.44E+01	1.82E+03	1.35E+03	1.49E+02	1.82E+03	8.68E+02	1.93E+02	1.82E+03	1.66E+02	1.74E+02	1.82E+03	1.92E+02	1.57E+02	1.82E+03	1.42E+03	1.27E+02	1.82E+03	8.75E+02	5.31E+01	1.82E+03	2.10E+02	1.06E+02	1.82E+03	6.20E+02	1.00E+02	1.82E+03	4.54E+02	8.11E+01	1.82E+03	6.55E+02	1.12E+02	1.82E+03	1.03E+03	2.99E+02	1.82E+03	7.02E+02	3.03E+02	1.82E+03	6.28E+02	1.70E+02	1.82E+03	1.24E+03	2.04E+02	1.82E+03	1.42E+03	1.52E+02	1.82E+03	1.43E+03
1.83E+03	7.96E+02	7.81E+01	1.83E+03	1.35E+03	1.43E+02	1.83E+03	8.64E+02	1.98E+02	1.83E+03	1.59E+02	1.76E+02	1.83E+03	1.95E+02	1.53E+02	1.83E+03	1.41E+03	1.27E+02	1.83E+03	8.82E+02	5.55E+01	1.83E+03	2.04E+02	1.00E+02	1.83E+03	6.24E+02	9.69E+01	1.83E+03	4.57E+02	7.57E+01	1.83E+03	6.59E+02	1.05E+02	1.83E+03	1.03E+03	2.92E+02	1.83E+03	7.00E+02	3.08E+02	1.83E+03	6.32E+02	1.72E+02	1.83E+03	1.24E+03	2.04E+02	1.83E+03	1.42E+03	1.52E+02	1.83E+03	1.43E+03
1.85E+03	7.93E+02	7.20E+01	1.85E+03	1.35E+03	1.40E+02	1.85E+03	8.62E+02	1.99E+02	1.85E+03	1.50E+02	1.80E+02	1.85E+03	2.02E+02	1.54E+02	1.85E+03	1.40E+03	1.23E+02	1.85E+03	8.83E+02	5.64E+01	1.85E+03	1.99E+02	9.74E+01	1.85E+03	6.29E+02	9.21E+01	1.85E+03	4.57E+02	7.07E+01	1.85E+03	6.62E+02	1.02E+02	1.85E+03	1.02E+03	2.84E+02	1.85E+03	6.95E+02	3.16E+02	1.85E+03	6.37E+02	1.75E+02	1.85E+03	1.24E+03	2.04E+02	1.85E+03	1.41E+03	1.54E+02	1.85E+03	1.42E+03
1.86E+03	7.92E+02	6.47E+01	1.86E+03	1.34E+03	1.33E+02	1.86E+03	8.56E+02	2.02E+02	1.86E+03	1.51E+02	1.87E+02	1.86E+03	2.05E+02	1.52E+02	1.86E+03	1.40E+03	1.20E+02	1.86E+03	8.83E+02	5.98E+01	1.86E+03	2.00E+02	9.05E+01	1.86E+03	6.32E+02	8.89E+01	1.86E+03	4.58E+02	6.64E+01	1.86E+03	6.67E+02	9.92E+01	1.86E+03	1.02E+03	2.78E+02	1.86E+03	6.94E+02	3.20E+02	1.86E+03	6.41E+02	1.77E+02	1.86E+03	1.24E+03	2.06E+02	1.86E+03	1.41E+03	1.55E+02	1.86E+03	1.42E+03
1.88E+03	7.91E+02	5.88E+01	1.88E+03	1.34E+03	1.30E+02	1.88E+03	8.51E+02	2.05E+02	1.88E+03	1.54E+02	1.95E+02	1.88E+03	2.13E+02	1.51E+02	1.88E+03	1.39E+03	1.17E+02	1.88E+03	8.84E+02	5.97E+01	1.88E+03	2.06E+02	8.54E+01	1.88E+03	6.35E+02	8.50E+01	1.88E+03	4.59E+02	6.19E+01	1.88E+03	6.69E+02	9.88E+01	1.88E+03	1.02E+03	2.75E+02	1.88E+03	6.94E+02	3.25E+02	1.88E+03	6.44E+02	1.77E+02	1.88E+03	1.24E+03	2.07E+02	1.88E+03	1.40E+03	1.54E+02	1.88E+03	1.41E+03
1.89E+03	7.90E+02	5.79E+01	1.89E+03	1.34E+03	1.30E+02	1.89E+03	8.50E+02	2.09E+02	1.89E+03	1.56E+02	2.04E+02	1.89E+03	2.18E+02	1.54E+02	1.89E+03	1.39E+03	1.13E+02	1.89E+03	8.84E+02	6.03E+01	1.89E+03	2.08E+02	8.27E+01	1.89E+03	6.36E+02	7.88E+01	1.89E+03	4.57E+02	5.52E+01	1.89E+03	6.75E+02	9.75E+01	1.89E+03	1.01E+03	2.73E+02	1.89E+03	6.98E+02	3.27E+02	1.89E+03	6.44E+02	1.77E+02	1.89E+03	1.23E+03	2.08E+02	1.89E+03	1.40E+03	1.55E+02	1.89E+03	1.41E+03
1.91E+03	7.87E+02	5.74E+01	1.91E+03	1.33E+03	1.35E+02	1.91E+03	8.49E+02	2.14E+02	1.91E+03	1.55E+02	2.08E+02	1.91E+03	2.21E+02	1.59E+02	1.91E+03	1.38E+03	1.14E+02	1.91E+03	8.83E+02	5.76E+01	1.91E+03	2.12E+02	8.06E+01	1.91E+03	6.36E+02	7.64E+01	1.91E+03	4.53E+02	5.35E+01	1.91E+03	6.80E+02	1.00E+02	1.91E+03	1.00E+03	2.72E+02	1.91E+03	7.01E+02	3.30E+02	1.91E+03	6.44E+02	1.77E+02	1.91E+03	1.23E+03	2.09E+02	1.91E+03	1.39E+03	1.55E+02	1.91E+03	1.40E+03
1.92E+03	7.85E+02	5.81E+01	1.92E+03	1.33E+03	1.39E+02	1.92E+03	8.49E+02	2.15E+02	1.92E+03	1.58E+02	2.10E+02	1.92E+03	2.21E+02	1.65E+02	1.92E+03	1.38E+03	1.18E+02	1.92E+03	8.83E+02	5.70E+01	1.92E+03	2.12E+02	7.85E+01	1.92E+03	6.38E+02	7.35E+01	1.92E+03	4.50E+02	5.50E+01	1.92E+03	6.80E+02	1.03E+02	1.92E+03	1.00E+03	2.73E+02	1.92E+03	7.05E+02	3.30E+02	1.92E+03	6.44E+02	1.77E+02	1.92E+03	1.23E+03	2.11E+02	1.92E+03	1.39E+03	1.56E+02	1.92E+03	1.40E+03
1.94E+03	7.81E+02	5.93E+01	1.94E+03	1.33E+03	1.38E+02	1.94E+03	8.51E+02	2.18E+02	1.94E+03	1.64E+02	2.17E+02	1.94E+03	2.21E+02	1.65E+02	1.94E+03	1.38E+03	1.23E+02	1.94E+03	8.83E+02	5.86E+01	1.94E+03	2.11E+02	7.34E+01	1.94E+03	6.43E+02	7.16E+01	1.94E+03	4.46E+02	5.72E+01	1.94E+03	6.81E+02	1.09E+02	1.94E+03	9.97E+02	2.74E+02	1.94E+03	7.09E+02	3.31E+02	1.94E+03	6.45E+02	1.76E+02	1.94E+03	1.23E+03	2.12E+02	1.94E+03	1.39E+03	1.58E+02	1.94E+03	1.39E+03
1.95E+03	7.77E+02	6.40E+01	1.95E+03	1.33E+03	1.36E+02	1.95E+03	8.52E+02	2.22E+02	1.95E+03	1.67E+02	2.24E+02	1.95E+03	2.22E+02	1.65E+02	1.95E+03	1.38E+03	1.27E+02	1.95E+03	8.83E+02	5.88E+01	1.95E+03	2.06E+02	6.81E+01	1.95E+03	6.51E+02	7.06E+01	1.95E+03	4.41E+02	5.50E+01	1.95E+03	6.85E+02	1.12E+02	1.95E+03	9.96E+02	2.75E+02	1.95E+03	7.13E+02	3.25E+02	1.95E+03	6.46E+02	1.74E+02	1.95E+03	1.23E+03	2.15E+02	1.95E+03	1.38E+03	1.59E+02	1.95E+03	1.38E+03
1.97E+03	7.73E+02	6.99E+01	1.97E+03	1.32E+03	1.35E+02	1.97E+03	8.52E+02	2.27E+02	1.97E+03	1.70E+02	2.28E+02	1.97E+03	2.24E+02	1.65E+02	1.97E+03	1.37E+03	1.29E+02	1.97E+03	8.83E+02	5.85E+01	1.97E+03	2.03E+02	6.75E+01	1.97E+03	6.54E+02	6.76E+01	1.97E+03	4.39E+02	4.87E+01	1.97E+03	6.92E+02	1.10E+02	1.97E+03	9.96E+02	2.75E+02	1.97E+03	7.14E+02	3.19E+02	1.97E+03	6.46E+02	1.73E+02	1.97E+03	1.23E+03	2.16E+02	1.97E+03	1.38E+03	1.58E+02	1.97E+03	1.38E+03
1.98E+03	7.69E+02	7.56E+01	1.98E+03	1.31E+03	1.35E+02	1.98E+03	8.54E+02	2.32E+02	1.98E+03	1.77E+02	2.26E+02	1.98E+03	2.26E+02	1.64E+02	1.98E+03	1.37E+03	1.33E+02	1.98E+03	8.83E+02	5.82E+01	1.98E+03	2.03E+02	6.43E+01	1.98E+03	6.57E+02	6.43E+01	1.98E+03	4.38E+02	4.54E+01	1.98E+03	6.97E+02	1.12E+02	1.98E+03	9.93E+02	2.77E+02	1.98E+03	7.15E+02	3.13E+02	1.98E+03	6.44E+02	1.75E+02	1.98E+03	1.23E+03	2.16E+02	1.98E+03	1.37E+03	1.57E+02	1.98E+03	1.37E+03
2.00E+03	7.64E+02	8.35E+01	2.00E+03	1.30E+03	1.38E+02	2.00E+03	8.56E+02	2.39E+02	2.00E+03	1.85E+02	2.26E+02	2.00E+03	2.29E+02	1.64E+02	2.00E+03	1.37E+03	1.34E+02	2.00E+03	8.83E+02	5.59E+01	2.00E+03	1.98E+02	6.16E+01	2.00E+03	6.56E+02	5.65E+01	2.00E+03	4.41E+02	4.31E+01	2.00E+03	7.00E+02	1.16E+02	2.00E+03	9.88E+02	2.76E+02	2.00E+03	7.17E+02	3.08E+02	2.00E+03	6.45E+02	1.75E+02	2.00E+03	1.23E+03	2.20E+02	2.00E+03	1.36E+03	1.57E+02	2.00E+03	1.37E+03
2.01E+03	7.60E+02	8.98E+01	2.01E+03	1.30E+03	1.41E+02	2.01E+03	8.57E+02	2.43E+02	2.01E+03	1.97E+02	2.28E+02	2.01E+03	2.35E+02	1.62E+02	2.01E+03	1.36E+03	1.36E+02	2.01E+03	8.82E+02	5.50E+01	2.01E+03	1.95E+02	6.05E+01	2.01E+03	6.54E+02	5.42E+01	2.01E+03	4.47E+02	4.20E+01	2.01E+03	7.00E+02	1.19E+02	2.01E+03	9.83E+02	2.77E+02	2.01E+03	7.21E+02	3.05E+02	2.01E+03	6.44E+02	1.76E+02	2.01E+03	1.23E+03	2.23E+02	2.01E+03	1.36E+03	1.57E+02	2.01E+03	1.36E+03
2.03E+03	7.56E+02	9.80E+01	2.03E+03	1.29E+03	1.39E+02	2.03E+03	8.57E+02	2.49E+02	2.03E+03	2.03E+02	2.26E+02	2.03E+03	2.38E+02	1.62E+02	2.03E+03	1.36E+03	1.40E+02	2.03E+03	8.83E+02	5.57E+01	2.03E+03	1.93E+02	5.91E+01	2.03E+03	6.49E+02	5.18E+01	2.03E+03	4.54E+02	4.16E+01	2.03E+03	6.96E+02	1.21E+02	2.03E+03	9.80E+02	2.76E+02	2.03E+03	7.24E+02	3.01E+02	2.03E+03	6.43E+02	1.72E+02	2.03E+03	1.23E+03	2.23E+02	2.03E+03	1.35E+03	1.54E+02	2.03E+03	1.35E+03
2.04E+03	7.54E+02	1.00E+02	2.04E+03	1.28E+03	1.41E+02	2.04E+03	8.57E+02	2.57E+02	2.04E+03	2.11E+02	2.20E+02	2.04E+03	2.39E+02	1.65E+02	2.04E+03	1.36E+03	1.41E+02	2.04E+03	8.84E+02	5.87E+01	2.04E+03	1.92E+02	5.70E+01	2.04E+03	6.44E+02	5.34E+01	2.04E+03	4.57E+02	4.26E+01	2.04E+03	6.93E+02	1.25E+02	2.04E+03	9.77E+02	2.74E+02	2.04E+03	7.29E+02	2.97E+02	2.04E+03	6.44E+02	1.72E+02	2.04E+03	1.23E+03	2.23E+02	2.04E+03	1.34E+03	1.51E+02	2.04E+03	1.34E+03
2.06E+03	7.48E+02	1.00E+02	2.06E+03	1.28E+03	1.44E+02	2.06E+03	8.54E+02	2.64E+02	2.06E+03	2.13E+02	2.13E+02	2.06E+03	2.45E+02	1.66E+02	2.06E+03	1.36E+03	1.43E+02	2.06E+03	8.84E+02	6.04E+01	2.06E+03	1.93E+02	5.54E+01	2.06E+03	6.39E+02	4.91E+01	2.06E+03	4.60E+02	4.53E+01	2.06E+03	6.93E+02	1.29E+02	2.06E+03	9.71E+02	2.72E+02	2.06E+03	7.34E+02	2.97E+02	2.06E+03	6.45E+02	1.72E+02	2.06E+03	1.23E+03	2.24E+02	2.06E+03	1.34E+03	1.49E+02	2.06E+03	1.34E+03
2.07E+03	7.40E+02	1.05E+02	2.07E+03	1.28E+03	1.46E+02	2.07E+03	8.53E+02	2.71E+02	2.07E+03	2.14E+02	2.07E+02	2.07E+03	2.46E+02	1.64E+02	2.07E+03	1.35E+03	1.44E+02	2.07E+03	8.83E+02	5.69E+01	2.07E+03	1.93E+02	5.45E+01	2.07E+03	6.38E+02	4.60E+01	2.07E+03	4.62E+02	4.93E+01	2.07E+03	6.92E+02	1.35E+02	2.07E+03	9.70E+02	2.72E+02	2.07E+03	7.37E+02	2.98E+02	2.07E+03	6.45E+02	1.73E+02	2.07E+03	1.23E+03	2.25E+02	2.07E+03	1.33E+03	1.48E+02	2.07E+03	1.33E+03
2.09E+03	7.35E+02	1.08E+02	2.09E+03	1.28E+03	1.46E+02	2.09E+03	8.52E+02	2.77E+02	2.09E+03	2.18E+02	2.00E+02	2.09E+03	2.50E+02	1.65E+02	2.09E+03	1.35E+03	1.43E+02	2.09E+03	8.83E+02	5.66E+01	2.09E+03	1.93E+02	5.37E+01	2.09E+03	6.37E+02	4.58E+01	2.09E+03	4.64E+02	5.12E+01	2.09E+03	6.88E+02	1.44E+02	2.09E+03	9.64E+02	2.67E+02	2.09E+03	7.42E+02	3.01E+02	2.09E+03	6.45E+02	1.75E+02	2.09E+03	1.23E+03	2.24E+02	2.09E+03	1.33E+03	1.46E+02	2.09E+03	1.33E+03
2.10E+03	7.33E+02	1.06E+02	2.10E+03	1.27E+03	1.45E+02	2.10E+03	8.50E+02	2.83E+02	2.10E+03	2.19E+02	1.95E+02	2.10E+03	2.54E+02	1.61E+02	2.10E+03	1.34E+03	1.41E+02	2.10E+03	8.83E+02	5.67E+01	2.10E+03	1.94E+02	5.23E+01	2.10E+03	6.32E+02	4.76E+01	2.10E+03	4.72E+02	5.33E+01	2.10E+03	6.91E+02	1.50E+02	2.10E+03	9.63E+02	2.62E+02	2.10E+03	7.48E+02	3.00E+02	2.10E+03	6.45E+02	1.80E+02	2.10E+03	1.23E+03	2.22E+02	2.10E+03	1.32E+03	1.47E+02	2.10E+03	1.32E+03
2.12E+03	7.30E+02	9.96E+01	2.12E+03	1.27E+03	1.44E+02	2.12E+03	8.51E+02	2.90E+02	2.12E+03	2.18E+02	1.86E+02	2.12E+03	2.57E+02	1.58E+02	2.12E+03	1.34E+03	1.40E+02	2.12E+03	8.82E+02	5.68E+01	2.12E+03	1.96E+02	5.07E+01	2.12E+03	6.29E+02	5.19E+01	2.12E+03	4.75E+02	6.26E+01	2.12E+03	6.97E+02	1.51E+02	2.12E+03	9.65E+02	2.57E+02	2.12E+03	7.49E+02	2.97E+02	2.12E+03	6.45E+02	1.81E+02	2.12E+03	1.23E+03	2.24E+02	2.12E+03	1.32E+03	1.46E+02	2.12E+03	1.31E+03
2.13E+03	7.25E+02	9.37E+01	2.13E+03	1.26E+03	1.44E+02	2.13E+03	8.50E+02	2.96E+02	2.13E+03	2.14E+02	1.80E+02	2.13E+03	2.62E+02	1.52E+02	2.13E+03	1.33E+03	1.35E+02	2.13E+03	8.83E+02	5.65E+01	2.13E+03	2.02E+02	4.72E+01	2.13E+03	6.27E+02	5.37E+01	2.13E+03	4.80E+02	6.95E+01	2.13E+03	7.05E+02	1.51E+02	2.13E+03	9.71E+02	2.50E+02	2.13E+03	7.49E+02	2.95E+02	2.13E+03	6.46E+02	1.81E+02	2.13E+03	1.22E+03	2.23E+02	2.13E+03	1.31E+03	1.47E+02	2.13E+03	1.31E+03
2.15E+03	7.20E+02	9.27E+01	2.15E+03	1.25E+03	1.41E+02	2.15E+03	8.51E+02	2.99E+02	2.15E+03	2.08E+02	1.78E+02	2.15E+03	2.65E+02	1.54E+02	2.15E+03	1.32E+03	1.33E+02	2.15E+03	8.83E+02	5.49E+01	2.15E+03	2.04E+02	4.56E+01	2.15E+03	6.22E+02	5.54E+01	2.15E+03	4.77E+02	7.57E+01	2.15E+03	7.07E+02	1.50E+02	2.15E+03	9.75E+02	2.45E+02	2.15E+03	7.50E+02	2.91E+02	2.15E+03	6.46E+02	1.81E+02	2.15E+03	1.22E+03	2.22E+02	2.15E+03	1.31E+03	1.48E+02	2.15E+03	1.30E+03
2.16E+03	7.14E+02	9.06E+01	2.16E+03	1.24E+03	1.39E+02	2.16E+03	8.55E+02	3.02E+02	2.16E+03	2.04E+02	1.80E+02	2.16E+03	2.71E+02	1.60E+02	2.16E+03	1.32E+03	1.30E+02	2.16E+03	8.83E+02	5.27E+01	2.16E+03	2.08E+02	4.39E+01	2.16E+03	6.19E+02	5.56E+01	2.16E+03	4.73E+02	7.83E+01	2.16E+03	7.07E+02	1.51E+02	2.16E+03	9.78E+02	2.42E+02	2.16E+03	7.52E+02	2.88E+02	2.16E+03	6.47E+02	1.80E+02	2.16E+03	1.22E+03	2.22E+02	2.16E+03	1.30E+03	1.46E+02	2.16E+03	1.30E+03
2.18E+03	7.09E+02	8.36E+01	2.18E+03	1.24E+03	1.37E+02	2.18E+03	8.56E+02	3.02E+02	2.18E+03	2.04E+02	1.82E+02	2.18E+03	2.74E+02	1.65E+02	2.18E+03	1.32E+03	1.25E+02	2.18E+03	8.85E+02	5.43E+01	2.18E+03	2.12E+02	3.93E+01	2.18E+03	6.16E+02	5.83E+01	2.18E+03	4.71E+02	8.46E+01	2.18E+03	7.09E+02	1.55E+02	2.18E+03	9.81E+02	2.42E+02	2.18E+03	7.54E+02	2.83E+02	2.18E+03	6.47E+02	1.80E+02	2.18E+03	1.22E+03	2.23E+02	2.18E+03	1.30E+03	1.46E+02	2.18E+03	1.29E+03
2.19E+03	7.10E+02	7.72E+01	2.19E+03	1.23E+03	1.37E+02	2.19E+03	8.63E+02	3.02E+02	2.19E+03	2.02E+02	1.87E+02	2.19E+03	2.73E+02	1.71E+02	2.19E+03	1.31E+03	1.24E+02	2.19E+03	8.83E+02	5.94E+01	2.19E+03	2.14E+02	3.59E+01	2.19E+03	6.12E+02	6.19E+01	2.19E+03	4.68E+02	9.02E+01	2.19E+03	7.07E+02	1.60E+02	2.19E+03	9.86E+02	2.37E+02	2.19E+03	7.53E+02	2.76E+02	2.19E+03	6.48E+02	1.80E+02	2.19E+03	1.22E+03	2.27E+02	2.19E+03	1.29E+03	1.46E+02	2.19E+03	1.28E+03
2.21E+03	7.19E+02	7.14E+01	2.21E+03	1.22E+03	1.33E+02	2.21E+03	8.67E+02	3.04E+02	2.21E+03	2.00E+02	1.95E+02	2.21E+03	2.71E+02	1.77E+02	2.21E+03	1.31E+03	1.24E+02	2.21E+03	8.82E+02	6.20E+01	2.21E+03	2.17E+02	3.15E+01	2.21E+03	6.11E+02	6.57E+01	2.21E+03	4.69E+02	9.74E+01	2.21E+03	7.07E+02	1.62E+02	2.21E+03	9.91E+02	2.32E+02	2.21E+03	7.56E+02	2.69E+02	2.21E+03	6.48E+02	1.79E+02	2.21E+03	1.22E+03	2.28E+02	2.21E+03	1.29E+03	1.44E+02	2.21E+03	1.28E+03
2.22E+03	7.23E+02	6.99E+01	2.22E+03	1.22E+03	1.30E+02	2.22E+03	8.72E+02	3.06E+02	2.22E+03	2.02E+02	2.06E+02	2.22E+03	2.70E+02	1.78E+02	2.22E+03	1.30E+03	1.22E+02	2.22E+03	8.81E+02	6.71E+01	2.22E+03	2.18E+02	2.95E+01	2.22E+03	6.11E+02	6.73E+01	2.22E+03	4.73E+02	1.00E+02	2.22E+03	7.04E+02	1.62E+02	2.22E+03	9.95E+02	2.29E+02	2.22E+03	7.60E+02	2.65E+02	2.22E+03	6.49E+02	1.76E+02	2.22E+03	1.21E+03	2.30E+02	2.22E+03	1.28E+03	1.40E+02	2.22E+03	1.27E+03
2.24E+03	7.24E+02	7.29E+01	2.24E+03	1.21E+03	1.29E+02	2.24E+03	8.78E+02	3.05E+02	2.24E+03	2.06E+02	2.13E+02	2.24E+03	2.67E+02	1.77E+02	2.24E+03	1.29E+03	1.21E+02	2.24E+03	8.78E+02	6.98E+01	2.24E+03	2.21E+02	2.88E+01	2.24E+03	6.11E+02	6.91E+01	2.24E+03	4.75E+02	1.04E+02	2.24E+03	6.99E+02	1.62E+02	2.24E+03	9.98E+02	2.25E+02	2.24E+03	7.62E+02	2.61E+02	2.24E+03	6.49E+02	1.75E+02	2.24E+03	1.21E+03	2.32E+02	2.24E+03	1.28E+03	1.39E+02	2.24E+03	1.27E+03
2.25E+03	7.25E+02	8.12E+01	2.25E+03	1.20E+03	1.30E+02	2.25E+03	8.84E+02	3.03E+02	2.25E+03	2.14E+02	2.17E+02	2.25E+03	2.60E+02	1.75E+02	2.25E+03	1.29E+03	1.20E+02	2.25E+03	8.77E+02	6.65E+01	2.25E+03	2.26E+02	3.16E+01	2.25E+03	6.09E+02	7.01E+01	2.25E+03	4.72E+02	1.06E+02	2.25E+03	6.98E+02	1.59E+02	2.25E+03	9.99E+02	2.23E+02	2.25E+03	7.65E+02	2.55E+02	2.25E+03	6.50E+02	1.75E+02	2.25E+03	1.21E+03	2.34E+02	2.25E+03	1.27E+03	1.40E+02	2.25E+03	1.26E+03
2.27E+03	7.24E+02	9.17E+01	2.27E+03	1.20E+03	1.30E+02	2.27E+03	8.91E+02	3.02E+02	2.27E+03	2.18E+02	2.21E+02	2.27E+03	2.57E+02	1.68E+02	2.27E+03	1.29E+03	1.17E+02	2.27E+03	8.76E+02	6.17E+01	2.27E+03	2.30E+02	3.49E+01	2.27E+03	6.07E+02	7.24E+01	2.27E+03	4.70E+02	1.06E+02	2.27E+03	6.99E+02	1.57E+02	2.27E+03	1.00E+03	2.21E+02	2.27E+03	7.66E+02	2.50E+02	2.27E+03	6.51E+02	1.75E+02	2.27E+03	1.21E+03	2.33E+02	2.27E+03	1.27E+03	1.41E+02	2.27E+03	1.26E+03
2.28E+03	7.24E+02	9.79E+01	2.28E+03	1.19E+03	1.30E+02	2.28E+03	8.96E+02	3.01E+02	2.28E+03	2.22E+02	2.22E+02	2.28E+03	2.59E+02	1.64E+02	2.28E+03	1.28E+03	1.10E+02	2.28E+03	8.76E+02	5.59E+01	2.28E+03	2.36E+02	4.34E+01	2.28E+03	6.08E+02	7.60E+01	2.28E+03	4.67E+02	1.05E+02	2.28E+03	6.98E+02	1.57E+02	2.28E+03	1.01E+03	2.19E+02	2.28E+03	7.64E+02	2.47E+02	2.28E+03	6.54E+02	1.74E+02	2.28E+03	1.21E+03	2.36E+02	2.28E+03	1.26E+03	1.41E+02	2.28E+03	1.25E+03
2.30E+03	7.21E+02	1.02E+02	2.30E+03	1.19E+03	1.29E+02	2.30E+03	8.95E+02	3.01E+02	2.30E+03	2.33E+02	2.23E+02	2.30E+03	2.59E+02	1.62E+02	2.30E+03	1.28E+03	1.08E+02	2.30E+03	8.79E+02	5.08E+01	2.30E+03	2.39E+02	5.21E+01	2.30E+03	6.09E+02	8.12E+01	2.30E+03	4.61E+02	1.06E+02	2.30E+03	6.93E+02	1.54E+02	2.30E+03	1.01E+03	2.14E+02	2.30E+03	7.62E+02	2.43E+02	2.30E+03	6.55E+02	1.73E+02	2.30E+03	1.21E+03	2.36E+02	2.30E+03	1.25E+03	1.40E+02	2.30E+03	1.25E+03
2.31E+03	7.21E+02	1.04E+02	2.31E+03	1.18E+03	1.30E+02	2.31E+03	8.95E+02	3.02E+02	2.31E+03	2.44E+02	2.21E+02	2.31E+03	2.59E+02	1.62E+02	2.31E+03	1.27E+03	1.05E+02	2.31E+03	8.81E+02	4.81E+01	2.31E+03	2.37E+02	5.87E+01	2.31E+03	6.15E+02	8.32E+01	2.31E+03	4.54E+02	1.13E+02	2.31E+03	6.88E+02	1.54E+02	2.31E+03	1.02E+03	2.14E+02	2.31E+03	7.59E+02	2.42E+02	2.31E+03	6.55E+02	1.71E+02	2.31E+03	1.20E+03	2.37E+02	2.31E+03	1.25E+03	1.39E+02	2.31E+03	1.24E+03
2.33E+03	7.20E+02	1.07E+02	2.33E+03	1.17E+03	1.31E+02	2.33E+03	8.97E+02	2.99E+02	2.33E+03	2.52E+02	2.23E+02	2.33E+03	2.61E+02	1.62E+02	2.33E+03	1.27E+03	1.06E+02	2.33E+03	8.83E+02	4.37E+01	2.33E+03	2.31E+02	6.44E+01	2.33E+03	6.18E+02	8.49E+01	2.33E+03	4.51E+02	1.19E+02	2.33E+03	6.84E+02	1.53E+02	2.33E+03	1.02E+03	2.15E+02	2.33E+03	7.54E+02	2.41E+02	2.33E+03	6.53E+02	1.70E+02	2.33E+03	1.19E+03	2.38E+02	2.33E+03	1.25E+03	1.35E+02	2.33E+03	1.23E+03
2.34E+03	7.14E+02	1.13E+02	2.34E+03	1.17E+03	1.32E+02	2.34E+03	8.97E+02	2.91E+02	2.34E+03	2.57E+02	2.21E+02	2.34E+03	2.60E+02	1.62E+02	2.34E+03	1.26E+03	1.07E+02	2.34E+03	8.87E+02	4.21E+01	2.34E+03	2.27E+02	6.79E+01	2.34E+03	6.20E+02	8.51E+01	2.34E+03	4.55E+02	1.22E+02	2.34E+03	6.83E+02	1.49E+02	2.34E+03	1.03E+03	2.19E+02	2.34E+03	7.50E+02	2.42E+02	2.34E+03	6.52E+02	1.70E+02	2.34E+03	1.19E+03	2.38E+02	2.34E+03	1.24E+03	1.34E+02	2.34E+03	1.22E+03
2.36E+03	7.11E+02	1.16E+02	2.36E+03	1.16E+03	1.31E+02	2.36E+03	8.94E+02	2.84E+02	2.36E+03	2.59E+02	2.16E+02	2.36E+03	2.56E+02	1.62E+02	2.36E+03	1.25E+03	1.05E+02	2.36E+03	8.91E+02	4.44E+01	2.36E+03	2.28E+02	7.53E+01	2.36E+03	6.21E+02	8.57E+01	2.36E+03	4.59E+02	1.23E+02	2.36E+03	6.83E+02	1.44E+02	2.36E+03	1.03E+03	2.18E+02	2.36E+03	7.47E+02	2.40E+02	2.36E+03	6.52E+02	1.70E+02	2.36E+03	1.19E+03	2.40E+02	2.36E+03	1.23E+03	1.34E+02	2.36E+03	1.22E+03
2.37E+03	7.08E+02	1.18E+02	2.37E+03	1.15E+03	1.33E+02	2.37E+03	8.95E+02	2.75E+02	2.37E+03	2.58E+02	2.10E+02	2.37E+03	2.51E+02	1.62E+02	2.37E+03	1.25E+03	1.03E+02	2.37E+03	8.94E+02	4.40E+01	2.37E+03	2.27E+02	7.77E+01	2.37E+03	6.22E+02	8.72E+01	2.37E+03	4.62E+02	1.26E+02	2.37E+03	6.83E+02	1.39E+02	2.37E+03	1.04E+03	2.14E+02	2.37E+03	7.45E+02	2.36E+02	2.37E+03	6.52E+02	1.70E+02	2.37E+03	1.19E+03	2.41E+02	2.37E+03	1.23E+03	1.36E+02	2.37E+03	1.21E+03
2.39E+03	7.04E+02	1.20E+02	2.39E+03	1.15E+03	1.35E+02	2.39E+03	8.93E+02	2.69E+02	2.39E+03	2.55E+02	2.06E+02	2.39E+03	2.46E+02	1.58E+02	2.39E+03	1.24E+03	9.97E+01	2.39E+03	8.98E+02	3.98E+01	2.39E+03	2.25E+02	8.39E+01	2.39E+03	6.24E+02	9.04E+01	2.39E+03	4.64E+02	1.26E+02	2.39E+03	6.83E+02	1.37E+02	2.39E+03	1.04E+03	2.10E+02	2.39E+03	7.46E+02	2.36E+02	2.39E+03	6.52E+02	1.70E+02	2.39E+03	1.19E+03	2.42E+02	2.39E+03	1.22E+03	1.36E+02	2.39E+03	1.21E+03
2.40E+03	6.99E+02	1.23E+02	2.40E+03	1.14E+03	1.42E+02	2.40E+03	8.92E+02	2.63E+02	2.40E+03	2.57E+02	2.03E+02	2.40E+03	2.44E+02	1.54E+02	2.40E+03	1.24E+03	9.77E+01	2.40E+03	9.02E+02	3.62E+01	2.40E+03	2.24E+02	8.65E+01	2.40E+03	6.27E+02	9.12E+01	2.40E+03	4.67E+02	1.28E+02	2.40E+03	6.82E+02	1.32E+02	2.40E+03	1.05E+03	2.10E+02	2.40E+03	7.46E+02	2.38E+02	2.40E+03	6.52E+02	1.72E+02	2.40E+03	1.18E+03	2.43E+02	2.40E+03	1.22E+03	1.35E+02	2.40E+03	1.20E+03
2.42E+03	6.97E+02	1.24E+02	2.42E+03	1.14E+03	1.46E+02	2.42E+03	8.93E+02	2.57E+02	2.42E+03	2.57E+02	2.02E+02	2.42E+03	2.39E+02	1.51E+02	2.42E+03	1.23E+03	9.67E+01	2.42E+03	9.05E+02	3.50E+01	2.42E+03	2.23E+02	8.67E+01	2.42E+03	6.27E+02	9.08E+01	2.42E+03	4.67E+02	1.34E+02	2.42E+03	6.78E+02	1.30E+02	2.42E+03	1.05E+03	2.09E+02	2.42E+03	7.47E+02	2.41E+02	2.42E+03	6.52E+02	1.72E+02	2.42E+03	1.18E+03	2.47E+02	2.42E+03	1.21E+03	1.33E+02	2.42E+03	1.20E+03
2.43E+03	6.96E+02	1.23E+02	2.43E+03	1.13E+03	1.49E+02	2.43E+03	8.97E+02	2.50E+02	2.43E+03	2.55E+02	1.97E+02	2.43E+03	2.36E+02	1.45E+02	2.43E+03	1.23E+03	9.79E+01	2.43E+03	9.11E+02	3.79E+01	2.43E+03	2.19E+02	8.95E+01	2.43E+03	6.32E+02	8.94E+01	2.43E+03	4.63E+02	1.41E+02	2.43E+03	6.76E+02	1.29E+02	2.43E+03	1.05E+03	2.09E+02	2.43E+03	7.47E+02	2.42E+02	2.43E+03	6.52E+02	1.72E+02	2.43E+03	1.18E+03	2.50E+02	2.43E+03	1.21E+03	1.31E+02	2.43E+03	1.19E+03
2.45E+03	6.91E+02	1.22E+02	2.45E+03	1.13E+03	1.51E+02	2.45E+03	9.02E+02	2.44E+02	2.45E+03	2.52E+02	1.88E+02	2.45E+03	2.33E+02	1.41E+02	2.45E+03	1.22E+03	9.89E+01	2.45E+03	9.17E+02	4.15E+01	2.45E+03	2.13E+02	9.05E+01	2.45E+03	6.35E+02	8.92E+01	2.45E+03	4.58E+02	1.46E+02	2.45E+03	6.73E+02	1.29E+02	2.45E+03	1.05E+03	2.09E+02	2.45E+03	7.49E+02	2.42E+02	2.45E+03	6.52E+02	1.72E+02	2.45E+03	1.18E+03	2.49E+02	2.45E+03	1.20E+03	1.30E+02	2.45E+03	1.18E+03
2.46E+03	6.85E+02	1.20E+02	2.46E+03	1.12E+03	1.51E+02	2.46E+03	9.05E+02	2.39E+02	2.46E+03	2.51E+02	1.78E+02	2.46E+03	2.32E+02	1.35E+02	2.46E+03	1.22E+03	9.72E+01	2.46E+03	9.21E+02	4.50E+01	2.46E+03	2.11E+02	9.03E+01	2.46E+03	6.36E+02	9.05E+01	2.46E+03	4.55E+02	1.51E+02	2.46E+03	6.70E+02	1.32E+02	2.46E+03	1.05E+03	2.11E+02	2.46E+03	7.54E+02	2.42E+02	2.46E+03	6.51E+02	1.71E+02	2.46E+03	1.17E+03	2.52E+02	2.46E+03	1.19E+03	1.33E+02	2.46E+03	1.18E+03
2.48E+03	6.81E+02	1.21E+02	2.48E+03	1.12E+03	1.47E+02	2.48E+03	9.03E+02	2.34E+02	2.48E+03	2.49E+02	1.73E+02	2.48E+03	2.33E+02	1.31E+02	2.48E+03	1.21E+03	9.92E+01	2.48E+03	9.29E+02	4.30E+01	2.48E+03	2.10E+02	8.24E+01	2.48E+03	6.35E+02	9.24E+01	2.48E+03	4.51E+02	1.54E+02	2.48E+03	6.68E+02	1.36E+02	2.48E+03	1.05E+03	2.11E+02	2.48E+03	7.59E+02	2.41E+02	2.48E+03	6.51E+02	1.71E+02	2.48E+03	1.17E+03	2.56E+02	2.48E+03	1.18E+03	1.32E+02	2.48E+03	1.17E+03
2.49E+03	6.75E+02	1.26E+02	2.49E+03	1.11E+03	1.45E+02	2.49E+03	8.99E+02	2.28E+02	2.49E+03	2.47E+02	1.68E+02	2.49E+03	2.34E+02	1.27E+02	2.49E+03	1.20E+03	1.00E+02	2.49E+03	9.30E+02	4.39E+01	2.49E+03	2.10E+02	7.74E+01	2.49E+03	6.35E+02	9.30E+01	2.49E+03	4.52E+02	1.56E+02	2.49E+03	6.60E+02	1.37E+02	2.49E+03	1.05E+03	2.10E+02	2.49E+03	7.64E+02	2.39E+02	2.49E+03	6.50E+02	1.70E+02	2.49E+03	1.16E+03	2.57E+02	2.49E+03	1.18E+03	1.30E+02	2.49E+03	1.17E+03
2.51E+03	6.69E+02	1.28E+02	2.51E+03	1.10E+03	1.47E+02	2.51E+03	8.97E+02	2.21E+02	2.51E+03	2.44E+02	1.61E+02	2.51E+03	2.33E+02	1.22E+02	2.51E+03	1.20E+03	1.08E+02	2.51E+03	9.35E+02	4.83E+01	2.51E+03	2.15E+02	7.43E+01	2.51E+03	6.36E+02	9.58E+01	2.51E+03	4.54E+02	1.61E+02	2.51E+03	6.55E+02	1.33E+02	2.51E+03	1.06E+03	2.07E+02	2.51E+03	7.66E+02	2.34E+02	2.51E+03	6.50E+02	1.69E+02	2.51E+03	1.16E+03	2.58E+02	2.51E+03	1.17E+03	1.26E+02	2.51E+03	1.16E+03
2.52E+03	6.68E+02	1.28E+02	2.52E+03	1.10E+03	1.46E+02	2.52E+03	8.94E+02	2.17E+02	2.52E+03	2.43E+02	1.55E+02	2.52E+03	2.29E+02	1.18E+02	2.52E+03	1.20E+03	1.12E+02	2.52E+03	9.37E+02	5.73E+01	2.52E+03	2.20E+02	7.56E+01	2.52E+03	6.34E+02	9.93E+01	2.52E+03	4.57E+02	1.63E+02	2.52E+03	6.56E+02	1.27E+02	2.52E+03	1.06E+03	2.07E+02	2.52E+03	7.70E+02	2.32E+02	2.52E+03	6.49E+02	1.69E+02	2.52E+03	1.15E+03	2.60E+02	2.52E+03	1.17E+03	1.28E+02	2.52E+03	1.16E+03
2.54E+03	6.63E+02	1.33E+02	2.54E+03	1.10E+03	1.47E+02	2.54E+03	8.92E+02	2.12E+02	2.54E+03	2.45E+02	1.50E+02	2.54E+03	2.22E+02	1.13E+02	2.54E+03	1.20E+03	1.15E+02	2.54E+03	9.34E+02	6.51E+01	2.54E+03	2.23E+02	7.51E+01	2.54E+03	6.27E+02	1.00E+02	2.54E+03	4.59E+02	1.64E+02	2.54E+03	6.58E+02	1.20E+02	2.54E+03	1.06E+03	2.02E+02	2.54E+03	7.73E+02	2.26E+02	2.54E+03	6.48E+02	1.69E+02	2.54E+03	1.15E+03	2.62E+02	2.54E+03	1.16E+03	1.30E+02	2.54E+03	1.15E+03
2.55E+03	6.58E+02	1.38E+02	2.55E+03	1.09E+03	1.47E+02	2.55E+03	8.95E+02	2.09E+02	2.55E+03	2.48E+02	1.46E+02	2.55E+03	2.18E+02	1.09E+02	2.55E+03	1.20E+03	1.15E+02	2.55E+03	9.31E+02	7.48E+01	2.55E+03	2.26E+02	7.58E+01	2.55E+03	6.24E+02	9.67E+01	2.55E+03	4.57E+02	1.64E+02	2.55E+03	6.57E+02	1.16E+02	2.55E+03	1.05E+03	1.97E+02	2.55E+03	7.70E+02	2.21E+02	2.55E+03	6.48E+02	1.69E+02	2.55E+03	1.14E+03	2.63E+02	2.55E+03	1.16E+03	1.34E+02	2.55E+03	1.15E+03
2.57E+03	6.56E+02	1.43E+02	2.57E+03	1.08E+03	1.50E+02	2.57E+03	8.98E+02	2.06E+02	2.57E+03	2.49E+02	1.44E+02	2.57E+03	2.13E+02	1.05E+02	2.57E+03	1.19E+03	1.15E+02	2.57E+03	9.31E+02	7.93E+01	2.57E+03	2.28E+02	7.64E+01	2.57E+03	6.18E+02	9.50E+01	2.57E+03	4.57E+02	1.63E+02	2.57E+03	6.57E+02	1.10E+02	2.57E+03	1.04E+03	1.96E+02	2.57E+03	7.62E+02	2.16E+02	2.57E+03	6.48E+02	1.69E+02	2.57E+03	1.14E+03	2.63E+02	2.57E+03	1.15E+03	1.37E+02	2.57E+03	1.14E+03
2.58E+03	6.53E+02	1.50E+02	2.58E+03	1.08E+03	1.51E+02	2.58E+03	9.03E+02	1.99E+02	2.58E+03	2.48E+02	1.46E+02	2.58E+03	2.10E+02	9.94E+01	2.58E+03	1.19E+03	1.13E+02	2.58E+03	9.38E+02	8.38E+01	2.58E+03	2.28E+02	7.40E+01	2.58E+03	6.14E+02	9.62E+01	2.58E+03	4.56E+02	1.61E+02	2.58E+03	6.58E+02	1.06E+02	2.58E+03	1.03E+03	1.94E+02	2.58E+03	7.54E+02	2.16E+02	2.58E+03	6.47E+02	1.69E+02	2.58E+03	1.14E+03	2.62E+02	2.58E+03	1.15E+03	1.45E+02	2.58E+03	1.14E+03
2.60E+03	6.51E+02	1.54E+02	2.60E+03	1.07E+03	1.50E+02	2.60E+03	9.07E+02	1.92E+02	2.60E+03	2.48E+02	1.47E+02	2.60E+03	2.12E+02	9.48E+01	2.60E+03	1.18E+03	1.12E+02	2.60E+03	9.46E+02	8.46E+01	2.60E+03	2.29E+02	7.20E+01	2.60E+03	6.12E+02	9.64E+01	2.60E+03	4.51E+02	1.59E+02	2.60E+03	6.66E+02	1.03E+02	2.60E+03	1.03E+03	1.96E+02	2.60E+03	7.48E+02	2.13E+02	2.60E+03	6.44E+02	1.70E+02	2.60E+03	1.14E+03	2.61E+02	2.60E+03	1.14E+03	1.45E+02	2.60E+03	1.13E+03
2.61E+03	6.50E+02	1.58E+02	2.61E+03	1.06E+03	1.52E+02	2.61E+03	9.12E+02	1.88E+02	2.61E+03	2.54E+02	1.54E+02	2.61E+03	2.16E+02	8.95E+01	2.61E+03	1.18E+03	1.13E+02	2.61E+03	9.50E+02	8.85E+01	2.61E+03	2.35E+02	7.34E+01	2.61E+03	6.09E+02	9.54E+01	2.61E+03	4.47E+02	1.57E+02	2.61E+03	6.73E+02	1.05E+02	2.61E+03	1.02E+03	1.99E+02	2.61E+03	7.45E+02	2.09E+02	2.61E+03	6.41E+02	1.70E+02	2.61E+03	1.13E+03	2.62E+02	2.61E+03	1.13E+03	1.47E+02	2.61E+03	1.13E+03
2.63E+03	6.49E+02	1.62E+02	2.63E+03	1.06E+03	1.53E+02	2.63E+03	9.17E+02	1.86E+02	2.63E+03	2.55E+02	1.56E+02	2.63E+03	2.18E+02	8.03E+01	2.63E+03	1.17E+03	1.15E+02	2.63E+03	9.52E+02	8.73E+01	2.63E+03	2.42E+02	7.68E+01	2.63E+03	6.05E+02	9.47E+01	2.63E+03	4.40E+02	1.54E+02	2.63E+03	6.78E+02	1.06E+02	2.63E+03	1.02E+03	1.99E+02	2.63E+03	7.43E+02	2.03E+02	2.63E+03	6.44E+02	1.62E+02	2.63E+03	1.13E+03	2.64E+02	2.63E+03	1.13E+03	1.49E+02	2.63E+03	1.12E+03
2.64E+03	6.48E+02	1.67E+02	2.64E+03	1.06E+03	1.54E+02	2.64E+03	9.21E+02	1.91E+02	2.64E+03	2.59E+02	1.59E+02	2.64E+03	2.19E+02	7.82E+01	2.64E+03	1.17E+03	1.18E+02	2.64E+03	9.52E+02	8.66E+01	2.64E+03	2.46E+02	7.55E+01	2.64E+03	6.01E+02	9.51E+01	2.64E+03	4.36E+02	1.50E+02	2.64E+03	6.83E+02	9.81E+01	2.64E+03	1.02E+03	2.01E+02	2.64E+03	7.40E+02	2.00E+02	2.64E+03	6.45E+02	1.61E+02	2.64E+03	1.13E+03	2.66E+02	2.64E+03	1.13E+03	1.52E+02	2.64E+03	1.12E+03
2.66E+03	6.50E+02	1.71E+02	2.66E+03	1.05E+03	1.56E+02	2.66E+03	9.21E+02	1.93E+02	2.66E+03	2.65E+02	1.65E+02	2.66E+03	2.22E+02	7.63E+01	2.66E+03	1.16E+03	1.21E+02	2.66E+03	9.49E+02	8.51E+01	2.66E+03	2.55E+02	7.54E+01	2.66E+03	5.97E+02	9.30E+01	2.66E+03	4.30E+02	1.47E+02	2.66E+03	6.85E+02	8.89E+01	2.66E+03	1.02E+03	1.99E+02	2.66E+03	7.33E+02	1.99E+02	2.66E+03	6.45E+02	1.60E+02	2.66E+03	1.12E+03	2.65E+02	2.66E+03	1.12E+03	1.53E+02	2.66E+03	1.12E+03
2.67E+03	6.52E+02	1.76E+02	2.67E+03	1.05E+03	1.57E+02	2.67E+03	9.23E+02	1.98E+02	2.67E+03	2.77E+02	1.61E+02	2.67E+03	2.28E+02	7.49E+01	2.67E+03	1.15E+03	1.23E+02	2.67E+03	9.46E+02	8.52E+01	2.67E+03	2.59E+02	8.05E+01	2.67E+03	5.94E+02	9.22E+01	2.67E+03	4.26E+02	1.43E+02	2.67E+03	6.86E+02	8.48E+01	2.67E+03	1.01E+03	1.97E+02	2.67E+03	7.29E+02	2.00E+02	2.67E+03	6.44E+02	1.61E+02	2.67E+03	1.12E+03	2.64E+02	2.67E+03	1.11E+03	1.53E+02	2.67E+03	1.12E+03
2.69E+03	6.58E+02	1.83E+02	2.69E+03	1.04E+03	1.58E+02	2.69E+03	9.22E+02	2.02E+02	2.69E+03	2.80E+02	1.52E+02	2.69E+03	2.35E+02	7.85E+01	2.69E+03	1.15E+03	1.24E+02	2.69E+03	9.39E+02	8.58E+01	2.69E+03	2.59E+02	8.66E+01	2.69E+03	5.93E+02	9.03E+01	2.69E+03	4.25E+02	1.38E+02	2.69E+03	6.87E+02	8.13E+01	2.69E+03	1.01E+03	1.98E+02	2.69E+03	7.25E+02	1.99E+02	2.69E+03	6.44E+02	1.64E+02	2.69E+03	1.12E+03	2.64E+02	2.69E+03	1.10E+03	1.54E+02	2.69E+03	1.12E+03
2.70E+03	6.63E+02	1.85E+02	2.70E+03	1.03E+03	1.59E+02	2.70E+03	9.22E+02	2.01E+02	2.70E+03	2.79E+02	1.48E+02	2.70E+03	2.41E+02	7.90E+01	2.70E+03	1.14E+03	1.27E+02	2.70E+03	9.34E+02	8.80E+01	2.70E+03	2.61E+02	9.07E+01	2.70E+03	5.90E+02	8.83E+01	2.70E+03	4.24E+02	1.34E+02	2.70E+03	6.88E+02	7.97E+01	2.70E+03	1.01E+03	1.99E+02	2.70E+03	7.23E+02	1.92E+02	2.70E+03	6.45E+02	1.66E+02	2.70E+03	1.12E+03	2.65E+02	2.70E+03	1.09E+03	1.52E+02	2.70E+03	1.11E+03
2.72E+03	6.69E+02	1.82E+02	2.72E+03	1.02E+03	1.60E+02	2.72E+03	9.16E+02	2.04E+02	2.72E+03	2.78E+02	1.48E+02	2.72E+03	2.46E+02	7.82E+01	2.72E+03	1.14E+03	1.31E+02	2.72E+03	9.29E+02	9.05E+01	2.72E+03	2.65E+02	9.18E+01	2.72E+03	5.86E+02	8.74E+01	2.72E+03	4.17E+02	1.28E+02	2.72E+03	6.92E+02	7.45E+01	2.72E+03	1.01E+03	2.01E+02	2.72E+03	7.23E+02	1.88E+02	2.72E+03	6.46E+02	1.66E+02	2.72E+03	1.12E+03	2.65E+02	2.72E+03	1.08E+03	1.52E+02	2.72E+03	1.11E+03
2.73E+03	6.75E+02	1.78E+02	2.73E+03	1.02E+03	1.60E+02	2.73E+03	9.07E+02	2.07E+02	2.73E+03	2.75E+02	1.48E+02	2.73E+03	2.50E+02	7.94E+01	2.73E+03	1.13E+03	1.34E+02	2.73E+03	9.26E+02	9.30E+01	2.73E+03	2.67E+02	9.00E+01	2.73E+03	5.80E+02	8.64E+01	2.73E+03	4.11E+02	1.28E+02	2.73E+03	6.95E+02	6.88E+01	2.73E+03	1.01E+03	2.00E+02	2.73E+03	7.22E+02	1.91E+02	2.73E+03	6.46E+02	1.66E+02	2.73E+03	1.12E+03	2.64E+02	2.73E+03	1.08E+03	1.54E+02	2.73E+03	1.10E+03
2.75E+03	6.79E+02	1.78E+02	2.75E+03	1.01E+03	1.61E+02	2.75E+03	9.01E+02	2.09E+02	2.75E+03	2.69E+02	1.48E+02	2.75E+03	2.54E+02	8.01E+01	2.75E+03	1.13E+03	1.38E+02	2.75E+03	9.23E+02	9.38E+01	2.75E+03	2.70E+02	8.94E+01	2.75E+03	5.78E+02	8.59E+01	2.75E+03	4.09E+02	1.29E+02	2.75E+03	6.95E+02	6.53E+01	2.75E+03	1.00E+03	1.99E+02	2.75E+03	7.22E+02	1.91E+02	2.75E+03	6.46E+02	1.66E+02	2.75E+03	1.12E+03	2.63E+02	2.75E+03	1.07E+03	1.56E+02	2.75E+03	1.10E+03
2.76E+03	6.84E+02	1.72E+02	2.76E+03	1.00E+03	1.62E+02	2.76E+03	8.93E+02	2.02E+02	2.76E+03	2.62E+02	1.47E+02	2.76E+03	2.57E+02	7.95E+01	2.76E+03	1.12E+03	1.41E+02	2.76E+03	9.16E+02	8.90E+01	2.76E+03	2.76E+02	8.94E+01	2.76E+03	5.75E+02	8.70E+01	2.76E+03	4.09E+02	1.36E+02	2.76E+03	6.95E+02	6.42E+01	2.76E+03	9.98E+02	2.02E+02	2.76E+03	7.22E+02	1.90E+02	2.76E+03	6.42E+02	1.65E+02	2.76E+03	1.12E+03	2.61E+02	2.76E+03	1.07E+03	1.54E+02	2.76E+03	1.09E+03
2.78E+03	6.89E+02	1.69E+02	2.78E+03	9.96E+02	1.66E+02	2.78E+03	8.90E+02	2.01E+02	2.78E+03	2.60E+02	1.43E+02	2.78E+03	2.62E+02	7.55E+01	2.78E+03	1.12E+03	1.44E+02	2.78E+03	9.08E+02	8.47E+01	2.78E+03	2.82E+02	8.92E+01	2.78E+03	5.73E+02	8.94E+01	2.78E+03	4.09E+02	1.39E+02	2.78E+03	6.91E+02	6.33E+01	2.78E+03	9.95E+02	2.04E+02	2.78E+03	7.21E+02	1.92E+02	2.78E+03	6.40E+02	1.67E+02	2.78E+03	1.12E+03	2.54E+02	2.78E+03	1.06E+03	1.56E+02	2.78E+03	1.09E+03
2.79E+03	6.93E+02	1.69E+02	2.79E+03	9.91E+02	1.65E+02	2.79E+03	8.84E+02	2.03E+02	2.79E+03	2.64E+02	1.36E+02	2.79E+03	2.67E+02	7.25E+01	2.79E+03	1.12E+03	1.48E+02	2.79E+03	9.04E+02	8.58E+01	2.79E+03	2.87E+02	9.02E+01	2.79E+03	5.72E+02	9.10E+01	2.79E+03	4.07E+02	1.40E+02	2.79E+03	6.83E+02	6.24E+01	2.79E+03	9.92E+02	2.08E+02	2.79E+03	7.21E+02	1.93E+02	2.79E+03	6.40E+02	1.67E+02	2.79E+03	1.13E+03	2.53E+02	2.79E+03	1.05E+03	1.52E+02	2.79E+03	1.08E+03
2.81E+03	6.98E+02	1.73E+02	2.81E+03	9.83E+02	1.57E+02	2.81E+03	8.80E+02	2.04E+02	2.81E+03	2.67E+02	1.29E+02	2.81E+03	2.73E+02	7.02E+01	2.81E+03	1.11E+03	1.47E+02	2.81E+03	8.93E+02	8.78E+01	2.81E+03	2.90E+02	9.27E+01	2.81E+03	5.71E+02	9.35E+01	2.81E+03	4.09E+02	1.45E+02	2.81E+03	6.77E+02	6.94E+01	2.81E+03	9.87E+02	2.12E+02	2.81E+03	7.21E+02	1.92E+02	2.81E+03	6.40E+02	1.67E+02	2.81E+03	1.13E+03	2.52E+02	2.81E+03	1.05E+03	1.51E+02	2.81E+03	1.08E+03
2.82E+03	7.02E+02	1.74E+02	2.82E+03	9.74E+02	1.57E+02	2.82E+03	8.74E+02	2.03E+02	2.82E+03	2.70E+02	1.29E+02	2.82E+03	2.78E+02	6.94E+01	2.82E+03	1.11E+03	1.49E+02	2.82E+03	8.83E+02	8.44E+01	2.82E+03	2.91E+02	9.85E+01	2.82E+03	5.71E+02	9.57E+01	2.82E+03	4.10E+02	1.51E+02	2.82E+03	6.75E+02	7.41E+01	2.82E+03	9.81E+02	2.16E+02	2.82E+03	7.21E+02	1.91E+02	2.82E+03	6.40E+02	1.67E+02	2.82E+03	1.13E+03	2.56E+02	2.82E+03	1.04E+03	1.51E+02	2.82E+03	1.07E+03
2.84E+03	7.06E+02	1.74E+02	2.84E+03	9.67E+02	1.58E+02	2.84E+03	8.71E+02	2.00E+02	2.84E+03	2.74E+02	1.30E+02	2.84E+03	2.86E+02	6.79E+01	2.84E+03	1.10E+03	1.50E+02	2.84E+03	8.76E+02	8.52E+01	2.84E+03	2.91E+02	1.02E+02	2.84E+03	5.74E+02	9.82E+01	2.84E+03	4.12E+02	1.55E+02	2.84E+03	6.71E+02	8.02E+01	2.84E+03	9.74E+02	2.19E+02	2.84E+03	7.21E+02	1.89E+02	2.84E+03	6.40E+02	1.67E+02	2.84E+03	1.13E+03	2.56E+02	2.84E+03	1.03E+03	1.48E+02	2.84E+03	1.07E+03
2.85E+03	7.07E+02	1.73E+02	2.85E+03	9.60E+02	1.59E+02	2.85E+03	8.68E+02	1.97E+02	2.85E+03	2.86E+02	1.34E+02	2.85E+03	2.90E+02	6.54E+01	2.85E+03	1.09E+03	1.49E+02	2.85E+03	8.65E+02	8.58E+01	2.85E+03	2.88E+02	1.09E+02	2.85E+03	5.76E+02	1.00E+02	2.85E+03	4.09E+02	1.56E+02	2.85E+03	6.69E+02	8.63E+01	2.85E+03	9.69E+02	2.24E+02	2.85E+03	7.18E+02	1.87E+02	2.85E+03	6.40E+02	1.66E+02	2.85E+03	1.13E+03	2.55E+02	2.85E+03	1.03E+03	1.48E+02	2.85E+03	1.06E+03
2.87E+03	7.08E+02	1.74E+02	2.87E+03	9.55E+02	1.64E+02	2.87E+03	8.64E+02	1.94E+02	2.87E+03	2.92E+02	1.32E+02	2.87E+03	2.96E+02	6.16E+01	2.87E+03	1.09E+03	1.52E+02	2.87E+03	8.59E+02	8.67E+01	2.87E+03	2.82E+02	1.11E+02	2.87E+03	5.78E+02	1.02E+02	2.87E+03	4.07E+02	1.58E+02	2.87E+03	6.69E+02	9.05E+01	2.87E+03	9.65E+02	2.26E+02	2.87E+03	7.17E+02	1.86E+02	2.87E+03	6.40E+02	1.66E+02	2.87E+03	1.13E+03	2.52E+02	2.87E+03	1.02E+03	1.50E+02	2.87E+03	1.06E+03
2.88E+03	7.06E+02	1.74E+02	2.88E+03	9.49E+02	1.65E+02	2.88E+03	8.62E+02	1.93E+02	2.88E+03	2.96E+02	1.29E+02	2.88E+03	3.00E+02	6.05E+01	2.88E+03	1.08E+03	1.55E+02	2.88E+03	8.51E+02	8.91E+01	2.88E+03	2.77E+02	1.08E+02	2.88E+03	5.78E+02	1.06E+02	2.88E+03	4.00E+02	1.60E+02	2.88E+03	6.64E+02	9.56E+01	2.88E+03	9.57E+02	2.27E+02	2.88E+03	7.17E+02	1.86E+02	2.88E+03	6.39E+02	1.66E+02	2.88E+03	1.13E+03	2.51E+02	2.88E+03	1.02E+03	1.53E+02	2.88E+03	1.06E+03
2.90E+03	7.06E+02	1.74E+02	2.90E+03	9.40E+02	1.64E+02	2.90E+03	8.60E+02	1.95E+02	2.90E+03	2.98E+02	1.25E+02	2.90E+03	3.03E+02	5.96E+01	2.90E+03	1.08E+03	1.58E+02	2.90E+03	8.48E+02	9.30E+01	2.90E+03	2.73E+02	1.04E+02	2.90E+03	5.77E+02	1.10E+02	2.90E+03	4.01E+02	1.65E+02	2.90E+03	6.60E+02	9.82E+01	2.90E+03	9.51E+02	2.29E+02	2.90E+03	7.17E+02	1.86E+02	2.90E+03	6.37E+02	1.64E+02	2.90E+03	1.13E+03	2.50E+02	2.90E+03	1.02E+03	1.55E+02	2.90E+03	1.05E+03
2.91E+03	7.06E+02	1.74E+02	2.91E+03	9.35E+02	1.62E+02	2.91E+03	8.56E+02	1.95E+02	2.91E+03	3.01E+02	1.19E+02	2.91E+03	3.04E+02	5.74E+01	2.91E+03	1.07E+03	1.59E+02	2.91E+03	8.47E+02	1.00E+02	2.91E+03	2.71E+02	9.82E+01	2.91E+03	5.75E+02	1.09E+02	2.91E+03	4.07E+02	1.71E+02	2.91E+03	6.57E+02	1.02E+02	2.91E+03	9.48E+02	2.31E+02	2.91E+03	7.17E+02	1.85E+02	2.91E+03	6.36E+02	1.61E+02	2.91E+03	1.13E+03	2.51E+02	2.91E+03	1.01E+03	1.55E+02	2.91E+03	1.05E+03
2.93E+03	7.05E+02	1.73E+02	2.93E+03	9.29E+02	1.57E+02	2.93E+03	8.52E+02	1.95E+02	2.93E+03	3.02E+02	1.13E+02	2.93E+03	3.06E+02	5.44E+01	2.93E+03	1.06E+03	1.61E+02	2.93E+03	8.40E+02	1.06E+02	2.93E+03	2.68E+02	9.38E+01	2.93E+03	5.74E+02	1.07E+02	2.93E+03	4.13E+02	1.74E+02	2.93E+03	6.56E+02	1.03E+02	2.93E+03	9.40E+02	2.32E+02	2.93E+03	7.16E+02	1.85E+02	2.93E+03	6.36E+02	1.60E+02	2.93E+03	1.12E+03	2.50E+02	2.93E+03	1.00E+03	1.56E+02	2.93E+03	1.04E+03
2.94E+03	7.04E+02	1.72E+02	2.94E+03	9.23E+02	1.53E+02	2.94E+03	8.44E+02	1.98E+02	2.94E+03	3.04E+02	1.05E+02	2.94E+03	3.06E+02	4.96E+01	2.94E+03	1.06E+03	1.61E+02	2.94E+03	8.33E+02	1.06E+02	2.94E+03	2.67E+02	8.97E+01	2.94E+03	5.74E+02	1.02E+02	2.94E+03	4.22E+02	1.77E+02	2.94E+03	6.55E+02	1.04E+02	2.94E+03	9.34E+02	2.31E+02	2.94E+03	7.16E+02	1.85E+02	2.94E+03	6.36E+02	1.60E+02	2.94E+03	1.12E+03	2.49E+02	2.94E+03	9.98E+02	1.57E+02	2.94E+03	1.04E+03
2.96E+03	6.97E+02	1.75E+02	2.96E+03	9.17E+02	1.47E+02	2.96E+03	8.34E+02	1.99E+02	2.96E+03	3.06E+02	9.98E+01	2.96E+03	3.05E+02	4.34E+01	2.96E+03	1.05E+03	1.64E+02	2.96E+03	8.29E+02	1.01E+02	2.96E+03	2.66E+02	8.73E+01	2.96E+03	5.76E+02	9.74E+01	2.96E+03	4.26E+02	1.77E+02	2.96E+03	6.55E+02	1.06E+02	2.96E+03	9.28E+02	2.32E+02	2.96E+03	7.16E+02	1.84E+02	2.96E+03	6.35E+02	1.60E+02	2.96E+03	1.12E+03	2.45E+02	2.96E+03	9.93E+02	1.59E+02	2.96E+03	1.03E+03
2.97E+03	6.96E+02	1.76E+02	2.97E+03	9.14E+02	1.43E+02	2.97E+03	8.31E+02	2.01E+02	2.97E+03	3.08E+02	9.44E+01	2.97E+03	2.99E+02	3.77E+01	2.97E+03	1.05E+03	1.64E+02	2.97E+03	8.25E+02	1.01E+02	2.97E+03	2.66E+02	8.56E+01	2.97E+03	5.77E+02	9.74E+01	2.97E+03	4.25E+02	1.75E+02	2.97E+03	6.61E+02	1.13E+02	2.97E+03	9.23E+02	2.33E+02	2.97E+03	7.16E+02	1.83E+02	2.97E+03	6.36E+02	1.60E+02	2.97E+03	1.12E+03	2.40E+02	2.97E+03	9.87E+02	1.59E+02	2.97E+03	1.03E+03
2.99E+03	6.97E+02	1.76E+02	2.99E+03	9.10E+02	1.37E+02	2.99E+03	8.28E+02	2.00E+02	2.99E+03	3.12E+02	9.29E+01	2.99E+03	2.95E+02	3.76E+01	2.99E+03	1.04E+03	1.67E+02	2.99E+03	8.19E+02	9.60E+01	2.99E+03	2.63E+02	7.99E+01	2.99E+03	5.80E+02	9.85E+01	2.99E+03	4.31E+02	1.73E+02	2.99E+03	6.64E+02	1.16E+02	2.99E+03	9.15E+02	2.33E+02	2.99E+03	7.17E+02	1.81E+02	2.99E+03	6.39E+02	1.55E+02	2.99E+03	1.12E+03	2.39E+02	2.99E+03	9.81E+02	1.60E+02	2.99E+03	1.02E+03
3.00E+03	6.98E+02	1.75E+02	3.00E+03	9.05E+02	1.33E+02	3.00E+03	8.24E+02	2.00E+02	3.00E+03	3.15E+02	9.05E+01	3.00E+03	2.90E+02	3.40E+01	3.00E+03	1.04E+03	1.65E+02	3.00E+03	8.13E+02	8.99E+01	3.00E+03	2.63E+02	7.79E+01	3.00E+03	5.84E+02	1.01E+02	3.00E+03	4.36E+02	1.70E+02	3.00E+03	6.67E+02	1.21E+02	3.00E+03	9.09E+02	2.32E+02	3.00E+03	7.17E+02	1.81E+02	3.00E+03	6.36E+02	1.49E+02	3.00E+03	1.13E+03	2.42E+02	3.00E+03	9.76E+02	1.61E+02	3.00E+03	1.02E+03
3.02E+03	6.98E+02	1.76E+02	3.02E+03	9.00E+02	1.29E+02	3.02E+03	8.20E+02	2.01E+02	3.02E+03	3.16E+02	8.80E+01	3.02E+03	2.87E+02	3.26E+01	3.02E+03	1.04E+03	1.65E+02	3.02E+03	8.08E+02	8.87E+01	3.02E+03	2.62E+02	7.76E+01	3.02E+03	5.85E+02	1.05E+02	3.02E+03	4.36E+02	1.67E+02	3.02E+03	6.70E+02	1.25E+02	3.02E+03	9.04E+02	2.30E+02	3.02E+03	7.17E+02	1.81E+02	3.02E+03	6.36E+02	1.48E+02	3.02E+03	1.13E+03	2.42E+02	3.02E+03	9.73E+02	1.63E+02	3.02E+03	1.01E+03
3.03E+03	6.98E+02	1.76E+02	3.03E+03	8.97E+02	1.22E+02	3.03E+03	8.17E+02	2.03E+02	3.03E+03	3.17E+02	7.88E+01	3.03E+03	2.83E+02	2.58E+01	3.03E+03	1.03E+03	1.66E+02	3.03E+03	8.02E+02	8.73E+01	3.03E+03	2.66E+02	7.91E+01	3.03E+03	5.86E+02	1.09E+02	3.03E+03	4.41E+02	1.56E+02	3.03E+03	6.67E+02	1.25E+02	3.03E+03	8.98E+02	2.26E+02	3.03E+03	7.17E+02	1.80E+02	3.03E+03	6.35E+02	1.49E+02	3.03E+03	1.13E+03	2.40E+02	3.03E+03	9.71E+02	1.63E+02	3.03E+03	1.00E+03
3.05E+03	6.97E+02	1.76E+02	3.05E+03	8.93E+02	1.19E+02	3.05E+03	8.12E+02	2.02E+02	3.05E+03	3.21E+02	7.25E+01	3.05E+03	2.81E+02	2.46E+01	3.05E+03	1.03E+03	1.65E+02	3.05E+03	7.94E+02	8.44E+01	3.05E+03	2.69E+02	7.76E+01	3.05E+03	5.87E+02	1.10E+02	3.05E+03	4.45E+02	1.53E+02	3.05E+03	6.64E+02	1.26E+02	3.05E+03	8.93E+02	2.24E+02	3.05E+03	7.17E+02	1.82E+02	3.05E+03	6.35E+02	1.48E+02	3.05E+03	1.14E+03	2.38E+02	3.05E+03	9.67E+02	1.56E+02	3.05E+03	9.96E+02
3.06E+03	6.97E+02	1.77E+02	3.06E+03	8.88E+02	1.19E+02	3.06E+03	8.06E+02	2.01E+02	3.06E+03	3.23E+02	6.64E+01	3.06E+03	2.78E+02	2.35E+01	3.06E+03	1.02E+03	1.66E+02	3.06E+03	7.87E+02	8.13E+01	3.06E+03	2.69E+02	7.59E+01	3.06E+03	5.91E+02	1.13E+02	3.06E+03	4.45E+02	1.51E+02	3.06E+03	6.56E+02	1.32E+02	3.06E+03	8.88E+02	2.22E+02	3.06E+03	7.15E+02	1.82E+02	3.06E+03	6.35E+02	1.47E+02	3.06E+03	1.14E+03	2.39E+02	3.06E+03	9.59E+02	1.54E+02	3.06E+03	9.92E+02
3.08E+03	6.95E+02	1.77E+02	3.08E+03	8.83E+02	1.20E+02	3.08E+03	8.01E+02	2.01E+02	3.08E+03	3.30E+02	6.54E+01	3.08E+03	2.75E+02	2.24E+01	3.08E+03	1.02E+03	1.68E+02	3.08E+03	7.79E+02	7.78E+01	3.08E+03	2.67E+02	7.52E+01	3.08E+03	5.90E+02	1.20E+02	3.08E+03	4.50E+02	1.46E+02	3.08E+03	6.49E+02	1.33E+02	3.08E+03	8.83E+02	2.19E+02	3.08E+03	7.12E+02	1.79E+02	3.08E+03	6.41E+02	1.47E+02	3.08E+03	1.14E+03	2.39E+02	3.08E+03	9.52E+02	1.55E+02	3.08E+03	9.89E+02
3.09E+03	6.94E+02	1.77E+02	3.09E+03	8.76E+02	1.23E+02	3.09E+03	7.97E+02	2.01E+02	3.09E+03	3.39E+02	6.53E+01	3.09E+03	2.69E+02	2.21E+01	3.09E+03	1.01E+03	1.67E+02	3.09E+03	7.73E+02	7.69E+01	3.09E+03	2.59E+02	6.70E+01	3.09E+03	5.91E+02	1.24E+02	3.09E+03	4.58E+02	1.47E+02	3.09E+03	6.47E+02	1.30E+02	3.09E+03	8.79E+02	2.16E+02	3.09E+03	7.07E+02	1.75E+02	3.09E+03	6.41E+02	1.51E+02	3.09E+03	1.14E+03	2.40E+02	3.09E+03	9.47E+02	1.55E+02	3.09E+03	9.86E+02
3.11E+03	6.94E+02	1.77E+02	3.11E+03	8.71E+02	1.26E+02	3.11E+03	7.93E+02	2.00E+02	3.11E+03	3.42E+02	6.66E+01	3.11E+03	2.63E+02	1.96E+01	3.11E+03	1.00E+03	1.68E+02	3.11E+03	7.67E+02	7.51E+01	3.11E+03	2.55E+02	6.75E+01	3.11E+03	5.93E+02	1.26E+02	3.11E+03	4.62E+02	1.52E+02	3.11E+03	6.44E+02	1.26E+02	3.11E+03	8.73E+02	2.15E+02	3.11E+03	7.01E+02	1.71E+02	3.11E+03	6.40E+02	1.55E+02	3.11E+03	1.14E+03	2.41E+02	3.11E+03	9.40E+02	1.55E+02	3.11E+03	9.83E+02
3.12E+03	6.92E+02	1.76E+02	3.12E+03	8.65E+02	1.28E+02	3.12E+03	7.88E+02	2.01E+02	3.12E+03	3.47E+02	6.71E+01	3.12E+03	2.57E+02	1.76E+01	3.12E+03	9.99E+02	1.67E+02	3.12E+03	7.65E+02	7.36E+01	3.12E+03	2.53E+02	7.25E+01	3.12E+03	5.94E+02	1.28E+02	3.12E+03	4.64E+02	1.56E+02	3.12E+03	6.47E+02	1.23E+02	3.12E+03	8.68E+02	2.13E+02	3.12E+03	7.00E+02	1.68E+02	3.12E+03	6.41E+02	1.60E+02	3.12E+03	1.15E+03	2.42E+02	3.12E+03	9.34E+02	1.55E+02	3.12E+03	9.79E+02
3.14E+03	6.90E+02	1.78E+02	3.14E+03	8.60E+02	1.30E+02	3.14E+03	7.84E+02	2.03E+02	3.14E+03	3.49E+02	7.02E+01	3.14E+03	2.50E+02	1.83E+01	3.14E+03	9.93E+02	1.64E+02	3.14E+03	7.60E+02	7.47E+01	3.14E+03	2.51E+02	7.82E+01	3.14E+03	5.95E+02	1.33E+02	3.14E+03	4.65E+02	1.60E+02	3.14E+03	6.51E+02	1.18E+02	3.14E+03	8.62E+02	2.11E+02	3.14E+03	7.01E+02	1.65E+02	3.14E+03	6.43E+02	1.62E+02	3.14E+03	1.15E+03	2.43E+02	3.14E+03	9.28E+02	1.53E+02	3.14E+03	9.77E+02
3.15E+03	6.85E+02	1.78E+02	3.15E+03	8.54E+02	1.32E+02	3.15E+03	7.79E+02	2.05E+02	3.15E+03	3.48E+02	7.12E+01	3.15E+03	2.47E+02	2.25E+01	3.15E+03	9.85E+02	1.64E+02	3.15E+03	7.54E+02	7.49E+01	3.15E+03	2.51E+02	8.09E+01	3.15E+03	5.94E+02	1.34E+02	3.15E+03	4.65E+02	1.62E+02	3.15E+03	6.55E+02	1.13E+02	3.15E+03	8.58E+02	2.07E+02	3.15E+03	7.03E+02	1.62E+02	3.15E+03	6.44E+02	1.63E+02	3.15E+03	1.15E+03	2.41E+02	3.15E+03	9.23E+02	1.49E+02	3.15E+03	9.75E+02
3.17E+03	6.81E+02	1.77E+02	3.17E+03	8.47E+02	1.33E+02	3.17E+03	7.73E+02	2.07E+02	3.17E+03	3.47E+02	7.16E+01	3.17E+03	2.45E+02	2.39E+01	3.17E+03	9.81E+02	1.58E+02	3.17E+03	7.49E+02	7.27E+01	3.17E+03	2.50E+02	8.25E+01	3.17E+03	5.92E+02	1.37E+02	3.17E+03	4.69E+02	1.68E+02	3.17E+03	6.54E+02	1.08E+02	3.17E+03	8.53E+02	2.00E+02	3.17E+03	7.04E+02	1.60E+02	3.17E+03	6.43E+02	1.62E+02	3.17E+03	1.16E+03	2.42E+02	3.17E+03	9.18E+02	1.45E+02	3.17E+03	9.75E+02
3.18E+03	6.76E+02	1.75E+02	3.18E+03	8.38E+02	1.36E+02	3.18E+03	7.66E+02	2.09E+02	3.18E+03	3.46E+02	7.52E+01	3.18E+03	2.43E+02	2.76E+01	3.18E+03	9.79E+02	1.54E+02	3.18E+03	7.47E+02	7.17E+01	3.18E+03	2.51E+02	8.45E+01	3.18E+03	5.89E+02	1.40E+02	3.18E+03	4.71E+02	1.75E+02	3.18E+03	6.51E+02	1.09E+02	3.18E+03	8.50E+02	1.96E+02	3.18E+03	7.04E+02	1.57E+02	3.18E+03	6.42E+02	1.61E+02	3.18E+03	1.16E+03	2.40E+02	3.18E+03	9.16E+02	1.43E+02	3.18E+03	9.71E+02
3.20E+03	6.72E+02	1.72E+02	3.20E+03	8.30E+02	1.41E+02	3.20E+03	7.58E+02	2.09E+02	3.20E+03	3.44E+02	8.34E+01	3.20E+03	2.39E+02	2.97E+01	3.20E+03	9.81E+02	1.50E+02	3.20E+03	7.41E+02	7.10E+01	3.20E+03	2.51E+02	8.56E+01	3.20E+03	5.86E+02	1.43E+02	3.20E+03	4.74E+02	1.81E+02	3.20E+03	6.46E+02	1.09E+02	3.20E+03	8.49E+02	1.91E+02	3.20E+03	7.03E+02	1.56E+02	3.20E+03	6.43E+02	1.61E+02	3.20E+03	1.16E+03	2.37E+02	3.20E+03	9.15E+02	1.44E+02	3.20E+03	9.69E+02
3.21E+03	6.68E+02	1.69E+02	3.21E+03	8.24E+02	1.41E+02	3.21E+03	7.53E+02	2.07E+02	3.21E+03	3.46E+02	9.04E+01	3.21E+03	2.34E+02	2.92E+01	3.21E+03	9.86E+02	1.47E+02	3.21E+03	7.34E+02	7.05E+01	3.21E+03	2.50E+02	8.50E+01	3.21E+03	5.84E+02	1.45E+02	3.21E+03	4.77E+02	1.83E+02	3.21E+03	6.44E+02	1.02E+02	3.21E+03	8.44E+02	1.91E+02	3.21E+03	7.00E+02	1.53E+02	3.21E+03	6.44E+02	1.61E+02	3.21E+03	1.16E+03	2.34E+02	3.21E+03	9.08E+02	1.47E+02	3.21E+03	9.69E+02
3.23E+03	6.63E+02	1.68E+02	3.23E+03	8.14E+02	1.40E+02	3.23E+03	7.47E+02	2.05E+02	3.23E+03	3.43E+02	9.41E+01	3.23E+03	2.31E+02	3.10E+01	3.23E+03	9.90E+02	1.46E+02	3.23E+03	7.25E+02	7.45E+01	3.23E+03	2.51E+02	8.59E+01	3.23E+03	5.79E+02	1.45E+02	3.23E+03	4.81E+02	1.85E+02	3.23E+03	6.47E+02	9.81E+01	3.23E+03	8.37E+02	1.94E+02	3.23E+03	6.98E+02	1.49E+02	3.23E+03	6.45E+02	1.62E+02	3.23E+03	1.17E+03	2.31E+02	3.23E+03	9.02E+02	1.46E+02	3.23E+03	9.70E+02
3.24E+03	6.59E+02	1.65E+02	3.24E+03	8.06E+02	1.38E+02	3.24E+03	7.43E+02	2.03E+02	3.24E+03	3.36E+02	9.68E+01	3.24E+03	2.28E+02	3.18E+01	3.24E+03	9.93E+02	1.44E+02	3.24E+03	7.24E+02	7.55E+01	3.24E+03	2.51E+02	8.70E+01	3.24E+03	5.76E+02	1.42E+02	3.24E+03	4.89E+02	1.83E+02	3.24E+03	6.45E+02	9.42E+01	3.24E+03	8.31E+02	1.94E+02	3.24E+03	6.95E+02	1.44E+02	3.24E+03	6.44E+02	1.64E+02	3.24E+03	1.17E+03	2.29E+02	3.24E+03	9.02E+02	1.45E+02	3.24E+03	9.69E+02
3.26E+03	6.57E+02	1.59E+02	3.26E+03	7.96E+02	1.34E+02	3.26E+03	7.38E+02	2.03E+02	3.26E+03	3.30E+02	1.01E+02	3.26E+03	2.23E+02	3.01E+01	3.26E+03	9.98E+02	1.39E+02	3.26E+03	7.20E+02	8.28E+01	3.26E+03	2.57E+02	9.04E+01	3.26E+03	5.75E+02	1.40E+02	3.26E+03	4.97E+02	1.86E+02	3.26E+03	6.39E+02	9.38E+01	3.26E+03	8.24E+02	1.93E+02	3.26E+03	6.91E+02	1.40E+02	3.26E+03	6.44E+02	1.66E+02	3.26E+03	1.17E+03	2.30E+02	3.26E+03	9.01E+02	1.45E+02	3.26E+03	9.66E+02
3.27E+03	6.54E+02	1.56E+02	3.27E+03	7.89E+02	1.32E+02	3.27E+03	7.38E+02	2.02E+02	3.27E+03	3.23E+02	1.05E+02	3.27E+03	2.19E+02	2.60E+01	3.27E+03	1.00E+03	1.41E+02	3.27E+03	7.16E+02	8.70E+01	3.27E+03	2.64E+02	8.88E+01	3.27E+03	5.73E+02	1.40E+02	3.27E+03	5.00E+02	1.82E+02	3.27E+03	6.38E+02	9.93E+01	3.27E+03	8.20E+02	1.94E+02	3.27E+03	6.89E+02	1.39E+02	3.27E+03	6.51E+02	1.69E+02	3.27E+03	1.17E+03	2.30E+02	3.27E+03	8.96E+02	1.47E+02	3.27E+03	9.63E+02
3.29E+03	6.50E+02	1.54E+02	3.29E+03	7.80E+02	1.31E+02	3.29E+03	7.36E+02	2.04E+02	3.29E+03	3.19E+02	1.06E+02	3.29E+03	2.16E+02	2.19E+01	3.29E+03	1.01E+03	1.44E+02	3.29E+03	7.05E+02	8.84E+01	3.29E+03	2.71E+02	8.73E+01	3.29E+03	5.71E+02	1.42E+02	3.29E+03	5.00E+02	1.82E+02	3.29E+03	6.40E+02	1.03E+02	3.29E+03	8.16E+02	1.95E+02	3.29E+03	6.84E+02	1.38E+02	3.29E+03	6.51E+02	1.69E+02	3.29E+03	1.17E+03	2.31E+02	3.29E+03	8.89E+02	1.53E+02	3.29E+03	9.65E+02
3.30E+03	6.45E+02	1.54E+02	3.30E+03	7.74E+02	1.34E+02	3.30E+03	7.30E+02	2.04E+02	3.30E+03	3.18E+02	1.09E+02	3.30E+03	2.09E+02	2.31E+01	3.30E+03	1.01E+03	1.52E+02	3.30E+03	7.01E+02	8.72E+01	3.30E+03	2.75E+02	8.78E+01	3.30E+03	5.70E+02	1.44E+02	3.30E+03	5.00E+02	1.82E+02	3.30E+03	6.40E+02	1.08E+02	3.30E+03	8.10E+02	1.97E+02	3.30E+03	6.79E+02	1.37E+02	3.30E+03	6.49E+02	1.72E+02	3.30E+03	1.18E+03	2.32E+02	3.30E+03	8.87E+02	1.59E+02	3.30E+03	9.65E+02
3.32E+03	6.39E+02	1.56E+02	3.32E+03	7.69E+02	1.38E+02	3.32E+03	7.26E+02	2.06E+02	3.32E+03	3.17E+02	1.15E+02	3.32E+03	2.02E+02	2.43E+01	3.32E+03	1.01E+03	1.55E+02	3.32E+03	6.96E+02	8.79E+01	3.32E+03	2.78E+02	9.16E+01	3.32E+03	5.69E+02	1.48E+02	3.32E+03	4.99E+02	1.82E+02	3.32E+03	6.38E+02	1.13E+02	3.32E+03	8.05E+02	1.97E+02	3.32E+03	6.75E+02	1.36E+02	3.32E+03	6.54E+02	1.74E+02	3.32E+03	1.18E+03	2.32E+02	3.32E+03	8.84E+02	1.62E+02	3.32E+03	9.65E+02
3.33E+03	6.32E+02	1.58E+02	3.33E+03	7.62E+02	1.41E+02	3.33E+03	7.20E+02	2.06E+02	3.33E+03	3.12E+02	1.24E+02	3.33E+03	1.98E+02	2.25E+01	3.33E+03	1.01E+03	1.59E+02	3.33E+03	6.90E+02	8.81E+01	3.33E+03	2.83E+02	9.55E+01	3.33E+03	5.69E+02	1.52E+02	3.33E+03	4.99E+02	1.84E+02	3.33E+03	6.34E+02	1.18E+02	3.33E+03	8.00E+02	1.95E+02	3.33E+03	6.72E+02	1.34E+02	3.33E+03	6.56E+02	1.76E+02	3.33E+03	1.18E+03	2.32E+02	3.33E+03	8.82E+02	1.65E+02	3.33E+03	9.62E+02
3.35E+03	6.26E+02	1.60E+02	3.35E+03	7.57E+02	1.43E+02	3.35E+03	7.15E+02	2.10E+02	3.35E+03	3.07E+02	1.29E+02	3.35E+03	1.94E+02	2.09E+01	3.35E+03	1.01E+03	1.63E+02	3.35E+03	6.84E+02	8.82E+01	3.35E+03	2.91E+02	9.49E+01	3.35E+03	5.69E+02	1.55E+02	3.35E+03	4.99E+02	1.83E+02	3.35E+03	6.29E+02	1.18E+02	3.35E+03	7.96E+02	1.96E+02	3.35E+03	6.65E+02	1.32E+02	3.35E+03	6.55E+02	1.78E+02	3.35E+03	1.18E+03	2.31E+02	3.35E+03	8.81E+02	1.67E+02	3.35E+03	9.61E+02
3.36E+03	6.21E+02	1.61E+02	3.36E+03	7.53E+02	1.47E+02	3.36E+03	7.09E+02	2.15E+02	3.36E+03	3.01E+02	1.33E+02	3.36E+03	1.91E+02	2.02E+01	3.36E+03	1.00E+03	1.64E+02	3.36E+03	6.80E+02	8.75E+01	3.36E+03	2.96E+02	9.20E+01	3.36E+03	5.70E+02	1.57E+02	3.36E+03	4.99E+02	1.83E+02	3.36E+03	6.29E+02	1.22E+02	3.36E+03	7.93E+02	1.94E+02	3.36E+03	6.60E+02	1.32E+02	3.36E+03	6.52E+02	1.79E+02	3.36E+03	1.19E+03	2.30E+02	3.36E+03	8.78E+02	1.70E+02	3.36E+03	9.60E+02
3.38E+03	6.16E+02	1.63E+02	3.38E+03	7.50E+02	1.50E+02	3.38E+03	7.05E+02	2.20E+02	3.38E+03	2.96E+02	1.33E+02	3.38E+03	1.91E+02	1.91E+01	3.38E+03	1.00E+03	1.65E+02	3.38E+03	6.71E+02	8.81E+01	3.38E+03	2.99E+02	8.66E+01	3.38E+03	5.69E+02	1.59E+02	3.38E+03	4.99E+02	1.83E+02	3.38E+03	6.23E+02	1.26E+02	3.38E+03	7.86E+02	1.95E+02	3.38E+03	6.54E+02	1.30E+02	3.38E+03	6.44E+02	1.84E+02	3.38E+03	1.19E+03	2.29E+02	3.38E+03	8.77E+02	1.73E+02	3.38E+03	9.60E+02
3.39E+03	6.09E+02	1.65E+02	3.39E+03	7.44E+02	1.51E+02	3.39E+03	7.01E+02	2.26E+02	3.39E+03	2.88E+02	1.36E+02	3.39E+03	1.91E+02	1.86E+01	3.39E+03	1.00E+03	1.64E+02	3.39E+03	6.63E+02	8.71E+01	3.39E+03	2.96E+02	7.93E+01	3.39E+03	5.68E+02	1.62E+02	3.39E+03	4.99E+02	1.83E+02	3.39E+03	6.15E+02	1.27E+02	3.39E+03	7.84E+02	1.99E+02	3.39E+03	6.47E+02	1.29E+02	3.39E+03	6.39E+02	1.86E+02	3.39E+03	1.19E+03	2.29E+02	3.39E+03	8.73E+02	1.77E+02	3.39E+03	9.61E+02
3.41E+03	6.03E+02	1.66E+02	3.41E+03	7.36E+02	1.53E+02	3.41E+03	6.96E+02	2.30E+02	3.41E+03	2.81E+02	1.37E+02	3.41E+03	1.91E+02	1.90E+01	3.41E+03	1.00E+03	1.62E+02	3.41E+03	6.61E+02	8.69E+01	3.41E+03	2.95E+02	7.38E+01	3.41E+03	5.65E+02	1.64E+02	3.41E+03	4.98E+02	1.83E+02	3.41E+03	6.08E+02	1.30E+02	3.41E+03	7.81E+02	2.03E+02	3.41E+03	6.41E+02	1.28E+02	3.41E+03	6.33E+02	1.83E+02	3.41E+03	1.19E+03	2.30E+02	3.41E+03	8.67E+02	1.80E+02	3.41E+03	9.61E+02
3.42E+03	5.95E+02	1.66E+02	3.42E+03	7.28E+02	1.54E+02	3.42E+03	6.93E+02	2.29E+02	3.42E+03	2.77E+02	1.38E+02	3.42E+03	1.91E+02	1.91E+01	3.42E+03	1.00E+03	1.62E+02	3.42E+03	6.58E+02	8.69E+01	3.42E+03	2.94E+02	6.94E+01	3.42E+03	5.62E+02	1.67E+02	3.42E+03	4.99E+02	1.82E+02	3.42E+03	6.02E+02	1.31E+02	3.42E+03	7.75E+02	2.08E+02	3.42E+03	6.34E+02	1.29E+02	3.42E+03	6.40E+02	1.90E+02	3.42E+03	1.20E+03	2.31E+02	3.42E+03	8.62E+02	1.80E+02	3.42E+03	9.61E+02
3.44E+03	5.86E+02	1.63E+02	3.44E+03	7.21E+02	1.53E+02	3.44E+03	6.87E+02	2.36E+02	3.44E+03	2.75E+02	1.41E+02	3.44E+03	1.88E+02	2.00E+01	3.44E+03	9.94E+02	1.59E+02	3.44E+03	6.58E+02	8.92E+01	3.44E+03	2.92E+02	6.33E+01	3.44E+03	5.60E+02	1.69E+02	3.44E+03	4.99E+02	1.82E+02	3.44E+03	5.93E+02	1.32E+02	3.44E+03	7.69E+02	2.13E+02	3.44E+03	6.27E+02	1.29E+02	3.44E+03	6.47E+02	1.97E+02	3.44E+03	1.20E+03	2.30E+02	3.44E+03	8.58E+02	1.79E+02	3.44E+03	9.64E+02
3.45E+03	5.77E+02	1.65E+02	3.45E+03	7.15E+02	1.49E+02	3.45E+03	6.84E+02	2.43E+02	3.45E+03	2.69E+02	1.44E+02	3.45E+03	1.85E+02	2.34E+01	3.45E+03	9.87E+02	1.67E+02	3.45E+03	6.52E+02	8.61E+01	3.45E+03	2.91E+02	5.83E+01	3.45E+03	5.58E+02	1.71E+02	3.45E+03	4.97E+02	1.82E+02	3.45E+03	5.85E+02	1.32E+02	3.45E+03	7.66E+02	2.16E+02	3.45E+03	6.19E+02	1.31E+02	3.45E+03	6.46E+02	2.00E+02	3.45E+03	1.20E+03	2.30E+02	3.45E+03	8.54E+02	1.78E+02	3.45E+03	9.63E+02
3.47E+03	5.68E+02	1.68E+02	3.47E+03	7.10E+02	1.47E+02	3.47E+03	6.77E+02	2.44E+02	3.47E+03	2.68E+02	1.44E+02	3.47E+03	1.82E+02	2.86E+01	3.47E+03	9.87E+02	1.72E+02	3.47E+03	6.46E+02	8.29E+01	3.47E+03	2.92E+02	5.48E+01	3.47E+03	5.52E+02	1.74E+02	3.47E+03	4.94E+02	1.80E+02	3.47E+03	5.77E+02	1.33E+02	3.47E+03	7.60E+02	2.17E+02	3.47E+03	6.12E+02	1.34E+02	3.47E+03	6.46E+02	2.01E+02	3.47E+03	1.20E+03	2.30E+02	3.47E+03	8.50E+02	1.78E+02	3.47E+03	9.61E+02
3.48E+03	5.63E+02	1.74E+02	3.48E+03	7.04E+02	1.47E+02	3.48E+03	6.71E+02	2.44E+02	3.48E+03	2.67E+02	1.44E+02	3.48E+03	1.79E+02	3.12E+01	3.48E+03	9.86E+02	1.77E+02	3.48E+03	6.39E+02	8.25E+01	3.48E+03	2.95E+02	5.10E+01	3.48E+03	5.46E+02	1.76E+02	3.48E+03	4.93E+02	1.79E+02	3.48E+03	5.69E+02	1.32E+02	3.48E+03	7.55E+02	2.21E+02	3.48E+03	6.05E+02	1.38E+02	3.48E+03	6.45E+02	2.02E+02	3.48E+03	1.20E+03	2.30E+02	3.48E+03	8.44E+02	1.77E+02	3.48E+03	9.64E+02
3.50E+03	5.59E+02	1.80E+02	3.50E+03	6.99E+02	1.47E+02	3.50E+03	6.66E+02	2.45E+02	3.50E+03	2.68E+02	1.44E+02	3.50E+03	1.78E+02	3.52E+01	3.50E+03	9.85E+02	1.84E+02	3.50E+03	6.33E+02	8.22E+01	3.50E+03	3.02E+02	4.78E+01	3.50E+03	5.41E+02	1.76E+02	3.50E+03	4.89E+02	1.78E+02	3.50E+03	5.61E+02	1.32E+02	3.50E+03	7.47E+02	2.22E+02	3.50E+03	5.95E+02	1.36E+02	3.50E+03	6.46E+02	2.03E+02	3.50E+03	1.20E+03	2.30E+02	3.50E+03	8.37E+02	1.76E+02	3.50E+03	9.70E+02
3.51E+03	5.51E+02	1.83E+02	3.51E+03	6.95E+02	1.46E+02	3.51E+03	6.59E+02	2.47E+02	3.51E+03	2.69E+02	1.44E+02	3.51E+03	1.76E+02	4.03E+01	3.51E+03	9.84E+02	1.87E+02	3.51E+03	6.26E+02	8.20E+01	3.51E+03	3.10E+02	5.01E+01	3.51E+03	5.35E+02	1.73E+02	3.51E+03	4.84E+02	1.77E+02	3.51E+03	5.55E+02	1.32E+02	3.51E+03	7.41E+02	2.25E+02	3.51E+03	5.88E+02	1.33E+02	3.51E+03	6.48E+02	2.02E+02	3.51E+03	1.20E+03	2.30E+02	3.51E+03	8.32E+02	1.76E+02	3.51E+03	9.70E+02
3.53E+03	5.45E+02	1.87E+02	3.53E+03	6.92E+02	1.48E+02	3.53E+03	6.54E+02	2.46E+02	3.53E+03	2.73E+02	1.43E+02	3.53E+03	1.76E+02	4.57E+01	3.53E+03	9.85E+02	1.89E+02	3.53E+03	6.21E+02	8.23E+01	3.53E+03	3.15E+02	5.35E+01	3.53E+03	5.31E+02	1.70E+02	3.53E+03	4.79E+02	1.75E+02	3.53E+03	5.47E+02	1.32E+02	3.53E+03	7.33E+02	2.29E+02	3.53E+03	5.81E+02	1.34E+02	3.53E+03	6.50E+02	2.02E+02	3.53E+03	1.20E+03	2.31E+02	3.53E+03	8.28E+02	1.78E+02	3.53E+03	9.69E+02
3.54E+03	5.38E+02	1.89E+02	3.54E+03	6.92E+02	1.52E+02	3.54E+03	6.51E+02	2.44E+02	3.54E+03	2.82E+02	1.41E+02	3.54E+03	1.79E+02	4.77E+01	3.54E+03	9.85E+02	1.92E+02	3.54E+03	6.16E+02	8.27E+01	3.54E+03	3.24E+02	5.18E+01	3.54E+03	5.26E+02	1.68E+02	3.54E+03	4.75E+02	1.76E+02	3.54E+03	5.41E+02	1.32E+02	3.54E+03	7.30E+02	2.37E+02	3.54E+03	5.73E+02	1.37E+02	3.54E+03	6.51E+02	2.02E+02	3.54E+03	1.20E+03	2.30E+02	3.54E+03	8.22E+02	1.81E+02	3.54E+03	9.70E+02
3.56E+03	5.32E+02	1.89E+02	3.56E+03	6.89E+02	1.55E+02	3.56E+03	6.43E+02	2.42E+02	3.56E+03	2.87E+02	1.40E+02	3.56E+03	1.82E+02	4.92E+01	3.56E+03	9.79E+02	1.98E+02	3.56E+03	6.09E+02	8.40E+01	3.56E+03	3.29E+02	5.02E+01	3.56E+03	5.22E+02	1.69E+02	3.56E+03	4.68E+02	1.76E+02	3.56E+03	5.33E+02	1.33E+02	3.56E+03	7.27E+02	2.41E+02	3.56E+03	5.64E+02	1.42E+02	3.56E+03	6.50E+02	2.03E+02	3.56E+03	1.20E+03	2.30E+02	3.56E+03	8.14E+02	1.82E+02	3.56E+03	9.76E+02
3.57E+03	5.26E+02	1.87E+02	3.57E+03	6.89E+02	1.60E+02	3.57E+03	6.35E+02	2.44E+02	3.57E+03	2.90E+02	1.41E+02	3.57E+03	1.85E+02	5.36E+01	3.57E+03	9.69E+02	2.01E+02	3.57E+03	6.04E+02	8.32E+01	3.57E+03	3.31E+02	5.07E+01	3.57E+03	5.19E+02	1.69E+02	3.57E+03	4.65E+02	1.71E+02	3.57E+03	5.27E+02	1.35E+02	3.57E+03	7.22E+02	2.42E+02	3.57E+03	5.56E+02	1.44E+02	3.57E+03	6.53E+02	2.07E+02	3.57E+03	1.20E+03	2.30E+02	3.57E+03	8.07E+02	1.81E+02	3.57E+03	9.83E+02
3.59E+03	5.18E+02	1.85E+02	3.59E+03	6.91E+02	1.64E+02	3.59E+03	6.28E+02	2.44E+02	3.59E+03	2.92E+02	1.43E+02	3.59E+03	1.86E+02	5.93E+01	3.59E+03	9.59E+02	2.06E+02	3.59E+03	6.00E+02	8.18E+01	3.59E+03	3.37E+02	5.35E+01	3.59E+03	5.16E+02	1.70E+02	3.59E+03	4.64E+02	1.69E+02	3.59E+03	5.23E+02	1.34E+02	3.59E+03	7.15E+02	2.41E+02	3.59E+03	5.47E+02	1.43E+02	3.59E+03	6.55E+02	2.12E+02	3.59E+03	1.19E+03	2.27E+02	3.59E+03	8.01E+02	1.79E+02	3.59E+03	9.89E+02
3.60E+03	5.20E+02	1.82E+02	3.60E+03	6.95E+02	1.66E+02	3.60E+03	6.24E+02	2.39E+02	3.60E+03	2.97E+02	1.46E+02	3.60E+03	1.88E+02	6.05E+01	3.60E+03	9.55E+02	2.11E+02	3.60E+03	5.95E+02	8.05E+01	3.60E+03	3.43E+02	6.02E+01	3.60E+03	5.13E+02	1.71E+02	3.60E+03	4.61E+02	1.69E+02	3.60E+03	5.17E+02	1.35E+02	3.60E+03	7.07E+02	2.37E+02	3.60E+03	5.39E+02	1.39E+02	3.60E+03	6.57E+02	2.11E+02	3.60E+03	1.19E+03	2.21E+02	3.60E+03	7.98E+02	1.78E+02	3.60E+03	9.94E+02
3.62E+03	5.13E+02	1.81E+02	3.62E+03	6.99E+02	1.70E+02	3.62E+03	6.23E+02	2.34E+02	3.62E+03	3.04E+02	1.51E+02	3.62E+03	1.91E+02	6.20E+01	3.62E+03	9.52E+02	2.17E+02	3.62E+03	5.90E+02	7.90E+01	3.62E+03	3.47E+02	6.27E+01	3.62E+03	5.09E+02	1.70E+02	3.62E+03	4.61E+02	1.70E+02	3.62E+03	5.10E+02	1.36E+02	3.62E+03	7.02E+02	2.30E+02	3.62E+03	5.35E+02	1.36E+02	3.62E+03	6.56E+02	2.11E+02	3.62E+03	1.19E+03	2.15E+02	3.62E+03	7.95E+02	1.78E+02	3.62E+03	9.93E+02
3.63E+03	5.06E+02	1.82E+02	3.63E+03	7.03E+02	1.69E+02	3.63E+03	6.20E+02	2.27E+02	3.63E+03	3.11E+02	1.59E+02	3.63E+03	1.95E+02	6.23E+01	3.63E+03	9.44E+02	2.23E+02	3.63E+03	5.84E+02	7.77E+01	3.63E+03	3.50E+02	6.50E+01	3.63E+03	5.05E+02	1.72E+02	3.63E+03	4.60E+02	1.72E+02	3.63E+03	5.04E+02	1.38E+02	3.63E+03	6.97E+02	2.33E+02	3.63E+03	5.27E+02	1.34E+02	3.63E+03	6.59E+02	2.16E+02	3.63E+03	1.19E+03	2.08E+02	3.63E+03	7.90E+02	1.77E+02	3.63E+03	9.94E+02
3.65E+03	4.99E+02	1.88E+02	3.65E+03	7.09E+02	1.65E+02	3.65E+03	6.14E+02	2.25E+02	3.65E+03	3.14E+02	1.62E+02	3.65E+03	1.99E+02	6.26E+01	3.65E+03	9.40E+02	2.29E+02	3.65E+03	5.80E+02	7.61E+01	3.65E+03	3.53E+02	6.69E+01	3.65E+03	5.02E+02	1.73E+02	3.65E+03	4.59E+02	1.75E+02	3.65E+03	4.97E+02	1.39E+02	3.65E+03	6.91E+02	2.36E+02	3.65E+03	5.23E+02	1.33E+02	3.65E+03	6.63E+02	2.20E+02	3.65E+03	1.19E+03	2.04E+02	3.65E+03	7.82E+02	1.81E+02	3.65E+03	9.94E+02
3.66E+03	4.91E+02	1.90E+02	3.66E+03	7.07E+02	1.59E+02	3.66E+03	6.07E+02	2.31E+02	3.66E+03	3.10E+02	1.70E+02	3.66E+03	2.03E+02	6.45E+01	3.66E+03	9.38E+02	2.30E+02	3.66E+03	5.74E+02	7.71E+01	3.66E+03	3.57E+02	6.62E+01	3.66E+03	4.97E+02	1.74E+02	3.66E+03	4.57E+02	1.77E+02	3.66E+03	4.90E+02	1.37E+02	3.66E+03	6.85E+02	2.40E+02	3.66E+03	5.17E+02	1.34E+02	3.66E+03	6.68E+02	2.25E+02	3.66E+03	1.19E+03	2.03E+02	3.66E+03	7.76E+02	1.81E+02	3.66E+03	9.96E+02
3.68E+03	4.84E+02	1.93E+02	3.68E+03	7.05E+02	1.55E+02	3.68E+03	6.01E+02	2.35E+02	3.68E+03	3.06E+02	1.74E+02	3.68E+03	2.08E+02	6.68E+01	3.68E+03	9.35E+02	2.32E+02	3.68E+03	5.70E+02	7.98E+01	3.68E+03	3.57E+02	5.90E+01	3.68E+03	4.91E+02	1.75E+02	3.68E+03	4.56E+02	1.80E+02	3.68E+03	4.85E+02	1.36E+02	3.68E+03	6.79E+02	2.43E+02	3.68E+03	5.13E+02	1.35E+02	3.68E+03	6.71E+02	2.30E+02	3.68E+03	1.19E+03	2.02E+02	3.68E+03	7.72E+02	1.85E+02	3.68E+03	1.00E+03
3.69E+03	4.77E+02	1.95E+02	3.69E+03	7.05E+02	1.52E+02	3.69E+03	5.89E+02	2.36E+02	3.69E+03	3.03E+02	1.82E+02	3.69E+03	2.14E+02	6.56E+01	3.69E+03	9.33E+02	2.37E+02	3.69E+03	5.65E+02	8.46E+01	3.69E+03	3.58E+02	5.66E+01	3.69E+03	4.89E+02	1.76E+02	3.69E+03	4.49E+02	1.83E+02	3.69E+03	4.77E+02	1.34E+02	3.69E+03	6.75E+02	2.43E+02	3.69E+03	5.08E+02	1.34E+02	3.69E+03	6.70E+02	2.36E+02	3.69E+03	1.19E+03	2.02E+02	3.69E+03	7.65E+02	1.87E+02	3.69E+03	1.01E+03
3.71E+03	4.72E+02	1.92E+02	3.71E+03	7.08E+02	1.50E+02	3.71E+03	5.86E+02	2.39E+02	3.71E+03	3.05E+02	1.85E+02	3.71E+03	2.24E+02	6.54E+01	3.71E+03	9.31E+02	2.43E+02	3.71E+03	5.58E+02	8.47E+01	3.71E+03	3.60E+02	5.59E+01	3.71E+03	4.84E+02	1.77E+02	3.71E+03	4.40E+02	1.87E+02	3.71E+03	4.71E+02	1.32E+02	3.71E+03	6.70E+02	2.45E+02	3.71E+03	5.03E+02	1.37E+02	3.71E+03	6.62E+02	2.41E+02	3.71E+03	1.19E+03	2.03E+02	3.71E+03	7.63E+02	1.89E+02	3.71E+03	1.01E+03
3.72E+03	4.65E+02	1.91E+02	3.72E+03	7.08E+02	1.40E+02	3.72E+03	5.80E+02	2.44E+02	3.72E+03	3.05E+02	1.85E+02	3.72E+03	2.29E+02	6.59E+01	3.72E+03	9.29E+02	2.51E+02	3.72E+03	5.51E+02	8.49E+01	3.72E+03	3.59E+02	5.66E+01	3.72E+03	4.79E+02	1.76E+02	3.72E+03	4.34E+02	1.89E+02	3.72E+03	4.64E+02	1.28E+02	3.72E+03	6.67E+02	2.53E+02	3.72E+03	5.00E+02	1.41E+02	3.72E+03	6.60E+02	2.48E+02	3.72E+03	1.20E+03	2.03E+02	3.72E+03	7.61E+02	1.94E+02	3.72E+03	1.01E+03
3.74E+03	4.58E+02	1.90E+02	3.74E+03	7.09E+02	1.37E+02	3.74E+03	5.74E+02	2.38E+02	3.74E+03	3.05E+02	1.89E+02	3.74E+03	2.34E+02	7.02E+01	3.74E+03	9.26E+02	2.56E+02	3.74E+03	5.45E+02	8.71E+01	3.74E+03	3.58E+02	4.67E+01	3.74E+03	4.76E+02	1.76E+02	3.74E+03	4.30E+02	1.91E+02	3.74E+03	4.60E+02	1.26E+02	3.74E+03	6.65E+02	2.60E+02	3.74E+03	4.96E+02	1.39E+02	3.74E+03	6.56E+02	2.53E+02	3.74E+03	1.20E+03	2.02E+02	3.74E+03	7.55E+02	1.95E+02	3.74E+03	1.02E+03
3.75E+03	4.49E+02	1.92E+02	3.75E+03	7.04E+02	1.32E+02	3.75E+03	5.65E+02	2.37E+02	3.75E+03	3.06E+02	1.96E+02	3.75E+03	2.37E+02	7.46E+01	3.75E+03	9.23E+02	2.61E+02	3.75E+03	5.38E+02	8.99E+01	3.75E+03	3.57E+02	3.85E+01	3.75E+03	4.71E+02	1.74E+02	3.75E+03	4.27E+02	1.90E+02	3.75E+03	4.54E+02	1.24E+02	3.75E+03	6.59E+02	2.67E+02	3.75E+03	4.90E+02	1.35E+02	3.75E+03	6.54E+02	2.59E+02	3.75E+03	1.20E+03	2.02E+02	3.75E+03	7.51E+02	1.94E+02	3.75E+03	1.03E+03
3.77E+03	4.43E+02	1.95E+02	3.77E+03	7.02E+02	1.28E+02	3.77E+03	5.59E+02	2.35E+02	3.77E+03	3.12E+02	2.01E+02	3.77E+03	2.44E+02	7.47E+01	3.77E+03	9.21E+02	2.62E+02	3.77E+03	5.35E+02	9.28E+01	3.77E+03	3.52E+02	3.56E+01	3.77E+03	4.64E+02	1.74E+02	3.77E+03	4.22E+02	1.88E+02	3.77E+03	4.49E+02	1.22E+02	3.77E+03	6.54E+02	2.77E+02	3.77E+03	4.86E+02	1.35E+02	3.77E+03	6.53E+02	2.64E+02	3.77E+03	1.20E+03	2.02E+02	3.77E+03	7.45E+02	1.96E+02	3.77E+03	1.03E+03
3.78E+03	4.34E+02	1.97E+02	3.78E+03	7.00E+02	1.21E+02	3.78E+03	5.55E+02	2.30E+02	3.78E+03	3.16E+02	2.09E+02	3.78E+03	2.49E+02	7.26E+01	3.78E+03	9.23E+02	2.67E+02	3.78E+03	5.32E+02	9.56E+01	3.78E+03	3.51E+02	4.02E+01	3.78E+03	4.59E+02	1.73E+02	3.78E+03	4.15E+02	1.86E+02	3.78E+03	4.44E+02	1.20E+02	3.78E+03	6.51E+02	2.85E+02	3.78E+03	4.78E+02	1.32E+02	3.78E+03	6.53E+02	2.68E+02	3.78E+03	1.20E+03	2.02E+02	3.78E+03	7.38E+02	1.90E+02	3.78E+03	1.03E+03
3.80E+03	4.28E+02	1.93E+02	3.80E+03	6.96E+02	1.21E+02	3.80E+03	5.49E+02	2.24E+02	3.80E+03	3.18E+02	2.17E+02	3.80E+03	2.56E+02	6.66E+01	3.80E+03	9.20E+02	2.73E+02	3.80E+03	5.28E+02	9.73E+01	3.80E+03	3.46E+02	3.69E+01	3.80E+03	4.53E+02	1.75E+02	3.80E+03	4.05E+02	1.88E+02	3.80E+03	4.35E+02	1.17E+02	3.80E+03	6.54E+02	2.91E+02	3.80E+03	4.74E+02	1.31E+02	3.80E+03	6.50E+02	2.73E+02	3.80E+03	1.20E+03	2.02E+02	3.80E+03	7.33E+02	1.86E+02	3.80E+03	1.04E+03
3.81E+03	4.21E+02	1.93E+02	3.81E+03	6.91E+02	1.24E+02	3.81E+03	5.45E+02	2.24E+02	3.81E+03	3.13E+02	2.22E+02	3.81E+03	2.63E+02	6.38E+01	3.81E+03	9.13E+02	2.77E+02	3.81E+03	5.23E+02	9.85E+01	3.81E+03	3.40E+02	3.36E+01	3.81E+03	4.49E+02	1.76E+02	3.81E+03	3.99E+02	1.91E+02	3.81E+03	4.29E+02	1.14E+02	3.81E+03	6.54E+02	2.99E+02	3.81E+03	4.68E+02	1.29E+02	3.81E+03	6.48E+02	2.79E+02	3.81E+03	1.20E+03	2.02E+02	3.81E+03	7.32E+02	1.81E+02	3.81E+03	1.04E+03
3.83E+03	4.14E+02	1.96E+02	3.83E+03	6.88E+02	1.26E+02	3.83E+03	5.41E+02	2.25E+02	3.83E+03	3.09E+02	2.19E+02	3.83E+03	2.69E+02	6.07E+01	3.83E+03	9.07E+02	2.79E+02	3.83E+03	5.16E+02	1.00E+02	3.83E+03	3.37E+02	3.19E+01	3.83E+03	4.44E+02	1.77E+02	3.83E+03	3.93E+02	1.93E+02	3.83E+03	4.21E+02	1.17E+02	3.83E+03	6.49E+02	3.03E+02	3.83E+03	4.60E+02	1.26E+02	3.83E+03	6.47E+02	2.80E+02	3.83E+03	1.20E+03	2.01E+02	3.83E+03	7.30E+02	1.80E+02	3.83E+03	1.04E+03
3.84E+03	4.11E+02	1.97E+02	3.84E+03	6.89E+02	1.27E+02	3.84E+03	5.36E+02	2.23E+02	3.84E+03	2.99E+02	2.14E+02	3.84E+03	2.74E+02	6.76E+01	3.84E+03	9.02E+02	2.80E+02	3.84E+03	5.09E+02	1.02E+02	3.84E+03	3.32E+02	2.85E+01	3.84E+03	4.38E+02	1.78E+02	3.84E+03	3.86E+02	1.95E+02	3.84E+03	4.15E+02	1.18E+02	3.84E+03	6.43E+02	3.05E+02	3.84E+03	4.53E+02	1.24E+02	3.84E+03	6.45E+02	2.82E+02	3.84E+03	1.20E+03	2.00E+02	3.84E+03	7.31E+02	1.75E+02	3.84E+03	1.05E+03
3.86E+03	4.05E+02	1.97E+02	3.86E+03	6.90E+02	1.33E+02	3.86E+03	5.31E+02	2.21E+02	3.86E+03	2.92E+02	2.12E+02	3.86E+03	2.76E+02	7.33E+01	3.86E+03	9.01E+02	2.77E+02	3.86E+03	5.03E+02	1.02E+02	3.86E+03	3.29E+02	2.51E+01	3.86E+03	4.33E+02	1.78E+02	3.86E+03	3.80E+02	1.98E+02	3.86E+03	4.09E+02	1.16E+02	3.86E+03	6.35E+02	3.04E+02	3.86E+03	4.48E+02	1.24E+02	3.86E+03	6.39E+02	2.85E+02	3.86E+03	1.20E+03	1.92E+02	3.86E+03	7.32E+02	1.70E+02	3.86E+03	1.06E+03
3.87E+03	3.96E+02	2.00E+02	3.87E+03	6.95E+02	1.39E+02	3.87E+03	5.22E+02	2.19E+02	3.87E+03	2.86E+02	2.11E+02	3.87E+03	2.74E+02	8.00E+01	3.87E+03	8.98E+02	2.72E+02	3.87E+03	4.95E+02	1.04E+02	3.87E+03	3.26E+02	2.22E+01	3.87E+03	4.28E+02	1.79E+02	3.87E+03	3.73E+02	1.99E+02	3.87E+03	4.01E+02	1.17E+02	3.87E+03	6.28E+02	3.03E+02	3.87E+03	4.42E+02	1.25E+02	3.87E+03	6.36E+02	2.87E+02	3.87E+03	1.20E+03	1.91E+02	3.87E+03	7.34E+02	1.69E+02	3.87E+03	1.06E+03
3.89E+03	3.87E+02	1.99E+02	3.89E+03	6.98E+02	1.44E+02	3.89E+03	5.16E+02	2.17E+02	3.89E+03	2.86E+02	2.12E+02	3.89E+03	2.73E+02	8.32E+01	3.89E+03	8.92E+02	2.69E+02	3.89E+03	4.91E+02	1.06E+02	3.89E+03	3.23E+02	1.83E+01	3.89E+03	4.21E+02	1.78E+02	3.89E+03	3.66E+02	2.01E+02	3.89E+03	3.93E+02	1.18E+02	3.89E+03	6.22E+02	3.05E+02	3.89E+03	4.33E+02	1.28E+02	3.89E+03	6.32E+02	2.87E+02	3.89E+03	1.20E+03	1.91E+02	3.89E+03	7.38E+02	1.66E+02	3.89E+03	1.06E+03
3.90E+03	3.80E+02	1.99E+02	3.90E+03	6.97E+02	1.47E+02	3.90E+03	5.10E+02	2.15E+02	3.90E+03	2.80E+02	2.10E+02	3.90E+03	2.72E+02	8.60E+01	3.90E+03	8.89E+02	2.65E+02	3.90E+03	4.89E+02	1.04E+02	0.00E+00	0.00E+00	0.00E+00	3.90E+03	4.15E+02	1.77E+02	3.90E+03	3.59E+02	1.99E+02	3.90E+03	3.85E+02	1.21E+02	3.90E+03	6.20E+02	3.06E+02	3.90E+03	4.27E+02	1.31E+02	3.90E+03	6.28E+02	2.91E+02	3.90E+03	1.20E+03	1.91E+02	3.90E+03	7.43E+02	1.63E+02	3.90E+03	1.07E+03
3.92E+03	3.72E+02	1.97E+02	3.92E+03	6.98E+02	1.53E+02	3.92E+03	5.03E+02	2.13E+02	3.92E+03	2.73E+02	2.09E+02	3.92E+03	2.72E+02	8.80E+01	3.92E+03	8.85E+02	2.61E+02	3.92E+03	4.83E+02	1.07E+02	0.00E+00	0.00E+00	0.00E+00	3.92E+03	4.11E+02	1.77E+02	3.92E+03	3.48E+02	1.97E+02	3.92E+03	3.78E+02	1.26E+02	3.92E+03	6.15E+02	3.09E+02	3.92E+03	4.19E+02	1.32E+02	3.92E+03	6.25E+02	2.96E+02	3.92E+03	1.20E+03	1.91E+02	3.92E+03	7.46E+02	1.60E+02	3.92E+03	1.07E+03
3.93E+03	3.65E+02	1.98E+02	3.93E+03	7.02E+02	1.53E+02	3.93E+03	4.97E+02	2.13E+02	3.93E+03	2.68E+02	2.06E+02	3.93E+03	2.69E+02	8.79E+01	3.93E+03	8.80E+02	2.58E+02	3.93E+03	4.78E+02	1.15E+02	0.00E+00	0.00E+00	0.00E+00	3.93E+03	4.07E+02	1.77E+02	3.93E+03	3.40E+02	2.02E+02	3.93E+03	3.70E+02	1.32E+02	3.93E+03	6.09E+02	3.09E+02	3.93E+03	4.11E+02	1.32E+02	3.93E+03	6.23E+02	3.00E+02	3.93E+03	1.20E+03	1.91E+02	3.93E+03	7.48E+02	1.58E+02	3.93E+03	1.08E+03
3.95E+03	3.57E+02	2.00E+02	3.95E+03	7.05E+02	1.53E+02	3.95E+03	4.92E+02	2.12E+02	3.95E+03	2.65E+02	2.04E+02	3.95E+03	2.68E+02	9.19E+01	3.95E+03	8.75E+02	2.61E+02	3.95E+03	4.76E+02	1.21E+02	0.00E+00	0.00E+00	0.00E+00	3.95E+03	4.05E+02	1.78E+02	3.95E+03	3.29E+02	2.05E+02	3.95E+03	3.63E+02	1.30E+02	3.95E+03	6.03E+02	3.10E+02	3.95E+03	4.05E+02	1.34E+02	3.95E+03	6.20E+02	3.02E+02	3.95E+03	1.20E+03	1.90E+02	3.95E+03	7.50E+02	1.56E+02	3.95E+03	1.08E+03
3.96E+03	3.51E+02	2.00E+02	3.96E+03	7.10E+02	1.56E+02	3.96E+03	4.83E+02	2.15E+02	3.96E+03	2.63E+02	2.00E+02	3.96E+03	2.66E+02	9.41E+01	3.96E+03	8.71E+02	2.68E+02	3.96E+03	4.70E+02	1.25E+02	0.00E+00	0.00E+00	0.00E+00	3.96E+03	4.04E+02	1.77E+02	3.96E+03	3.20E+02	2.02E+02	3.96E+03	3.54E+02	1.30E+02	3.96E+03	5.97E+02	3.05E+02	3.96E+03	3.99E+02	1.36E+02	3.96E+03	6.20E+02	3.06E+02	3.96E+03	1.20E+03	1.91E+02	3.96E+03	7.50E+02	1.50E+02	3.96E+03	1.08E+03
3.98E+03	3.45E+02	1.99E+02	3.98E+03	7.14E+02	1.60E+02	3.98E+03	4.77E+02	2.18E+02	3.98E+03	2.62E+02	1.96E+02	3.98E+03	2.64E+02	9.80E+01	3.98E+03	8.67E+02	2.74E+02	3.98E+03	4.67E+02	1.32E+02	0.00E+00	0.00E+00	0.00E+00	3.98E+03	4.05E+02	1.75E+02	3.98E+03	3.13E+02	1.99E+02	3.98E+03	3.47E+02	1.32E+02	3.98E+03	5.95E+02	3.02E+02	3.98E+03	3.92E+02	1.37E+02	3.98E+03	6.22E+02	3.12E+02	3.98E+03	1.20E+03	1.90E+02	3.98E+03	7.53E+02	1.46E+02	3.98E+03	1.08E+03
3.99E+03	3.38E+02	2.03E+02	3.99E+03	7.14E+02	1.61E+02	3.99E+03	4.73E+02	2.18E+02	3.99E+03	2.59E+02	1.93E+02	3.99E+03	2.63E+02	9.93E+01	3.99E+03	8.63E+02	2.76E+02	3.99E+03	4.63E+02	1.36E+02	0.00E+00	0.00E+00	0.00E+00	3.99E+03	4.06E+02	1.70E+02	3.99E+03	3.06E+02	1.98E+02	3.99E+03	3.42E+02	1.33E+02	3.99E+03	5.91E+02	3.00E+02	3.99E+03	3.89E+02	1.40E+02	3.99E+03	6.18E+02	3.16E+02	3.99E+03	1.20E+03	1.90E+02	3.99E+03	7.53E+02	1.40E+02	3.99E+03	1.08E+03
4.01E+03	3.30E+02	2.05E+02	4.01E+03	7.13E+02	1.63E+02	4.01E+03	4.63E+02	2.23E+02	4.01E+03	2.58E+02	1.92E+02	4.01E+03	2.56E+02	1.02E+02	4.01E+03	8.59E+02	2.72E+02	4.01E+03	4.63E+02	1.41E+02	0.00E+00	0.00E+00	0.00E+00	4.01E+03	4.03E+02	1.73E+02	4.01E+03	3.00E+02	1.97E+02	4.01E+03	3.35E+02	1.32E+02	4.01E+03	5.85E+02	3.00E+02	4.01E+03	3.89E+02	1.45E+02	4.01E+03	6.12E+02	3.16E+02	4.01E+03	1.20E+03	1.91E+02	4.01E+03	7.53E+02	1.35E+02	4.01E+03	1.08E+03
4.02E+03	3.22E+02	2.06E+02	4.02E+03	7.12E+02	1.69E+02	4.02E+03	4.58E+02	2.23E+02	4.02E+03	2.55E+02	1.92E+02	4.02E+03	2.52E+02	1.02E+02	4.02E+03	8.53E+02	2.70E+02	4.02E+03	4.70E+02	1.47E+02	0.00E+00	0.00E+00	0.00E+00	4.02E+03	4.00E+02	1.69E+02	4.02E+03	2.90E+02	1.98E+02	4.02E+03	3.28E+02	1.29E+02	4.02E+03	5.81E+02	2.97E+02	4.02E+03	3.88E+02	1.46E+02	4.02E+03	6.10E+02	3.16E+02	4.02E+03	1.20E+03	1.90E+02	4.02E+03	7.54E+02	1.32E+02	4.02E+03	1.09E+03
4.04E+03	3.19E+02	2.12E+02	4.04E+03	7.08E+02	1.72E+02	4.04E+03	4.53E+02	2.25E+02	4.04E+03	2.52E+02	1.92E+02	4.04E+03	2.51E+02	1.04E+02	4.04E+03	8.46E+02	2.69E+02	4.04E+03	4.71E+02	1.48E+02	0.00E+00	0.00E+00	0.00E+00	4.04E+03	3.94E+02	1.71E+02	4.04E+03	2.84E+02	1.99E+02	4.04E+03	3.21E+02	1.28E+02	4.04E+03	5.74E+02	2.97E+02	4.04E+03	3.87E+02	1.48E+02	4.04E+03	6.07E+02	3.14E+02	4.04E+03	1.20E+03	1.90E+02	4.04E+03	7.50E+02	1.29E+02	4.04E+03	1.10E+03
4.07E+03	3.05E+02	2.08E+02	4.05E+03	7.07E+02	1.73E+02	4.05E+03	4.44E+02	2.24E+02	4.05E+03	2.48E+02	1.91E+02	4.05E+03	2.50E+02	1.08E+02	4.05E+03	8.42E+02	2.65E+02	4.05E+03	4.73E+02	1.46E+02	0.00E+00	0.00E+00	0.00E+00	4.05E+03	3.90E+02	1.75E+02	4.05E+03	2.77E+02	1.99E+02	4.05E+03	3.14E+02	1.26E+02	4.05E+03	5.68E+02	2.96E+02	4.05E+03	3.92E+02	1.54E+02	4.05E+03	6.02E+02	3.09E+02	4.05E+03	1.20E+03	1.89E+02	4.05E+03	7.48E+02	1.24E+02	4.05E+03	1.09E+03
0.00E+00	0.00E+00	0.00E+00	4.07E+03	7.04E+02	1.73E+02	4.07E+03	4.38E+02	2.23E+02	4.07E+03	2.44E+02	1.90E+02	4.07E+03	2.51E+02	1.13E+02	4.07E+03	8.36E+02	2.62E+02	4.07E+03	4.80E+02	1.50E+02	0.00E+00	0.00E+00	0.00E+00	4.07E+03	3.87E+02	1.76E+02	4.07E+03	2.71E+02	1.98E+02	4.07E+03	3.10E+02	1.22E+02	4.07E+03	5.64E+02	2.95E+02	4.07E+03	3.94E+02	1.60E+02	4.07E+03	5.98E+02	3.07E+02	4.07E+03	1.20E+03	1.89E+02	4.07E+03	7.47E+02	1.23E+02	4.07E+03	1.09E+03
0.00E+00	0.00E+00	0.00E+00	4.08E+03	7.03E+02	1.72E+02	4.08E+03	4.31E+02	2.28E+02	4.08E+03	2.38E+02	1.88E+02	4.08E+03	2.49E+02	1.20E+02	4.08E+03	8.31E+02	2.59E+02	4.08E+03	4.81E+02	1.51E+02	0.00E+00	0.00E+00	0.00E+00	4.08E+03	3.83E+02	1.77E+02	4.08E+03	2.63E+02	1.97E+02	4.08E+03	3.02E+02	1.20E+02	4.08E+03	5.64E+02	2.91E+02	4.08E+03	3.93E+02	1.65E+02	4.08E+03	5.90E+02	3.10E+02	4.08E+03	1.20E+03	1.89E+02	4.08E+03	7.45E+02	1.16E+02	4.08E+03	1.09E+03
0.00E+00	0.00E+00	0.00E+00	4.10E+03	6.98E+02	1.72E+02	4.10E+03	4.26E+02	2.33E+02	4.10E+03	2.33E+02	1.87E+02	4.10E+03	2.50E+02	1.24E+02	4.10E+03	8.29E+02	2.50E+02	4.10E+03	4.87E+02	1.51E+02	0.00E+00	0.00E+00	0.00E+00	4.10E+03	3.78E+02	1.76E+02	4.10E+03	2.57E+02	1.97E+02	4.10E+03	2.97E+02	1.19E+02	4.10E+03	5.63E+02	2.90E+02	4.10E+03	3.86E+02	1.70E+02	4.10E+03	5.85E+02	3.09E+02	4.10E+03	1.20E+03	1.89E+02	4.10E+03	7.37E+02	1.12E+02	4.10E+03	1.08E+03
0.00E+00	0.00E+00	0.00E+00	4.11E+03	6.99E+02	1.72E+02	4.11E+03	4.21E+02	2.36E+02	4.11E+03	2.28E+02	1.89E+02	4.11E+03	2.51E+02	1.28E+02	4.11E+03	8.32E+02	2.47E+02	4.11E+03	4.93E+02	1.54E+02	0.00E+00	0.00E+00	0.00E+00	4.11E+03	3.72E+02	1.75E+02	4.11E+03	2.52E+02	1.96E+02	4.11E+03	2.92E+02	1.15E+02	4.11E+03	5.66E+02	2.86E+02	4.11E+03	3.80E+02	1.73E+02	4.11E+03	5.83E+02	3.09E+02	4.11E+03	1.20E+03	1.90E+02	4.11E+03	7.35E+02	1.08E+02	4.11E+03	1.08E+03
0.00E+00	0.00E+00	0.00E+00	4.13E+03	6.99E+02	1.72E+02	4.13E+03	4.16E+02	2.38E+02	4.13E+03	2.24E+02	1.91E+02	4.13E+03	2.46E+02	1.31E+02	4.13E+03	8.34E+02	2.42E+02	4.13E+03	4.91E+02	1.59E+02	0.00E+00	0.00E+00	0.00E+00	4.13E+03	3.66E+02	1.73E+02	4.13E+03	2.46E+02	1.97E+02	4.13E+03	2.89E+02	1.10E+02	4.13E+03	5.66E+02	2.88E+02	4.13E+03	3.74E+02	1.73E+02	4.13E+03	5.79E+02	3.12E+02	4.13E+03	1.20E+03	1.91E+02	4.13E+03	7.34E+02	1.02E+02	4.13E+03	1.07E+03
0.00E+00	0.00E+00	0.00E+00	4.14E+03	6.99E+02	1.71E+02	4.14E+03	4.11E+02	2.45E+02	4.14E+03	2.22E+02	1.91E+02	4.14E+03	2.37E+02	1.33E+02	4.14E+03	8.37E+02	2.37E+02	4.14E+03	4.94E+02	1.66E+02	0.00E+00	0.00E+00	0.00E+00	4.14E+03	3.61E+02	1.70E+02	4.14E+03	2.37E+02	1.97E+02	4.14E+03	2.90E+02	1.02E+02	4.14E+03	5.66E+02	2.88E+02	4.14E+03	3.68E+02	1.70E+02	4.14E+03	5.77E+02	3.15E+02	4.14E+03	1.19E+03	1.91E+02	4.14E+03	7.38E+02	9.52E+01	4.14E+03	1.07E+03
0.00E+00	0.00E+00	0.00E+00	4.16E+03	6.99E+02	1.73E+02	4.16E+03	4.09E+02	2.44E+02	4.16E+03	2.20E+02	1.90E+02	4.16E+03	2.33E+02	1.32E+02	4.16E+03	8.44E+02	2.36E+02	4.16E+03	4.97E+02	1.75E+02	0.00E+00	0.00E+00	0.00E+00	4.16E+03	3.55E+02	1.69E+02	4.16E+03	2.33E+02	1.96E+02	4.16E+03	2.90E+02	9.63E+01	4.16E+03	5.66E+02	2.87E+02	4.16E+03	3.64E+02	1.67E+02	4.16E+03	5.74E+02	3.15E+02	4.16E+03	1.19E+03	1.90E+02	4.16E+03	7.41E+02	9.02E+01	4.16E+03	1.07E+03
0.00E+00	0.00E+00	0.00E+00	4.17E+03	6.99E+02	1.73E+02	4.17E+03	4.05E+02	2.48E+02	4.17E+03	2.17E+02	1.90E+02	4.17E+03	2.26E+02	1.36E+02	4.17E+03	8.52E+02	2.39E+02	4.17E+03	4.95E+02	1.82E+02	0.00E+00	0.00E+00	0.00E+00	4.17E+03	3.47E+02	1.69E+02	4.17E+03	2.30E+02	1.89E+02	4.17E+03	2.91E+02	9.50E+01	4.17E+03	5.66E+02	2.88E+02	4.17E+03	3.58E+02	1.66E+02	4.17E+03	5.69E+02	3.12E+02	4.17E+03	1.19E+03	1.90E+02	4.17E+03	7.43E+02	8.66E+01	4.17E+03	1.06E+03
0.00E+00	0.00E+00	0.00E+00	4.19E+03	6.98E+02	1.72E+02	4.19E+03	4.03E+02	2.51E+02	4.19E+03	2.13E+02	1.88E+02	4.19E+03	2.20E+02	1.38E+02	4.19E+03	8.59E+02	2.36E+02	4.19E+03	4.89E+02	1.88E+02	0.00E+00	0.00E+00	0.00E+00	4.19E+03	3.40E+02	1.67E+02	4.19E+03	2.27E+02	1.88E+02	4.19E+03	2.89E+02	9.53E+01	4.19E+03	5.64E+02	2.89E+02	4.19E+03	3.53E+02	1.66E+02	4.19E+03	5.69E+02	3.08E+02	4.19E+03	1.19E+03	1.90E+02	4.19E+03	7.45E+02	8.42E+01	4.19E+03	1.06E+03
0.00E+00	0.00E+00	0.00E+00	4.20E+03	6.98E+02	1.72E+02	4.20E+03	3.96E+02	2.52E+02	4.20E+03	2.10E+02	1.87E+02	4.20E+03	2.19E+02	1.38E+02	4.20E+03	8.65E+02	2.34E+02	4.20E+03	4.87E+02	1.94E+02	0.00E+00	0.00E+00	0.00E+00	4.20E+03	3.33E+02	1.66E+02	4.20E+03	2.23E+02	1.85E+02	4.20E+03	2.82E+02	9.57E+01	4.20E+03	5.61E+02	2.87E+02	4.20E+03	3.47E+02	1.65E+02	4.20E+03	5.66E+02	3.06E+02	4.20E+03	1.19E+03	1.90E+02	4.20E+03	7.48E+02	8.64E+01	4.20E+03	1.06E+03
0.00E+00	0.00E+00	0.00E+00	4.22E+03	6.98E+02	1.72E+02	4.22E+03	3.94E+02	2.58E+02	4.22E+03	2.09E+02	1.87E+02	4.22E+03	2.16E+02	1.38E+02	4.22E+03	8.69E+02	2.31E+02	4.22E+03	4.87E+02	2.00E+02	0.00E+00	0.00E+00	0.00E+00	4.22E+03	3.26E+02	1.63E+02	4.22E+03	2.18E+02	1.83E+02	4.22E+03	2.78E+02	9.63E+01	4.22E+03	5.58E+02	2.82E+02	4.22E+03	3.37E+02	1.59E+02	4.22E+03	5.63E+02	3.04E+02	4.22E+03	1.19E+03	1.90E+02	4.22E+03	7.49E+02	8.86E+01	4.22E+03	1.06E+03
0.00E+00	0.00E+00	0.00E+00	4.23E+03	6.98E+02	1.71E+02	4.23E+03	3.93E+02	2.63E+02	4.23E+03	2.04E+02	1.89E+02	4.23E+03	2.12E+02	1.41E+02	4.23E+03	8.69E+02	2.27E+02	4.23E+03	4.85E+02	2.04E+02	0.00E+00	0.00E+00	0.00E+00	4.23E+03	3.20E+02	1.62E+02	4.23E+03	2.14E+02	1.80E+02	4.23E+03	2.73E+02	9.88E+01	4.23E+03	5.60E+02	2.80E+02	4.23E+03	3.30E+02	1.57E+02	4.23E+03	5.58E+02	3.03E+02	4.23E+03	1.19E+03	1.91E+02	4.23E+03	7.49E+02	8.88E+01	4.23E+03	1.05E+03
0.00E+00	0.00E+00	0.00E+00	4.25E+03	6.98E+02	1.71E+02	4.25E+03	3.85E+02	2.70E+02	4.25E+03	1.97E+02	1.88E+02	4.25E+03	2.03E+02	1.40E+02	4.25E+03	8.70E+02	2.19E+02	4.25E+03	4.81E+02	2.08E+02	0.00E+00	0.00E+00	0.00E+00	4.25E+03	3.14E+02	1.60E+02	4.25E+03	2.10E+02	1.81E+02	4.25E+03	2.69E+02	1.03E+02	4.25E+03	5.62E+02	2.80E+02	4.25E+03	3.21E+02	1.51E+02	4.25E+03	5.55E+02	3.05E+02	4.25E+03	1.19E+03	1.95E+02	4.25E+03	7.51E+02	9.03E+01	4.25E+03	1.06E+03
0.00E+00	0.00E+00	0.00E+00	4.26E+03	6.98E+02	1.71E+02	4.26E+03	3.81E+02	2.75E+02	4.26E+03	1.89E+02	1.87E+02	4.26E+03	1.97E+02	1.39E+02	4.26E+03	8.66E+02	2.12E+02	4.26E+03	4.77E+02	2.15E+02	0.00E+00	0.00E+00	0.00E+00	4.26E+03	3.05E+02	1.63E+02	4.26E+03	2.03E+02	1.84E+02	4.26E+03	2.67E+02	1.04E+02	4.26E+03	5.62E+02	2.75E+02	4.26E+03	3.15E+02	1.49E+02	4.26E+03	5.46E+02	3.06E+02	4.26E+03	1.19E+03	2.00E+02	4.26E+03	7.51E+02	9.35E+01	4.26E+03	1.06E+03
0.00E+00	0.00E+00	0.00E+00	4.28E+03	6.98E+02	1.71E+02	4.28E+03	3.73E+02	2.77E+02	4.28E+03	1.80E+02	1.87E+02	4.28E+03	1.91E+02	1.38E+02	4.28E+03	8.66E+02	2.07E+02	4.28E+03	4.76E+02	2.19E+02	0.00E+00	0.00E+00	0.00E+00	4.28E+03	3.01E+02	1.65E+02	4.28E+03	1.97E+02	1.84E+02	4.28E+03	2.63E+02	1.06E+02	4.28E+03	5.60E+02	2.71E+02	4.28E+03	3.08E+02	1.48E+02	4.28E+03	5.41E+02	3.04E+02	4.28E+03	1.20E+03	2.04E+02	4.28E+03	7.53E+02	9.54E+01	4.28E+03	1.05E+03
0.00E+00	0.00E+00	0.00E+00	4.29E+03	6.98E+02	1.71E+02	4.29E+03	3.70E+02	2.76E+02	4.29E+03	1.80E+02	1.84E+02	4.29E+03	1.85E+02	1.39E+02	4.29E+03	8.64E+02	2.04E+02	4.29E+03	4.72E+02	2.25E+02	0.00E+00	0.00E+00	0.00E+00	4.29E+03	2.97E+02	1.68E+02	4.29E+03	1.88E+02	1.83E+02	4.29E+03	2.59E+02	1.06E+02	4.29E+03	5.65E+02	2.71E+02	4.29E+03	3.00E+02	1.51E+02	4.29E+03	5.40E+02	3.01E+02	4.29E+03	1.20E+03	2.07E+02	4.29E+03	7.57E+02	9.57E+01	4.29E+03	1.05E+03
0.00E+00	0.00E+00	0.00E+00	4.31E+03	6.97E+02	1.73E+02	4.31E+03	3.67E+02	2.73E+02	4.31E+03	1.80E+02	1.81E+02	4.31E+03	1.78E+02	1.39E+02	4.31E+03	8.62E+02	2.00E+02	4.31E+03	4.67E+02	2.28E+02	0.00E+00	0.00E+00	0.00E+00	4.31E+03	2.89E+02	1.73E+02	0.00E+00	0.00E+00	0.00E+00	4.31E+03	2.54E+02	1.04E+02	4.31E+03	5.67E+02	2.70E+02	4.31E+03	2.94E+02	1.53E+02	4.31E+03	5.38E+02	2.95E+02	4.31E+03	1.20E+03	2.09E+02	4.31E+03	7.61E+02	9.45E+01	4.31E+03	1.06E+03
0.00E+00	0.00E+00	0.00E+00	4.32E+03	6.97E+02	1.76E+02	4.32E+03	3.66E+02	2.70E+02	4.32E+03	1.72E+02	1.81E+02	4.32E+03	1.69E+02	1.37E+02	4.32E+03	8.60E+02	1.96E+02	4.32E+03	4.62E+02	2.29E+02	0.00E+00	0.00E+00	0.00E+00	4.32E+03	2.86E+02	1.76E+02	0.00E+00	0.00E+00	0.00E+00	4.32E+03	2.47E+02	1.03E+02	4.32E+03	5.68E+02	2.68E+02	4.32E+03	2.90E+02	1.58E+02	4.32E+03	5.39E+02	2.88E+02	4.32E+03	1.20E+03	2.09E+02	4.32E+03	7.66E+02	8.83E+01	4.32E+03	1.06E+03
0.00E+00	0.00E+00	0.00E+00	4.34E+03	6.95E+02	1.81E+02	4.34E+03	3.66E+02	2.68E+02	4.34E+03	1.62E+02	1.84E+02	4.34E+03	1.63E+02	1.34E+02	4.34E+03	8.58E+02	1.92E+02	4.34E+03	4.60E+02	2.30E+02	0.00E+00	0.00E+00	0.00E+00	4.34E+03	2.81E+02	1.77E+02	0.00E+00	0.00E+00	0.00E+00	4.34E+03	2.44E+02	1.06E+02	4.34E+03	5.68E+02	2.67E+02	4.34E+03	2.86E+02	1.62E+02	4.34E+03	5.38E+02	2.84E+02	4.34E+03	1.21E+03	2.08E+02	4.34E+03	7.72E+02	8.78E+01	4.34E+03	1.06E+03
0.00E+00	0.00E+00	0.00E+00	4.35E+03	6.94E+02	1.86E+02	4.35E+03	3.59E+02	2.66E+02	4.35E+03	1.54E+02	1.85E+02	4.35E+03	1.56E+02	1.33E+02	4.35E+03	8.58E+02	1.90E+02	4.35E+03	4.58E+02	2.33E+02	0.00E+00	0.00E+00	0.00E+00	4.35E+03	2.83E+02	1.76E+02	0.00E+00	0.00E+00	0.00E+00	4.35E+03	2.37E+02	1.11E+02	4.35E+03	5.67E+02	2.67E+02	4.35E+03	2.85E+02	1.65E+02	4.35E+03	5.40E+02	2.81E+02	4.37E+03	1.22E+03	2.13E+02	4.35E+03	7.78E+02	9.18E+01	4.35E+03	1.06E+03
0.00E+00	0.00E+00	0.00E+00	4.37E+03	6.91E+02	1.91E+02	4.37E+03	3.59E+02	2.67E+02	4.37E+03	1.45E+02	1.84E+02	4.37E+03	1.50E+02	1.33E+02	4.37E+03	8.56E+02	1.93E+02	4.37E+03	4.59E+02	2.42E+02	0.00E+00	0.00E+00	0.00E+00	4.37E+03	2.84E+02	1.75E+02	0.00E+00	0.00E+00	0.00E+00	4.37E+03	2.31E+02	1.10E+02	4.37E+03	5.66E+02	2.65E+02	0.00E+00	0.00E+00	0.00E+00	4.37E+03	5.42E+02	2.76E+02	0.00E+00	0.00E+00	0.00E+00	4.37E+03	7.81E+02	9.47E+01	4.37E+03	1.06E+03
0.00E+00	0.00E+00	0.00E+00	4.38E+03	6.90E+02	1.94E+02	4.38E+03	3.55E+02	2.73E+02	4.38E+03	1.40E+02	1.82E+02	4.38E+03	1.45E+02	1.34E+02	4.38E+03	8.50E+02	1.97E+02	4.38E+03	4.61E+02	2.49E+02	0.00E+00	0.00E+00	0.00E+00	4.38E+03	2.82E+02	1.79E+02	0.00E+00	0.00E+00	0.00E+00	4.38E+03	2.29E+02	1.05E+02	4.38E+03	5.68E+02	2.67E+02	0.00E+00	0.00E+00	0.00E+00	4.38E+03	5.42E+02	2.69E+02	0.00E+00	0.00E+00	0.00E+00	4.38E+03	7.81E+02	9.68E+01	4.38E+03	1.06E+03
0.00E+00	0.00E+00	0.00E+00	4.40E+03	6.90E+02	2.00E+02	4.40E+03	3.51E+02	2.75E+02	4.40E+03	1.34E+02	1.82E+02	4.40E+03	1.39E+02	1.33E+02	4.40E+03	8.45E+02	2.00E+02	4.40E+03	4.62E+02	2.52E+02	0.00E+00	0.00E+00	0.00E+00	4.40E+03	2.76E+02	1.81E+02	0.00E+00	0.00E+00	0.00E+00	4.40E+03	2.25E+02	1.01E+02	4.40E+03	5.70E+02	2.67E+02	0.00E+00	0.00E+00	0.00E+00	4.40E+03	5.40E+02	2.65E+02	0.00E+00	0.00E+00	0.00E+00	4.40E+03	7.78E+02	9.96E+01	4.40E+03	1.06E+03
0.00E+00	0.00E+00	0.00E+00	4.41E+03	6.92E+02	2.06E+02	4.41E+03	3.49E+02	2.76E+02	4.41E+03	1.25E+02	1.81E+02	4.41E+03	1.32E+02	1.33E+02	4.41E+03	8.38E+02	2.02E+02	4.41E+03	4.60E+02	2.57E+02	0.00E+00	0.00E+00	0.00E+00	4.41E+03	2.71E+02	1.82E+02	0.00E+00	0.00E+00	0.00E+00	4.41E+03	2.19E+02	9.65E+01	4.41E+03	5.71E+02	2.67E+02	0.00E+00	0.00E+00	0.00E+00	4.41E+03	5.33E+02	2.63E+02	0.00E+00	0.00E+00	0.00E+00	4.41E+03	7.78E+02	1.02E+02	4.41E+03	1.06E+03
0.00E+00	0.00E+00	0.00E+00	4.43E+03	6.93E+02	2.08E+02	4.43E+03	3.44E+02	2.79E+02	4.43E+03	1.20E+02	1.80E+02	4.43E+03	1.27E+02	1.33E+02	4.43E+03	8.32E+02	2.05E+02	4.43E+03	4.57E+02	2.61E+02	0.00E+00	0.00E+00	0.00E+00	4.43E+03	2.68E+02	1.81E+02	0.00E+00	0.00E+00	0.00E+00	4.43E+03	2.16E+02	9.19E+01	4.43E+03	5.72E+02	2.68E+02	0.00E+00	0.00E+00	0.00E+00	4.43E+03	5.27E+02	2.62E+02	0.00E+00	0.00E+00	0.00E+00	4.43E+03	7.78E+02	1.08E+02	4.43E+03	1.06E+03
0.00E+00	0.00E+00	0.00E+00	4.44E+03	6.92E+02	2.10E+02	4.44E+03	3.43E+02	2.77E+02	4.44E+03	1.15E+02	1.81E+02	4.44E+03	1.22E+02	1.31E+02	4.44E+03	8.31E+02	2.14E+02	4.44E+03	4.57E+02	2.66E+02	0.00E+00	0.00E+00	0.00E+00	4.44E+03	2.64E+02	1.79E+02	0.00E+00	0.00E+00	0.00E+00	4.44E+03	2.14E+02	8.62E+01	4.44E+03	5.71E+02	2.68E+02	0.00E+00	0.00E+00	0.00E+00	4.44E+03	5.26E+02	2.62E+02	0.00E+00	0.00E+00	0.00E+00	4.44E+03	7.76E+02	1.13E+02	4.44E+03	1.06E+03
0.00E+00	0.00E+00	0.00E+00	4.46E+03	6.93E+02	2.09E+02	4.46E+03	3.46E+02	2.78E+02	4.46E+03	1.09E+02	1.82E+02	4.46E+03	1.15E+02	1.31E+02	4.46E+03	8.39E+02	2.19E+02	4.46E+03	4.54E+02	2.72E+02	0.00E+00	0.00E+00	0.00E+00	4.46E+03	2.60E+02	1.77E+02	0.00E+00	0.00E+00	0.00E+00	4.46E+03	2.16E+02	8.12E+01	4.46E+03	5.72E+02	2.67E+02	0.00E+00	0.00E+00	0.00E+00	4.46E+03	5.26E+02	2.68E+02	0.00E+00	0.00E+00	0.00E+00	4.46E+03	7.73E+02	1.14E+02	4.46E+03	1.06E+03
0.00E+00	0.00E+00	0.00E+00	4.47E+03	6.92E+02	2.09E+02	4.47E+03	3.52E+02	2.76E+02	4.47E+03	1.01E+02	1.84E+02	4.47E+03	1.07E+02	1.35E+02	4.47E+03	8.40E+02	2.25E+02	4.47E+03	4.52E+02	2.77E+02	0.00E+00	0.00E+00	0.00E+00	4.47E+03	2.56E+02	1.75E+02	0.00E+00	0.00E+00	0.00E+00	4.47E+03	2.16E+02	7.52E+01	4.47E+03	5.71E+02	2.68E+02	0.00E+00	0.00E+00	0.00E+00	4.47E+03	5.23E+02	2.73E+02	0.00E+00	0.00E+00	0.00E+00	4.47E+03	7.72E+02	1.18E+02	4.47E+03	1.06E+03
0.00E+00	0.00E+00	0.00E+00	4.49E+03	6.93E+02	2.09E+02	4.49E+03	3.54E+02	2.74E+02	4.49E+03	9.29E+01	1.85E+02	4.49E+03	1.01E+02	1.40E+02	4.49E+03	8.40E+02	2.27E+02	4.49E+03	4.52E+02	2.85E+02	0.00E+00	0.00E+00	0.00E+00	4.49E+03	2.52E+02	1.74E+02	0.00E+00	0.00E+00	0.00E+00	4.49E+03	2.16E+02	7.08E+01	4.49E+03	5.71E+02	2.69E+02	0.00E+00	0.00E+00	0.00E+00	4.49E+03	5.19E+02	2.74E+02	0.00E+00	0.00E+00	0.00E+00	4.49E+03	7.69E+02	1.21E+02	4.49E+03	1.06E+03
0.00E+00	0.00E+00	0.00E+00	4.50E+03	6.92E+02	2.10E+02	4.50E+03	3.56E+02	2.71E+02	4.50E+03	8.41E+01	1.86E+02	4.50E+03	9.55E+01	1.41E+02	4.50E+03	8.36E+02	2.32E+02	4.50E+03	4.56E+02	2.91E+02	0.00E+00	0.00E+00	0.00E+00	4.50E+03	2.49E+02	1.73E+02	0.00E+00	0.00E+00	0.00E+00	4.50E+03	2.14E+02	6.56E+01	4.50E+03	5.68E+02	2.69E+02	0.00E+00	0.00E+00	0.00E+00	4.50E+03	5.13E+02	2.74E+02	0.00E+00	0.00E+00	0.00E+00	4.50E+03	7.63E+02	1.21E+02	4.50E+03	1.06E+03
0.00E+00	0.00E+00	0.00E+00	4.52E+03	6.90E+02	2.18E+02	4.52E+03	3.58E+02	2.67E+02	4.52E+03	7.68E+01	1.86E+02	4.52E+03	9.13E+01	1.42E+02	4.52E+03	8.31E+02	2.35E+02	4.52E+03	4.59E+02	2.94E+02	0.00E+00	0.00E+00	0.00E+00	4.52E+03	2.45E+02	1.70E+02	0.00E+00	0.00E+00	0.00E+00	4.52E+03	2.10E+02	6.05E+01	4.52E+03	5.70E+02	2.72E+02	0.00E+00	0.00E+00	0.00E+00	4.52E+03	5.07E+02	2.75E+02	0.00E+00	0.00E+00	0.00E+00	4.52E+03	7.57E+02	1.19E+02	4.52E+03	1.05E+03
0.00E+00	0.00E+00	0.00E+00	4.53E+03	6.90E+02	2.23E+02	4.53E+03	3.59E+02	2.63E+02	4.53E+03	7.08E+01	1.85E+02	4.53E+03	8.64E+01	1.43E+02	4.53E+03	8.30E+02	2.41E+02	4.53E+03	4.60E+02	2.95E+02	0.00E+00	0.00E+00	0.00E+00	4.53E+03	2.39E+02	1.65E+02	0.00E+00	0.00E+00	0.00E+00	4.53E+03	2.05E+02	5.52E+01	4.53E+03	5.75E+02	2.70E+02	0.00E+00	0.00E+00	0.00E+00	4.53E+03	5.02E+02	2.75E+02	0.00E+00	0.00E+00	0.00E+00	4.53E+03	7.51E+02	1.18E+02	4.53E+03	1.05E+03
0.00E+00	0.00E+00	0.00E+00	4.55E+03	6.94E+02	2.25E+02	4.55E+03	3.58E+02	2.60E+02	4.55E+03	6.42E+01	1.83E+02	4.55E+03	8.14E+01	1.44E+02	4.55E+03	8.29E+02	2.47E+02	4.55E+03	4.59E+02	2.94E+02	0.00E+00	0.00E+00	0.00E+00	4.55E+03	2.37E+02	1.60E+02	0.00E+00	0.00E+00	0.00E+00	4.55E+03	2.04E+02	4.89E+01	4.55E+03	5.75E+02	2.69E+02	0.00E+00	0.00E+00	0.00E+00	4.55E+03	4.99E+02	2.74E+02	0.00E+00	0.00E+00	0.00E+00	4.55E+03	7.48E+02	1.16E+02	4.55E+03	1.04E+03
0.00E+00	0.00E+00	0.00E+00	4.56E+03	6.95E+02	2.24E+02	4.56E+03	3.59E+02	2.62E+02	4.56E+03	5.89E+01	1.80E+02	4.56E+03	7.65E+01	1.44E+02	4.56E+03	8.26E+02	2.52E+02	4.56E+03	4.60E+02	2.94E+02	0.00E+00	0.00E+00	0.00E+00	4.56E+03	2.34E+02	1.56E+02	0.00E+00	0.00E+00	0.00E+00	4.56E+03	2.04E+02	4.53E+01	4.56E+03	5.76E+02	2.69E+02	0.00E+00	0.00E+00	0.00E+00	4.56E+03	4.97E+02	2.71E+02	0.00E+00	0.00E+00	0.00E+00	4.56E+03	7.46E+02	1.12E+02	4.56E+03	1.04E+03
0.00E+00	0.00E+00	0.00E+00	4.58E+03	6.94E+02	2.24E+02	4.58E+03	3.65E+02	2.70E+02	4.58E+03	5.50E+01	1.79E+02	4.58E+03	7.01E+01	1.43E+02	4.58E+03	8.20E+02	2.52E+02	4.58E+03	4.63E+02	2.97E+02	0.00E+00	0.00E+00	0.00E+00	4.58E+03	2.31E+02	1.51E+02	0.00E+00	0.00E+00	0.00E+00	4.58E+03	2.03E+02	3.78E+01	4.58E+03	5.76E+02	2.69E+02	0.00E+00	0.00E+00	0.00E+00	4.58E+03	4.97E+02	2.69E+02	0.00E+00	0.00E+00	0.00E+00	4.58E+03	7.47E+02	1.06E+02	4.58E+03	1.04E+03
0.00E+00	0.00E+00	0.00E+00	4.59E+03	6.92E+02	2.25E+02	4.59E+03	3.70E+02	2.77E+02	4.59E+03	5.04E+01	1.81E+02	4.59E+03	6.50E+01	1.42E+02	4.59E+03	8.18E+02	2.57E+02	4.59E+03	4.61E+02	2.99E+02	0.00E+00	0.00E+00	0.00E+00	4.59E+03	2.37E+02	1.42E+02	0.00E+00	0.00E+00	0.00E+00	4.59E+03	2.03E+02	3.33E+01	4.59E+03	5.76E+02	2.66E+02	0.00E+00	0.00E+00	0.00E+00	4.59E+03	4.99E+02	2.67E+02	0.00E+00	0.00E+00	0.00E+00	4.59E+03	7.48E+02	9.77E+01	4.59E+03	1.04E+03
0.00E+00	0.00E+00	0.00E+00	4.61E+03	6.92E+02	2.25E+02	4.61E+03	3.81E+02	2.80E+02	4.61E+03	4.41E+01	1.81E+02	4.61E+03	5.95E+01	1.44E+02	4.61E+03	8.17E+02	2.60E+02	4.61E+03	4.61E+02	2.98E+02	0.00E+00	0.00E+00	0.00E+00	4.61E+03	2.35E+02	1.37E+02	0.00E+00	0.00E+00	0.00E+00	4.61E+03	2.03E+02	2.74E+01	4.61E+03	5.75E+02	2.65E+02	0.00E+00	0.00E+00	0.00E+00	4.61E+03	5.03E+02	2.62E+02	0.00E+00	0.00E+00	0.00E+00	4.61E+03	7.45E+02	9.22E+01	4.61E+03	1.04E+03
0.00E+00	0.00E+00	0.00E+00	4.62E+03	6.92E+02	2.24E+02	4.62E+03	3.84E+02	2.84E+02	4.62E+03	3.80E+01	1.78E+02	4.62E+03	5.36E+01	1.45E+02	4.62E+03	8.18E+02	2.63E+02	4.62E+03	4.61E+02	2.98E+02	0.00E+00	0.00E+00	0.00E+00	4.62E+03	2.33E+02	1.36E+02	0.00E+00	0.00E+00	0.00E+00	4.62E+03	2.06E+02	2.09E+01	4.62E+03	5.75E+02	2.65E+02	0.00E+00	0.00E+00	0.00E+00	4.62E+03	5.09E+02	2.62E+02	0.00E+00	0.00E+00	0.00E+00	4.62E+03	7.40E+02	8.38E+01	4.62E+03	1.04E+03
0.00E+00	0.00E+00	0.00E+00	4.64E+03	6.91E+02	2.25E+02	4.64E+03	3.83E+02	2.82E+02	4.64E+03	3.28E+01	1.78E+02	4.64E+03	4.96E+01	1.46E+02	4.64E+03	8.19E+02	2.64E+02	4.64E+03	4.61E+02	2.97E+02	0.00E+00	0.00E+00	0.00E+00	4.64E+03	2.26E+02	1.38E+02	0.00E+00	0.00E+00	0.00E+00	4.64E+03	2.06E+02	1.64E+01	4.64E+03	5.77E+02	2.63E+02	0.00E+00	0.00E+00	0.00E+00	4.64E+03	5.14E+02	2.68E+02	0.00E+00	0.00E+00	0.00E+00	4.64E+03	7.39E+02	7.76E+01	4.64E+03	1.03E+03
0.00E+00	0.00E+00	0.00E+00	4.65E+03	6.91E+02	2.25E+02	4.65E+03	3.82E+02	2.81E+02	4.65E+03	2.87E+01	1.79E+02	4.65E+03	4.39E+01	1.46E+02	4.65E+03	8.18E+02	2.67E+02	4.65E+03	4.61E+02	2.96E+02	0.00E+00	0.00E+00	0.00E+00	4.65E+03	2.22E+02	1.45E+02	0.00E+00	0.00E+00	0.00E+00	4.65E+03	2.03E+02	1.62E+01	4.65E+03	5.81E+02	2.63E+02	0.00E+00	0.00E+00	0.00E+00	4.65E+03	5.22E+02	2.66E+02	0.00E+00	0.00E+00	0.00E+00	4.65E+03	7.41E+02	7.54E+01	4.65E+03	1.03E+03
0.00E+00	0.00E+00	0.00E+00	4.67E+03	6.91E+02	2.25E+02	4.67E+03	3.80E+02	2.82E+02	4.67E+03	2.34E+01	1.78E+02	4.67E+03	3.89E+01	1.43E+02	4.67E+03	8.18E+02	2.69E+02	4.67E+03	4.62E+02	2.93E+02	0.00E+00	0.00E+00	0.00E+00	4.67E+03	2.18E+02	1.50E+02	0.00E+00	0.00E+00	0.00E+00	4.67E+03	2.02E+02	1.72E+01	4.67E+03	5.82E+02	2.64E+02	0.00E+00	0.00E+00	0.00E+00	4.67E+03	5.27E+02	2.65E+02	0.00E+00	0.00E+00	0.00E+00	4.67E+03	7.43E+02	7.41E+01	4.67E+03	1.03E+03
0.00E+00	0.00E+00	0.00E+00	4.68E+03	6.91E+02	2.25E+02	4.68E+03	3.80E+02	2.82E+02	4.68E+03	1.85E+01	1.75E+02	4.68E+03	3.34E+01	1.41E+02	4.68E+03	8.18E+02	2.71E+02	4.68E+03	4.61E+02	2.93E+02	0.00E+00	0.00E+00	0.00E+00	4.68E+03	2.12E+02	1.53E+02	0.00E+00	0.00E+00	0.00E+00	4.68E+03	2.02E+02	1.73E+01	4.68E+03	5.84E+02	2.65E+02	0.00E+00	0.00E+00	0.00E+00	4.68E+03	5.30E+02	2.64E+02	0.00E+00	0.00E+00	0.00E+00	4.68E+03	7.45E+02	7.74E+01	4.68E+03	1.03E+03
0.00E+00	0.00E+00	0.00E+00	4.70E+03	6.91E+02	2.24E+02	4.70E+03	3.76E+02	2.83E+02	4.70E+03	1.33E+01	1.75E+02	4.70E+03	2.79E+01	1.42E+02	4.70E+03	8.18E+02	2.75E+02	4.70E+03	4.61E+02	2.93E+02	0.00E+00	0.00E+00	0.00E+00	4.70E+03	2.07E+02	1.50E+02	0.00E+00	0.00E+00	0.00E+00	4.70E+03	2.03E+02	1.45E+01	4.70E+03	5.85E+02	2.65E+02	0.00E+00	0.00E+00	0.00E+00	4.70E+03	5.29E+02	2.62E+02	0.00E+00	0.00E+00	0.00E+00	4.70E+03	7.45E+02	7.83E+01	4.70E+03	1.03E+03
0.00E+00	0.00E+00	0.00E+00	4.71E+03	6.91E+02	2.24E+02	4.71E+03	3.75E+02	2.82E+02	4.71E+03	6.65E+00	1.76E+02	4.71E+03	2.11E+01	1.46E+02	4.71E+03	8.15E+02	2.80E+02	4.71E+03	4.62E+02	2.93E+02	0.00E+00	0.00E+00	0.00E+00	4.71E+03	2.00E+02	1.51E+02	0.00E+00	0.00E+00	0.00E+00	4.71E+03	2.00E+02	1.24E+01	4.71E+03	5.84E+02	2.65E+02	0.00E+00	0.00E+00	0.00E+00	4.71E+03	5.30E+02	2.57E+02	0.00E+00	0.00E+00	0.00E+00	4.71E+03	7.48E+02	8.47E+01	4.71E+03	1.03E+03
0.00E+00	0.00E+00	0.00E+00	4.73E+03	6.91E+02	2.24E+02	4.73E+03	3.74E+02	2.81E+02	4.73E+03	5.29E-01	1.74E+02	4.73E+03	1.40E+01	1.47E+02	4.73E+03	8.10E+02	2.82E+02	4.73E+03	4.62E+02	2.93E+02	0.00E+00	0.00E+00	0.00E+00	4.73E+03	1.93E+02	1.55E+02	0.00E+00	0.00E+00	0.00E+00	4.73E+03	1.97E+02	1.24E+01	4.73E+03	5.84E+02	2.65E+02	0.00E+00	0.00E+00	0.00E+00	4.73E+03	5.27E+02	2.52E+02	0.00E+00	0.00E+00	0.00E+00	4.73E+03	7.49E+02	8.88E+01	4.73E+03	1.03E+03
0.00E+00	0.00E+00	0.00E+00	4.74E+03	6.91E+02	2.24E+02	4.74E+03	3.75E+02	2.80E+02	0.00E+00	0.00E+00	0.00E+00	4.74E+03	7.25E+00	1.48E+02	4.74E+03	8.08E+02	2.84E+02	4.74E+03	4.62E+02	2.93E+02	0.00E+00	0.00E+00	0.00E+00	4.74E+03	1.87E+02	1.52E+02	0.00E+00	0.00E+00	0.00E+00	4.74E+03	1.97E+02	1.40E+01	4.74E+03	5.83E+02	2.64E+02	0.00E+00	0.00E+00	0.00E+00	4.74E+03	5.24E+02	2.46E+02	0.00E+00	0.00E+00	0.00E+00	4.74E+03	7.52E+02	9.28E+01	4.74E+03	1.03E+03
0.00E+00	0.00E+00	0.00E+00	4.76E+03	6.91E+02	2.24E+02	4.76E+03	3.77E+02	2.80E+02	0.00E+00	0.00E+00	0.00E+00	4.76E+03	1.82E+00	1.49E+02	4.76E+03	8.04E+02	2.85E+02	4.76E+03	4.62E+02	2.93E+02	0.00E+00	0.00E+00	0.00E+00	4.76E+03	1.82E+02	1.52E+02	0.00E+00	0.00E+00	0.00E+00	4.76E+03	1.97E+02	1.38E+01	4.76E+03	5.83E+02	2.64E+02	0.00E+00	0.00E+00	0.00E+00	4.76E+03	5.19E+02	2.43E+02	0.00E+00	0.00E+00	0.00E+00	4.76E+03	7.56E+02	9.58E+01	4.76E+03	1.04E+03
0.00E+00	0.00E+00	0.00E+00	4.77E+03	6.91E+02	2.24E+02	4.77E+03	3.78E+02	2.80E+02	0.00E+00	0.00E+00	0.00E+00	0.00E+00	0.00E+00	0.00E+00	4.77E+03	7.97E+02	2.86E+02	4.77E+03	4.62E+02	2.93E+02	0.00E+00	0.00E+00	0.00E+00	4.77E+03	1.78E+02	1.54E+02	0.00E+00	0.00E+00	0.00E+00	4.77E+03	1.97E+02	1.37E+01	4.77E+03	5.87E+02	2.62E+02	0.00E+00	0.00E+00	0.00E+00	4.77E+03	5.15E+02	2.42E+02	0.00E+00	0.00E+00	0.00E+00	4.77E+03	7.61E+02	9.80E+01	4.77E+03	1.04E+03
0.00E+00	0.00E+00	0.00E+00	4.79E+03	6.91E+02	2.24E+02	4.79E+03	3.75E+02	2.80E+02	0.00E+00	0.00E+00	0.00E+00	0.00E+00	0.00E+00	0.00E+00	4.79E+03	7.93E+02	2.85E+02	4.79E+03	4.62E+02	2.93E+02	0.00E+00	0.00E+00	0.00E+00	4.79E+03	1.75E+02	1.55E+02	0.00E+00	0.00E+00	0.00E+00	4.79E+03	1.97E+02	1.34E+01	4.79E+03	5.86E+02	2.62E+02	0.00E+00	0.00E+00	0.00E+00	4.79E+03	5.14E+02	2.45E+02	0.00E+00	0.00E+00	0.00E+00	4.79E+03	7.66E+02	9.81E+01	4.79E+03	1.05E+03
0.00E+00	0.00E+00	0.00E+00	4.80E+03	6.91E+02	2.24E+02	4.80E+03	3.71E+02	2.83E+02	0.00E+00	0.00E+00	0.00E+00	0.00E+00	0.00E+00	0.00E+00	4.80E+03	7.92E+02	2.85E+02	4.80E+03	4.62E+02	2.93E+02	0.00E+00	0.00E+00	0.00E+00	4.80E+03	1.71E+02	1.57E+02	0.00E+00	0.00E+00	0.00E+00	4.80E+03	1.97E+02	1.33E+01	4.80E+03	5.87E+02	2.62E+02	0.00E+00	0.00E+00	0.00E+00	4.80E+03	5.16E+02	2.51E+02	0.00E+00	0.00E+00	0.00E+00	4.80E+03	7.71E+02	9.87E+01	4.80E+03	1.05E+03
0.00E+00	0.00E+00	0.00E+00	4.82E+03	6.91E+02	2.23E+02	4.82E+03	3.69E+02	2.84E+02	0.00E+00	0.00E+00	0.00E+00	0.00E+00	0.00E+00	0.00E+00	4.82E+03	7.90E+02	2.84E+02	4.82E+03	4.62E+02	2.93E+02	0.00E+00	0.00E+00	0.00E+00	4.82E+03	1.64E+02	1.60E+02	0.00E+00	0.00E+00	0.00E+00	4.82E+03	1.97E+02	1.32E+01	4.82E+03	5.91E+02	2.57E+02	0.00E+00	0.00E+00	0.00E+00	4.82E+03	5.12E+02	2.54E+02	0.00E+00	0.00E+00	0.00E+00	4.82E+03	7.77E+02	9.98E+01	4.82E+03	1.05E+03
0.00E+00	0.00E+00	0.00E+00	4.83E+03	6.91E+02	2.23E+02	4.83E+03	3.68E+02	2.86E+02	0.00E+00	0.00E+00	0.00E+00	0.00E+00	0.00E+00	0.00E+00	4.83E+03	7.86E+02	2.85E+02	4.83E+03	4.62E+02	2.93E+02	0.00E+00	0.00E+00	0.00E+00	4.83E+03	1.60E+02	1.65E+02	0.00E+00	0.00E+00	0.00E+00	4.83E+03	1.97E+02	1.32E+01	4.83E+03	5.90E+02	2.51E+02	0.00E+00	0.00E+00	0.00E+00	4.83E+03	5.09E+02	2.56E+02	0.00E+00	0.00E+00	0.00E+00	4.83E+03	7.81E+02	1.04E+02	4.83E+03	1.05E+03
0.00E+00	0.00E+00	0.00E+00	4.85E+03	6.93E+02	2.23E+02	4.85E+03	3.69E+02	2.89E+02	0.00E+00	0.00E+00	0.00E+00	0.00E+00	0.00E+00	0.00E+00	4.85E+03	7.79E+02	2.88E+02	4.85E+03	4.62E+02	2.93E+02	0.00E+00	0.00E+00	0.00E+00	4.85E+03	1.60E+02	1.73E+02	0.00E+00	0.00E+00	0.00E+00	4.85E+03	1.96E+02	1.33E+01	4.85E+03	5.87E+02	2.43E+02	0.00E+00	0.00E+00	0.00E+00	4.85E+03	5.03E+02	2.59E+02	0.00E+00	0.00E+00	0.00E+00	4.85E+03	7.83E+02	1.07E+02	4.85E+03	1.04E+03
0.00E+00	0.00E+00	0.00E+00	4.86E+03	6.93E+02	2.23E+02	4.86E+03	3.69E+02	2.94E+02	0.00E+00	0.00E+00	0.00E+00	0.00E+00	0.00E+00	0.00E+00	4.86E+03	7.74E+02	2.91E+02	4.86E+03	4.62E+02	2.93E+02	0.00E+00	0.00E+00	0.00E+00	4.86E+03	1.59E+02	1.80E+02	0.00E+00	0.00E+00	0.00E+00	4.86E+03	1.96E+02	1.34E+01	4.86E+03	5.84E+02	2.35E+02	0.00E+00	0.00E+00	0.00E+00	4.86E+03	4.98E+02	2.59E+02	0.00E+00	0.00E+00	0.00E+00	4.86E+03	7.84E+02	1.14E+02	4.86E+03	1.04E+03
0.00E+00	0.00E+00	0.00E+00	4.88E+03	6.93E+02	2.22E+02	4.88E+03	3.73E+02	2.99E+02	0.00E+00	0.00E+00	0.00E+00	0.00E+00	0.00E+00	0.00E+00	4.88E+03	7.72E+02	2.92E+02	4.88E+03	4.62E+02	2.93E+02	0.00E+00	0.00E+00	0.00E+00	4.88E+03	1.64E+02	1.86E+02	0.00E+00	0.00E+00	0.00E+00	4.88E+03	1.97E+02	1.13E+01	4.88E+03	5.87E+02	2.29E+02	0.00E+00	0.00E+00	0.00E+00	4.88E+03	4.93E+02	2.57E+02	0.00E+00	0.00E+00	0.00E+00	4.88E+03	7.80E+02	1.21E+02	4.88E+03	1.04E+03
0.00E+00	0.00E+00	0.00E+00	4.89E+03	6.93E+02	2.21E+02	4.89E+03	3.72E+02	3.05E+02	0.00E+00	0.00E+00	0.00E+00	0.00E+00	0.00E+00	0.00E+00	4.89E+03	7.69E+02	2.93E+02	4.89E+03	4.62E+02	2.93E+02	0.00E+00	0.00E+00	0.00E+00	4.89E+03	1.66E+02	1.92E+02	0.00E+00	0.00E+00	0.00E+00	4.89E+03	1.98E+02	8.90E+00	4.89E+03	5.91E+02	2.28E+02	0.00E+00	0.00E+00	0.00E+00	4.89E+03	4.87E+02	2.59E+02	0.00E+00	0.00E+00	0.00E+00	4.89E+03	7.76E+02	1.26E+02	4.89E+03	1.05E+03
0.00E+00	0.00E+00	0.00E+00	4.91E+03	6.94E+02	2.18E+02	4.91E+03	3.69E+02	3.09E+02	0.00E+00	0.00E+00	0.00E+00	0.00E+00	0.00E+00	0.00E+00	4.91E+03	7.65E+02	2.95E+02	4.91E+03	4.62E+02	2.92E+02	0.00E+00	0.00E+00	0.00E+00	4.91E+03	1.67E+02	1.99E+02	0.00E+00	0.00E+00	0.00E+00	4.91E+03	1.98E+02	9.38E+00	4.91E+03	5.93E+02	2.28E+02	0.00E+00	0.00E+00	0.00E+00	4.91E+03	4.81E+02	2.62E+02	0.00E+00	0.00E+00	0.00E+00	4.91E+03	7.70E+02	1.27E+02	4.91E+03	1.05E+03
0.00E+00	0.00E+00	0.00E+00	4.92E+03	6.94E+02	2.18E+02	4.92E+03	3.67E+02	3.14E+02	0.00E+00	0.00E+00	0.00E+00	0.00E+00	0.00E+00	0.00E+00	4.92E+03	7.63E+02	2.98E+02	4.92E+03	4.62E+02	2.92E+02	0.00E+00	0.00E+00	0.00E+00	4.92E+03	1.69E+02	2.04E+02	0.00E+00	0.00E+00	0.00E+00	4.92E+03	1.98E+02	9.24E+00	4.92E+03	5.92E+02	2.28E+02	0.00E+00	0.00E+00	0.00E+00	4.92E+03	4.82E+02	2.71E+02	0.00E+00	0.00E+00	0.00E+00	4.92E+03	7.65E+02	1.32E+02	4.92E+03	1.05E+03
0.00E+00	0.00E+00	0.00E+00	4.94E+03	6.94E+02	2.18E+02	4.94E+03	3.65E+02	3.16E+02	0.00E+00	0.00E+00	0.00E+00	0.00E+00	0.00E+00	0.00E+00	4.94E+03	7.63E+02	3.01E+02	4.94E+03	4.61E+02	2.92E+02	0.00E+00	0.00E+00	0.00E+00	4.94E+03	1.68E+02	2.11E+02	0.00E+00	0.00E+00	0.00E+00	4.94E+03	1.98E+02	8.99E+00	4.94E+03	5.92E+02	2.23E+02	0.00E+00	0.00E+00	0.00E+00	4.94E+03	4.81E+02	2.76E+02	0.00E+00	0.00E+00	0.00E+00	4.94E+03	7.59E+02	1.30E+02	4.94E+03	1.06E+03
0.00E+00	0.00E+00	0.00E+00	4.95E+03	6.94E+02	2.18E+02	4.95E+03	3.61E+02	3.19E+02	0.00E+00	0.00E+00	0.00E+00	0.00E+00	0.00E+00	0.00E+00	4.95E+03	7.61E+02	3.07E+02	4.95E+03	4.62E+02	2.92E+02	0.00E+00	0.00E+00	0.00E+00	4.95E+03	1.66E+02	2.17E+02	0.00E+00	0.00E+00	0.00E+00	4.95E+03	1.98E+02	8.97E+00	4.95E+03	5.93E+02	2.15E+02	0.00E+00	0.00E+00	0.00E+00	4.95E+03	4.78E+02	2.78E+02	0.00E+00	0.00E+00	0.00E+00	4.95E+03	7.54E+02	1.26E+02	4.95E+03	1.06E+03
0.00E+00	0.00E+00	0.00E+00	4.97E+03	6.94E+02	2.18E+02	4.97E+03	3.56E+02	3.20E+02	0.00E+00	0.00E+00	0.00E+00	0.00E+00	0.00E+00	0.00E+00	4.97E+03	7.58E+02	3.13E+02	4.97E+03	4.61E+02	2.92E+02	0.00E+00	0.00E+00	0.00E+00	4.97E+03	1.64E+02	2.22E+02	0.00E+00	0.00E+00	0.00E+00	4.97E+03	1.98E+02	9.24E+00	4.97E+03	5.97E+02	2.11E+02	0.00E+00	0.00E+00	0.00E+00	4.97E+03	4.74E+02	2.82E+02	0.00E+00	0.00E+00	0.00E+00	4.97E+03	7.50E+02	1.21E+02	4.97E+03	1.06E+03
0.00E+00	0.00E+00	0.00E+00	4.98E+03	6.94E+02	2.18E+02	4.98E+03	3.51E+02	3.17E+02	0.00E+00	0.00E+00	0.00E+00	0.00E+00	0.00E+00	0.00E+00	4.98E+03	7.55E+02	3.15E+02	4.98E+03	4.61E+02	2.93E+02	0.00E+00	0.00E+00	0.00E+00	4.98E+03	1.61E+02	2.26E+02	0.00E+00	0.00E+00	0.00E+00	4.98E+03	1.97E+02	9.10E+00	4.98E+03	6.03E+02	2.07E+02	0.00E+00	0.00E+00	0.00E+00	4.98E+03	4.72E+02	2.91E+02	0.00E+00	0.00E+00	0.00E+00	4.98E+03	7.48E+02	1.16E+02	4.98E+03	1.06E+03
0.00E+00	0.00E+00	0.00E+00	5.00E+03	6.94E+02	2.18E+02	5.00E+03	3.45E+02	3.17E+02	0.00E+00	0.00E+00	0.00E+00	0.00E+00	0.00E+00	0.00E+00	5.00E+03	7.47E+02	3.19E+02	5.00E+03	4.61E+02	2.93E+02	0.00E+00	0.00E+00	0.00E+00	5.00E+03	1.57E+02	2.31E+02	0.00E+00	0.00E+00	0.00E+00	5.00E+03	1.94E+02	7.24E+00	5.00E+03	6.08E+02	2.05E+02	0.00E+00	0.00E+00	0.00E+00	5.00E+03	4.70E+02	2.97E+02	0.00E+00	0.00E+00	0.00E+00	5.00E+03	7.48E+02	1.12E+02	5.00E+03	1.06E+03
0.00E+00	0.00E+00	0.00E+00	5.01E+03	6.94E+02	2.18E+02	5.01E+03	3.39E+02	3.17E+02	0.00E+00	0.00E+00	0.00E+00	0.00E+00	0.00E+00	0.00E+00	5.01E+03	7.51E+02	3.08E+02	5.01E+03	4.60E+02	2.94E+02	0.00E+00	0.00E+00	0.00E+00	5.01E+03	1.52E+02	2.35E+02	0.00E+00	0.00E+00	0.00E+00	5.01E+03	1.94E+02	6.99E+00	5.01E+03	6.15E+02	2.02E+02	0.00E+00	0.00E+00	0.00E+00	5.01E+03	4.73E+02	3.02E+02	0.00E+00	0.00E+00	0.00E+00	5.01E+03	7.48E+02	1.12E+02	5.01E+03	1.06E+03
0.00E+00	0.00E+00	0.00E+00	5.03E+03	6.94E+02	2.18E+02	5.03E+03	3.36E+02	3.26E+02	0.00E+00	0.00E+00	0.00E+00	0.00E+00	0.00E+00	0.00E+00	5.03E+03	7.55E+02	2.97E+02	5.03E+03	4.56E+02	2.98E+02	0.00E+00	0.00E+00	0.00E+00	5.03E+03	1.50E+02	2.40E+02	0.00E+00	0.00E+00	0.00E+00	5.03E+03	1.94E+02	6.92E+00	5.03E+03	6.21E+02	1.91E+02	0.00E+00	0.00E+00	0.00E+00	5.03E+03	4.77E+02	3.03E+02	0.00E+00	0.00E+00	0.00E+00	5.03E+03	7.49E+02	1.12E+02	5.03E+03	1.06E+03
0.00E+00	0.00E+00	0.00E+00	5.04E+03	6.94E+02	2.18E+02	5.04E+03	3.35E+02	3.34E+02	0.00E+00	0.00E+00	0.00E+00	0.00E+00	0.00E+00	0.00E+00	5.04E+03	7.59E+02	3.04E+02	5.04E+03	4.52E+02	3.01E+02	0.00E+00	0.00E+00	0.00E+00	5.04E+03	1.46E+02	2.47E+02	0.00E+00	0.00E+00	0.00E+00	5.04E+03	1.94E+02	6.70E+00	5.04E+03	6.24E+02	1.82E+02	0.00E+00	0.00E+00	0.00E+00	5.04E+03	4.80E+02	3.06E+02	0.00E+00	0.00E+00	0.00E+00	5.04E+03	7.49E+02	1.12E+02	5.04E+03	1.06E+03
0.00E+00	0.00E+00	0.00E+00	5.06E+03	6.94E+02	2.17E+02	5.06E+03	3.33E+02	3.38E+02	0.00E+00	0.00E+00	0.00E+00	0.00E+00	0.00E+00	0.00E+00	5.07E+03	7.63E+02	3.06E+02	5.06E+03	4.51E+02	3.04E+02	0.00E+00	0.00E+00	0.00E+00	5.06E+03	1.44E+02	2.49E+02	0.00E+00	0.00E+00	0.00E+00	5.06E+03	1.94E+02	4.88E+00	5.06E+03	6.28E+02	1.75E+02	0.00E+00	0.00E+00	0.00E+00	5.06E+03	4.85E+02	3.08E+02	0.00E+00	0.00E+00	0.00E+00	5.06E+03	7.49E+02	1.12E+02	5.06E+03	1.07E+03
0.00E+00	0.00E+00	0.00E+00	5.07E+03	6.94E+02	2.15E+02	5.07E+03	3.34E+02	3.45E+02	0.00E+00	0.00E+00	0.00E+00	0.00E+00	0.00E+00	0.00E+00	5.09E+03	7.61E+02	3.06E+02	5.07E+03	4.48E+02	3.13E+02	0.00E+00	0.00E+00	0.00E+00	5.07E+03	1.37E+02	2.47E+02	0.00E+00	0.00E+00	0.00E+00	5.07E+03	1.97E+02	5.06E+00	5.07E+03	6.36E+02	1.74E+02	0.00E+00	0.00E+00	0.00E+00	5.07E+03	4.87E+02	3.10E+02	0.00E+00	0.00E+00	0.00E+00	5.07E+03	7.48E+02	1.12E+02	5.07E+03	1.07E+03
0.00E+00	0.00E+00	0.00E+00	5.09E+03	6.92E+02	2.14E+02	0.00E+00	0.00E+00	0.00E+00	0.00E+00	0.00E+00	0.00E+00	0.00E+00	0.00E+00	0.00E+00	5.10E+03	7.60E+02	3.06E+02	5.09E+03	4.43E+02	3.18E+02	0.00E+00	0.00E+00	0.00E+00	5.09E+03	1.34E+02	2.45E+02	0.00E+00	0.00E+00	0.00E+00	5.09E+03	1.97E+02	6.91E+00	5.09E+03	6.44E+02	1.78E+02	0.00E+00	0.00E+00	0.00E+00	5.09E+03	4.92E+02	3.14E+02	0.00E+00	0.00E+00	0.00E+00	5.09E+03	7.48E+02	1.11E+02	5.09E+03	1.08E+03
0.00E+00	0.00E+00	0.00E+00	5.10E+03	6.88E+02	2.17E+02	0.00E+00	0.00E+00	0.00E+00	0.00E+00	0.00E+00	0.00E+00	0.00E+00	0.00E+00	0.00E+00	0.00E+00	0.00E+00	0.00E+00	5.10E+03	4.41E+02	3.21E+02	0.00E+00	0.00E+00	0.00E+00	5.10E+03	1.32E+02	2.36E+02	0.00E+00	0.00E+00	0.00E+00	5.10E+03	1.97E+02	6.00E+00	5.10E+03	6.52E+02	1.81E+02	0.00E+00	0.00E+00	0.00E+00	5.10E+03	4.98E+02	3.13E+02	0.00E+00	0.00E+00	0.00E+00	5.10E+03	7.48E+02	1.11E+02	5.10E+03	1.08E+03
0.00E+00	0.00E+00	0.00E+00	5.12E+03	6.88E+02	2.17E+02	0.00E+00	0.00E+00	0.00E+00	0.00E+00	0.00E+00	0.00E+00	0.00E+00	0.00E+00	0.00E+00	0.00E+00	0.00E+00	0.00E+00	5.12E+03	4.36E+02	3.24E+02	0.00E+00	0.00E+00	0.00E+00	5.12E+03	1.29E+02	2.28E+02	0.00E+00	0.00E+00	0.00E+00	5.12E+03	1.97E+02	4.58E+00	5.12E+03	6.61E+02	1.76E+02	0.00E+00	0.00E+00	0.00E+00	5.12E+03	5.00E+02	3.14E+02	0.00E+00	0.00E+00	0.00E+00	5.12E+03	7.49E+02	1.10E+02	5.12E+03	1.09E+03
0.00E+00	0.00E+00	0.00E+00	5.13E+03	6.88E+02	2.17E+02	0.00E+00	0.00E+00	0.00E+00	0.00E+00	0.00E+00	0.00E+00	0.00E+00	0.00E+00	0.00E+00	0.00E+00	0.00E+00	0.00E+00	5.13E+03	4.32E+02	3.24E+02	0.00E+00	0.00E+00	0.00E+00	5.13E+03	1.22E+02	2.24E+02	0.00E+00	0.00E+00	0.00E+00	5.13E+03	1.99E+02	4.17E+00	5.13E+03	6.67E+02	1.75E+02	0.00E+00	0.00E+00	0.00E+00	5.13E+03	5.06E+02	3.11E+02	0.00E+00	0.00E+00	0.00E+00	5.13E+03	7.49E+02	1.11E+02	5.13E+03	1.09E+03
0.00E+00	0.00E+00	0.00E+00	5.15E+03	6.89E+02	2.16E+02	0.00E+00	0.00E+00	0.00E+00	0.00E+00	0.00E+00	0.00E+00	0.00E+00	0.00E+00	0.00E+00	0.00E+00	0.00E+00	0.00E+00	5.15E+03	4.28E+02	3.22E+02	0.00E+00	0.00E+00	0.00E+00	5.15E+03	1.16E+02	2.21E+02	0.00E+00	0.00E+00	0.00E+00	5.15E+03	1.98E+02	3.43E+00	5.15E+03	6.71E+02	1.70E+02	0.00E+00	0.00E+00	0.00E+00	5.15E+03	5.12E+02	3.06E+02	0.00E+00	0.00E+00	0.00E+00	5.15E+03	7.48E+02	1.11E+02	5.15E+03	1.09E+03
0.00E+00	0.00E+00	0.00E+00	5.16E+03	6.89E+02	2.16E+02	0.00E+00	0.00E+00	0.00E+00	0.00E+00	0.00E+00	0.00E+00	0.00E+00	0.00E+00	0.00E+00	0.00E+00	0.00E+00	0.00E+00	5.16E+03	4.27E+02	3.23E+02	0.00E+00	0.00E+00	0.00E+00	5.16E+03	1.08E+02	2.19E+02	0.00E+00	0.00E+00	0.00E+00	5.16E+03	1.98E+02	2.64E+00	5.16E+03	6.78E+02	1.67E+02	0.00E+00	0.00E+00	0.00E+00	5.16E+03	5.15E+02	3.02E+02	0.00E+00	0.00E+00	0.00E+00	5.16E+03	7.49E+02	1.11E+02	5.16E+03	1.09E+03
0.00E+00	0.00E+00	0.00E+00	5.18E+03	6.94E+02	2.24E+02	0.00E+00	0.00E+00	0.00E+00	0.00E+00	0.00E+00	0.00E+00	0.00E+00	0.00E+00	0.00E+00	0.00E+00	0.00E+00	0.00E+00	5.18E+03	4.24E+02	3.30E+02	0.00E+00	0.00E+00	0.00E+00	5.18E+03	1.04E+02	2.14E+02	0.00E+00	0.00E+00	0.00E+00	5.18E+03	1.98E+02	2.68E+00	5.18E+03	6.84E+02	1.62E+02	0.00E+00	0.00E+00	0.00E+00	5.18E+03	5.18E+02	3.01E+02	0.00E+00	0.00E+00	0.00E+00	5.18E+03	7.50E+02	1.11E+02	5.18E+03	1.09E+03
0.00E+00	0.00E+00	0.00E+00	5.19E+03	6.98E+02	2.28E+02	0.00E+00	0.00E+00	0.00E+00	0.00E+00	0.00E+00	0.00E+00	0.00E+00	0.00E+00	0.00E+00	0.00E+00	0.00E+00	0.00E+00	5.19E+03	4.17E+02	3.33E+02	0.00E+00	0.00E+00	0.00E+00	5.19E+03	1.06E+02	2.05E+02	0.00E+00	0.00E+00	0.00E+00	0.00E+00	0.00E+00	0.00E+00	5.19E+03	6.89E+02	1.61E+02	0.00E+00	0.00E+00	0.00E+00	5.19E+03	5.23E+02	3.04E+02	0.00E+00	0.00E+00	0.00E+00	5.19E+03	7.48E+02	1.11E+02	5.19E+03	1.08E+03
0.00E+00	0.00E+00	0.00E+00	5.21E+03	7.05E+02	2.31E+02	0.00E+00	0.00E+00	0.00E+00	0.00E+00	0.00E+00	0.00E+00	0.00E+00	0.00E+00	0.00E+00	0.00E+00	0.00E+00	0.00E+00	5.21E+03	4.12E+02	3.32E+02	0.00E+00	0.00E+00	0.00E+00	5.21E+03	1.08E+02	2.01E+02	0.00E+00	0.00E+00	0.00E+00	0.00E+00	0.00E+00	0.00E+00	5.21E+03	6.92E+02	1.61E+02	0.00E+00	0.00E+00	0.00E+00	5.21E+03	5.25E+02	3.07E+02	0.00E+00	0.00E+00	0.00E+00	5.21E+03	7.46E+02	1.10E+02	5.21E+03	1.08E+03
0.00E+00	0.00E+00	0.00E+00	5.22E+03	7.14E+02	2.26E+02	0.00E+00	0.00E+00	0.00E+00	0.00E+00	0.00E+00	0.00E+00	0.00E+00	0.00E+00	0.00E+00	0.00E+00	0.00E+00	0.00E+00	5.22E+03	4.07E+02	3.31E+02	0.00E+00	0.00E+00	0.00E+00	5.22E+03	1.15E+02	1.98E+02	0.00E+00	0.00E+00	0.00E+00	0.00E+00	0.00E+00	0.00E+00	5.22E+03	6.94E+02	1.61E+02	0.00E+00	0.00E+00	0.00E+00	5.22E+03	5.26E+02	3.09E+02	0.00E+00	0.00E+00	0.00E+00	5.22E+03	7.45E+02	1.09E+02	5.22E+03	1.08E+03
0.00E+00	0.00E+00	0.00E+00	5.24E+03	7.15E+02	2.22E+02	0.00E+00	0.00E+00	0.00E+00	0.00E+00	0.00E+00	0.00E+00	0.00E+00	0.00E+00	0.00E+00	0.00E+00	0.00E+00	0.00E+00	5.24E+03	4.09E+02	3.24E+02	0.00E+00	0.00E+00	0.00E+00	5.24E+03	1.20E+02	1.96E+02	0.00E+00	0.00E+00	0.00E+00	0.00E+00	0.00E+00	0.00E+00	5.24E+03	6.99E+02	1.63E+02	0.00E+00	0.00E+00	0.00E+00	5.24E+03	5.29E+02	3.10E+02	0.00E+00	0.00E+00	0.00E+00	5.24E+03	7.45E+02	1.09E+02	5.24E+03	1.08E+03
0.00E+00	0.00E+00	0.00E+00	5.25E+03	7.13E+02	2.16E+02	0.00E+00	0.00E+00	0.00E+00	0.00E+00	0.00E+00	0.00E+00	0.00E+00	0.00E+00	0.00E+00	0.00E+00	0.00E+00	0.00E+00	5.25E+03	4.15E+02	3.22E+02	0.00E+00	0.00E+00	0.00E+00	5.25E+03	1.24E+02	1.97E+02	0.00E+00	0.00E+00	0.00E+00	0.00E+00	0.00E+00	0.00E+00	5.25E+03	7.06E+02	1.62E+02	0.00E+00	0.00E+00	0.00E+00	5.25E+03	5.34E+02	3.08E+02	0.00E+00	0.00E+00	0.00E+00	5.25E+03	7.42E+02	1.09E+02	5.25E+03	1.09E+03
0.00E+00	0.00E+00	0.00E+00	5.27E+03	7.10E+02	2.13E+02	0.00E+00	0.00E+00	0.00E+00	0.00E+00	0.00E+00	0.00E+00	0.00E+00	0.00E+00	0.00E+00	0.00E+00	0.00E+00	0.00E+00	5.27E+03	4.23E+02	3.22E+02	0.00E+00	0.00E+00	0.00E+00	5.27E+03	1.34E+02	2.00E+02	0.00E+00	0.00E+00	0.00E+00	0.00E+00	0.00E+00	0.00E+00	5.27E+03	7.10E+02	1.60E+02	0.00E+00	0.00E+00	0.00E+00	5.27E+03	5.39E+02	3.07E+02	0.00E+00	0.00E+00	0.00E+00	5.27E+03	7.41E+02	1.07E+02	5.27E+03	1.09E+03
0.00E+00	0.00E+00	0.00E+00	5.28E+03	7.04E+02	2.11E+02	0.00E+00	0.00E+00	0.00E+00	0.00E+00	0.00E+00	0.00E+00	0.00E+00	0.00E+00	0.00E+00	0.00E+00	0.00E+00	0.00E+00	5.28E+03	4.30E+02	3.27E+02	0.00E+00	0.00E+00	0.00E+00	5.28E+03	1.39E+02	2.06E+02	0.00E+00	0.00E+00	0.00E+00	0.00E+00	0.00E+00	0.00E+00	5.28E+03	7.15E+02	1.55E+02	0.00E+00	0.00E+00	0.00E+00	5.28E+03	5.43E+02	3.09E+02	0.00E+00	0.00E+00	0.00E+00	5.28E+03	7.40E+02	1.06E+02	5.28E+03	1.10E+03
0.00E+00	0.00E+00	0.00E+00	5.30E+03	6.98E+02	2.09E+02	0.00E+00	0.00E+00	0.00E+00	0.00E+00	0.00E+00	0.00E+00	0.00E+00	0.00E+00	0.00E+00	0.00E+00	0.00E+00	0.00E+00	5.30E+03	4.36E+02	3.28E+02	0.00E+00	0.00E+00	0.00E+00	5.30E+03	1.33E+02	2.12E+02	0.00E+00	0.00E+00	0.00E+00	0.00E+00	0.00E+00	0.00E+00	5.30E+03	7.17E+02	1.53E+02	0.00E+00	0.00E+00	0.00E+00	5.30E+03	5.45E+02	3.10E+02	0.00E+00	0.00E+00	0.00E+00	5.30E+03	7.39E+02	1.05E+02	5.30E+03	1.10E+03
0.00E+00	0.00E+00	0.00E+00	5.31E+03	6.94E+02	2.08E+02	0.00E+00	0.00E+00	0.00E+00	0.00E+00	0.00E+00	0.00E+00	0.00E+00	0.00E+00	0.00E+00	0.00E+00	0.00E+00	0.00E+00	5.31E+03	4.39E+02	3.32E+02	0.00E+00	0.00E+00	0.00E+00	5.31E+03	1.27E+02	2.12E+02	0.00E+00	0.00E+00	0.00E+00	0.00E+00	0.00E+00	0.00E+00	5.31E+03	7.21E+02	1.50E+02	0.00E+00	0.00E+00	0.00E+00	5.31E+03	5.51E+02	3.10E+02	0.00E+00	0.00E+00	0.00E+00	5.31E+03	7.38E+02	1.04E+02	5.31E+03	1.10E+03
0.00E+00	0.00E+00	0.00E+00	5.33E+03	6.91E+02	2.03E+02	0.00E+00	0.00E+00	0.00E+00	0.00E+00	0.00E+00	0.00E+00	0.00E+00	0.00E+00	0.00E+00	0.00E+00	0.00E+00	0.00E+00	5.33E+03	4.39E+02	3.40E+02	0.00E+00	0.00E+00	0.00E+00	5.33E+03	1.24E+02	2.15E+02	0.00E+00	0.00E+00	0.00E+00	0.00E+00	0.00E+00	0.00E+00	5.33E+03	7.26E+02	1.45E+02	0.00E+00	0.00E+00	0.00E+00	5.33E+03	5.55E+02	3.06E+02	0.00E+00	0.00E+00	0.00E+00	5.33E+03	7.35E+02	1.05E+02	5.33E+03	1.10E+03
0.00E+00	0.00E+00	0.00E+00	5.34E+03	6.85E+02	1.98E+02	0.00E+00	0.00E+00	0.00E+00	0.00E+00	0.00E+00	0.00E+00	0.00E+00	0.00E+00	0.00E+00	0.00E+00	0.00E+00	0.00E+00	0.00E+00	0.00E+00	0.00E+00	0.00E+00	0.00E+00	0.00E+00	5.34E+03	1.26E+02	2.20E+02	0.00E+00	0.00E+00	0.00E+00	0.00E+00	0.00E+00	0.00E+00	5.34E+03	7.30E+02	1.41E+02	0.00E+00	0.00E+00	0.00E+00	5.34E+03	5.56E+02	3.02E+02	0.00E+00	0.00E+00	0.00E+00	5.34E+03	7.33E+02	1.08E+02	5.34E+03	1.11E+03
0.00E+00	0.00E+00	0.00E+00	5.36E+03	6.82E+02	1.94E+02	0.00E+00	0.00E+00	0.00E+00	0.00E+00	0.00E+00	0.00E+00	0.00E+00	0.00E+00	0.00E+00	0.00E+00	0.00E+00	0.00E+00	0.00E+00	0.00E+00	0.00E+00	0.00E+00	0.00E+00	0.00E+00	5.36E+03	1.29E+02	2.25E+02	0.00E+00	0.00E+00	0.00E+00	0.00E+00	0.00E+00	0.00E+00	5.36E+03	7.33E+02	1.40E+02	0.00E+00	0.00E+00	0.00E+00	5.36E+03	5.59E+02	3.01E+02	0.00E+00	0.00E+00	0.00E+00	5.36E+03	7.30E+02	1.10E+02	5.36E+03	1.11E+03
0.00E+00	0.00E+00	0.00E+00	5.37E+03	6.78E+02	1.88E+02	0.00E+00	0.00E+00	0.00E+00	0.00E+00	0.00E+00	0.00E+00	0.00E+00	0.00E+00	0.00E+00	0.00E+00	0.00E+00	0.00E+00	0.00E+00	0.00E+00	0.00E+00	0.00E+00	0.00E+00	0.00E+00	5.37E+03	1.32E+02	2.35E+02	0.00E+00	0.00E+00	0.00E+00	0.00E+00	0.00E+00	0.00E+00	5.37E+03	7.35E+02	1.39E+02	0.00E+00	0.00E+00	0.00E+00	5.37E+03	5.60E+02	3.04E+02	0.00E+00	0.00E+00	0.00E+00	5.37E+03	7.28E+02	1.11E+02	5.37E+03	1.11E+03
0.00E+00	0.00E+00	0.00E+00	5.39E+03	6.80E+02	1.79E+02	0.00E+00	0.00E+00	0.00E+00	0.00E+00	0.00E+00	0.00E+00	0.00E+00	0.00E+00	0.00E+00	0.00E+00	0.00E+00	0.00E+00	0.00E+00	0.00E+00	0.00E+00	0.00E+00	0.00E+00	0.00E+00	5.39E+03	1.36E+02	2.43E+02	0.00E+00	0.00E+00	0.00E+00	0.00E+00	0.00E+00	0.00E+00	5.39E+03	7.39E+02	1.38E+02	0.00E+00	0.00E+00	0.00E+00	5.39E+03	5.62E+02	3.11E+02	0.00E+00	0.00E+00	0.00E+00	5.39E+03	7.23E+02	1.09E+02	5.39E+03	1.10E+03
0.00E+00	0.00E+00	0.00E+00	5.40E+03	6.83E+02	1.73E+02	0.00E+00	0.00E+00	0.00E+00	0.00E+00	0.00E+00	0.00E+00	0.00E+00	0.00E+00	0.00E+00	0.00E+00	0.00E+00	0.00E+00	0.00E+00	0.00E+00	0.00E+00	0.00E+00	0.00E+00	0.00E+00	5.40E+03	1.39E+02	2.47E+02	0.00E+00	0.00E+00	0.00E+00	0.00E+00	0.00E+00	0.00E+00	5.40E+03	7.45E+02	1.40E+02	0.00E+00	0.00E+00	0.00E+00	5.40E+03	5.65E+02	3.14E+02	0.00E+00	0.00E+00	0.00E+00	5.40E+03	7.20E+02	1.07E+02	5.40E+03	1.09E+03
0.00E+00	0.00E+00	0.00E+00	5.42E+03	6.86E+02	1.70E+02	0.00E+00	0.00E+00	0.00E+00	0.00E+00	0.00E+00	0.00E+00	0.00E+00	0.00E+00	0.00E+00	0.00E+00	0.00E+00	0.00E+00	0.00E+00	0.00E+00	0.00E+00	0.00E+00	0.00E+00	0.00E+00	5.42E+03	1.42E+02	2.53E+02	0.00E+00	0.00E+00	0.00E+00	0.00E+00	0.00E+00	0.00E+00	5.42E+03	7.48E+02	1.43E+02	0.00E+00	0.00E+00	0.00E+00	5.42E+03	5.69E+02	3.15E+02	0.00E+00	0.00E+00	0.00E+00	5.42E+03	7.16E+02	1.08E+02	5.42E+03	1.09E+03
0.00E+00	0.00E+00	0.00E+00	5.43E+03	6.88E+02	1.66E+02	0.00E+00	0.00E+00	0.00E+00	0.00E+00	0.00E+00	0.00E+00	0.00E+00	0.00E+00	0.00E+00	0.00E+00	0.00E+00	0.00E+00	0.00E+00	0.00E+00	0.00E+00	0.00E+00	0.00E+00	0.00E+00	5.43E+03	1.39E+02	2.56E+02	0.00E+00	0.00E+00	0.00E+00	0.00E+00	0.00E+00	0.00E+00	5.43E+03	7.50E+02	1.48E+02	0.00E+00	0.00E+00	0.00E+00	5.43E+03	5.74E+02	3.16E+02	0.00E+00	0.00E+00	0.00E+00	5.43E+03	7.13E+02	1.12E+02	5.43E+03	1.09E+03
0.00E+00	0.00E+00	0.00E+00	5.45E+03	6.89E+02	1.60E+02	0.00E+00	0.00E+00	0.00E+00	0.00E+00	0.00E+00	0.00E+00	0.00E+00	0.00E+00	0.00E+00	0.00E+00	0.00E+00	0.00E+00	0.00E+00	0.00E+00	0.00E+00	0.00E+00	0.00E+00	0.00E+00	5.45E+03	1.36E+02	2.60E+02	0.00E+00	0.00E+00	0.00E+00	0.00E+00	0.00E+00	0.00E+00	5.45E+03	7.49E+02	1.48E+02	0.00E+00	0.00E+00	0.00E+00	5.45E+03	5.76E+02	3.21E+02	0.00E+00	0.00E+00	0.00E+00	5.45E+03	7.09E+02	1.14E+02	5.45E+03	1.09E+03
0.00E+00	0.00E+00	0.00E+00	5.46E+03	6.88E+02	1.55E+02	0.00E+00	0.00E+00	0.00E+00	0.00E+00	0.00E+00	0.00E+00	0.00E+00	0.00E+00	0.00E+00	0.00E+00	0.00E+00	0.00E+00	0.00E+00	0.00E+00	0.00E+00	0.00E+00	0.00E+00	0.00E+00	5.46E+03	1.33E+02	2.69E+02	0.00E+00	0.00E+00	0.00E+00	0.00E+00	0.00E+00	0.00E+00	5.46E+03	7.44E+02	1.47E+02	0.00E+00	0.00E+00	0.00E+00	5.46E+03	5.74E+02	3.29E+02	0.00E+00	0.00E+00	0.00E+00	5.46E+03	7.06E+02	1.14E+02	5.46E+03	1.09E+03
0.00E+00	0.00E+00	0.00E+00	5.48E+03	6.83E+02	1.49E+02	0.00E+00	0.00E+00	0.00E+00	0.00E+00	0.00E+00	0.00E+00	0.00E+00	0.00E+00	0.00E+00	0.00E+00	0.00E+00	0.00E+00	0.00E+00	0.00E+00	0.00E+00	0.00E+00	0.00E+00	0.00E+00	5.48E+03	1.26E+02	2.68E+02	0.00E+00	0.00E+00	0.00E+00	0.00E+00	0.00E+00	0.00E+00	5.48E+03	7.40E+02	1.49E+02	0.00E+00	0.00E+00	0.00E+00	5.48E+03	5.74E+02	3.34E+02	0.00E+00	0.00E+00	0.00E+00	5.48E+03	7.01E+02	1.15E+02	5.48E+03	1.08E+03
0.00E+00	0.00E+00	0.00E+00	5.49E+03	6.76E+02	1.48E+02	0.00E+00	0.00E+00	0.00E+00	0.00E+00	0.00E+00	0.00E+00	0.00E+00	0.00E+00	0.00E+00	0.00E+00	0.00E+00	0.00E+00	0.00E+00	0.00E+00	0.00E+00	0.00E+00	0.00E+00	0.00E+00	5.49E+03	1.24E+02	2.62E+02	0.00E+00	0.00E+00	0.00E+00	0.00E+00	0.00E+00	0.00E+00	5.49E+03	7.32E+02	1.44E+02	0.00E+00	0.00E+00	0.00E+00	5.49E+03	5.77E+02	3.35E+02	0.00E+00	0.00E+00	0.00E+00	5.49E+03	6.99E+02	1.19E+02	5.49E+03	1.08E+03
0.00E+00	0.00E+00	0.00E+00	5.51E+03	6.72E+02	1.47E+02	0.00E+00	0.00E+00	0.00E+00	0.00E+00	0.00E+00	0.00E+00	0.00E+00	0.00E+00	0.00E+00	0.00E+00	0.00E+00	0.00E+00	0.00E+00	0.00E+00	0.00E+00	0.00E+00	0.00E+00	0.00E+00	5.51E+03	1.17E+02	2.60E+02	0.00E+00	0.00E+00	0.00E+00	0.00E+00	0.00E+00	0.00E+00	5.51E+03	7.24E+02	1.42E+02	0.00E+00	0.00E+00	0.00E+00	5.51E+03	5.83E+02	3.32E+02	0.00E+00	0.00E+00	0.00E+00	5.51E+03	7.00E+02	1.25E+02	5.51E+03	1.09E+03
0.00E+00	0.00E+00	0.00E+00	5.52E+03	6.65E+02	1.45E+02	0.00E+00	0.00E+00	0.00E+00	0.00E+00	0.00E+00	0.00E+00	0.00E+00	0.00E+00	0.00E+00	0.00E+00	0.00E+00	0.00E+00	0.00E+00	0.00E+00	0.00E+00	0.00E+00	0.00E+00	0.00E+00	5.52E+03	1.11E+02	2.61E+02	0.00E+00	0.00E+00	0.00E+00	0.00E+00	0.00E+00	0.00E+00	5.52E+03	7.20E+02	1.39E+02	0.00E+00	0.00E+00	0.00E+00	5.52E+03	5.87E+02	3.31E+02	0.00E+00	0.00E+00	0.00E+00	5.52E+03	7.02E+02	1.30E+02	5.52E+03	1.09E+03
0.00E+00	0.00E+00	0.00E+00	5.54E+03	6.61E+02	1.40E+02	0.00E+00	0.00E+00	0.00E+00	0.00E+00	0.00E+00	0.00E+00	0.00E+00	0.00E+00	0.00E+00	0.00E+00	0.00E+00	0.00E+00	0.00E+00	0.00E+00	0.00E+00	0.00E+00	0.00E+00	0.00E+00	5.54E+03	1.10E+02	2.63E+02	0.00E+00	0.00E+00	0.00E+00	0.00E+00	0.00E+00	0.00E+00	5.54E+03	7.19E+02	1.35E+02	0.00E+00	0.00E+00	0.00E+00	5.54E+03	5.94E+02	3.33E+02	0.00E+00	0.00E+00	0.00E+00	5.54E+03	7.00E+02	1.35E+02	5.54E+03	1.09E+03
0.00E+00	0.00E+00	0.00E+00	5.55E+03	6.61E+02	1.29E+02	0.00E+00	0.00E+00	0.00E+00	0.00E+00	0.00E+00	0.00E+00	0.00E+00	0.00E+00	0.00E+00	0.00E+00	0.00E+00	0.00E+00	0.00E+00	0.00E+00	0.00E+00	0.00E+00	0.00E+00	0.00E+00	5.55E+03	1.09E+02	2.65E+02	0.00E+00	0.00E+00	0.00E+00	0.00E+00	0.00E+00	0.00E+00	5.55E+03	7.14E+02	1.32E+02	0.00E+00	0.00E+00	0.00E+00	5.55E+03	5.99E+02	3.36E+02	0.00E+00	0.00E+00	0.00E+00	5.55E+03	6.99E+02	1.38E+02	5.55E+03	1.09E+03
0.00E+00	0.00E+00	0.00E+00	5.57E+03	6.66E+02	1.23E+02	0.00E+00	0.00E+00	0.00E+00	0.00E+00	0.00E+00	0.00E+00	0.00E+00	0.00E+00	0.00E+00	0.00E+00	0.00E+00	0.00E+00	0.00E+00	0.00E+00	0.00E+00	0.00E+00	0.00E+00	0.00E+00	5.57E+03	1.07E+02	2.68E+02	0.00E+00	0.00E+00	0.00E+00	0.00E+00	0.00E+00	0.00E+00	5.57E+03	7.09E+02	1.29E+02	0.00E+00	0.00E+00	0.00E+00	5.57E+03	6.01E+02	3.37E+02	0.00E+00	0.00E+00	0.00E+00	5.57E+03	7.05E+02	1.40E+02	5.57E+03	1.09E+03
0.00E+00	0.00E+00	0.00E+00	5.58E+03	6.63E+02	1.18E+02	0.00E+00	0.00E+00	0.00E+00	0.00E+00	0.00E+00	0.00E+00	0.00E+00	0.00E+00	0.00E+00	0.00E+00	0.00E+00	0.00E+00	0.00E+00	0.00E+00	0.00E+00	0.00E+00	0.00E+00	0.00E+00	5.58E+03	1.02E+02	2.73E+02	0.00E+00	0.00E+00	0.00E+00	0.00E+00	0.00E+00	0.00E+00	5.58E+03	7.05E+02	1.25E+02	0.00E+00	0.00E+00	0.00E+00	5.58E+03	6.00E+02	3.41E+02	0.00E+00	0.00E+00	0.00E+00	5.58E+03	7.08E+02	1.41E+02	5.58E+03	1.09E+03
0.00E+00	0.00E+00	0.00E+00	5.60E+03	6.59E+02	1.14E+02	0.00E+00	0.00E+00	0.00E+00	0.00E+00	0.00E+00	0.00E+00	0.00E+00	0.00E+00	0.00E+00	0.00E+00	0.00E+00	0.00E+00	0.00E+00	0.00E+00	0.00E+00	0.00E+00	0.00E+00	0.00E+00	5.60E+03	9.46E+01	2.78E+02	0.00E+00	0.00E+00	0.00E+00	0.00E+00	0.00E+00	0.00E+00	5.60E+03	6.99E+02	1.23E+02	0.00E+00	0.00E+00	0.00E+00	5.60E+03	6.01E+02	3.47E+02	0.00E+00	0.00E+00	0.00E+00	5.60E+03	7.13E+02	1.45E+02	5.60E+03	1.09E+03
0.00E+00	0.00E+00	0.00E+00	5.61E+03	6.59E+02	1.06E+02	0.00E+00	0.00E+00	0.00E+00	0.00E+00	0.00E+00	0.00E+00	0.00E+00	0.00E+00	0.00E+00	0.00E+00	0.00E+00	0.00E+00	0.00E+00	0.00E+00	0.00E+00	0.00E+00	0.00E+00	0.00E+00	5.61E+03	8.82E+01	2.82E+02	0.00E+00	0.00E+00	0.00E+00	0.00E+00	0.00E+00	0.00E+00	5.61E+03	6.92E+02	1.24E+02	0.00E+00	0.00E+00	0.00E+00	0.00E+00	0.00E+00	0.00E+00	0.00E+00	0.00E+00	0.00E+00	5.61E+03	7.15E+02	1.47E+02	5.61E+03	1.09E+03
0.00E+00	0.00E+00	0.00E+00	5.63E+03	6.64E+02	1.02E+02	0.00E+00	0.00E+00	0.00E+00	0.00E+00	0.00E+00	0.00E+00	0.00E+00	0.00E+00	0.00E+00	0.00E+00	0.00E+00	0.00E+00	0.00E+00	0.00E+00	0.00E+00	0.00E+00	0.00E+00	0.00E+00	5.63E+03	8.17E+01	2.80E+02	0.00E+00	0.00E+00	0.00E+00	0.00E+00	0.00E+00	0.00E+00	5.63E+03	6.89E+02	1.29E+02	0.00E+00	0.00E+00	0.00E+00	0.00E+00	0.00E+00	0.00E+00	0.00E+00	0.00E+00	0.00E+00	5.63E+03	7.18E+02	1.47E+02	5.63E+03	1.10E+03
0.00E+00	0.00E+00	0.00E+00	5.64E+03	6.68E+02	9.97E+01	0.00E+00	0.00E+00	0.00E+00	0.00E+00	0.00E+00	0.00E+00	0.00E+00	0.00E+00	0.00E+00	0.00E+00	0.00E+00	0.00E+00	0.00E+00	0.00E+00	0.00E+00	0.00E+00	0.00E+00	0.00E+00	5.64E+03	7.85E+01	2.78E+02	0.00E+00	0.00E+00	0.00E+00	0.00E+00	0.00E+00	0.00E+00	5.64E+03	6.88E+02	1.33E+02	0.00E+00	0.00E+00	0.00E+00	0.00E+00	0.00E+00	0.00E+00	0.00E+00	0.00E+00	0.00E+00	5.64E+03	7.22E+02	1.40E+02	5.64E+03	1.10E+03
0.00E+00	0.00E+00	0.00E+00	5.66E+03	6.72E+02	9.87E+01	0.00E+00	0.00E+00	0.00E+00	0.00E+00	0.00E+00	0.00E+00	0.00E+00	0.00E+00	0.00E+00	0.00E+00	0.00E+00	0.00E+00	0.00E+00	0.00E+00	0.00E+00	0.00E+00	0.00E+00	0.00E+00	5.66E+03	7.61E+01	2.73E+02	0.00E+00	0.00E+00	0.00E+00	0.00E+00	0.00E+00	0.00E+00	5.66E+03	6.87E+02	1.37E+02	0.00E+00	0.00E+00	0.00E+00	0.00E+00	0.00E+00	0.00E+00	0.00E+00	0.00E+00	0.00E+00	5.66E+03	7.21E+02	1.32E+02	5.66E+03	1.11E+03
0.00E+00	0.00E+00	0.00E+00	5.67E+03	6.73E+02	9.69E+01	0.00E+00	0.00E+00	0.00E+00	0.00E+00	0.00E+00	0.00E+00	0.00E+00	0.00E+00	0.00E+00	0.00E+00	0.00E+00	0.00E+00	0.00E+00	0.00E+00	0.00E+00	0.00E+00	0.00E+00	0.00E+00	5.67E+03	7.42E+01	2.63E+02	0.00E+00	0.00E+00	0.00E+00	0.00E+00	0.00E+00	0.00E+00	5.67E+03	6.91E+02	1.42E+02	0.00E+00	0.00E+00	0.00E+00	0.00E+00	0.00E+00	0.00E+00	0.00E+00	0.00E+00	0.00E+00	5.67E+03	7.28E+02	1.27E+02	5.67E+03	1.11E+03
0.00E+00	0.00E+00	0.00E+00	5.69E+03	6.75E+02	9.84E+01	0.00E+00	0.00E+00	0.00E+00	0.00E+00	0.00E+00	0.00E+00	0.00E+00	0.00E+00	0.00E+00	0.00E+00	0.00E+00	0.00E+00	0.00E+00	0.00E+00	0.00E+00	0.00E+00	0.00E+00	0.00E+00	5.69E+03	7.27E+01	2.57E+02	0.00E+00	0.00E+00	0.00E+00	0.00E+00	0.00E+00	0.00E+00	5.69E+03	6.97E+02	1.47E+02	0.00E+00	0.00E+00	0.00E+00	0.00E+00	0.00E+00	0.00E+00	0.00E+00	0.00E+00	0.00E+00	5.69E+03	7.35E+02	1.25E+02	5.69E+03	1.12E+03
0.00E+00	0.00E+00	0.00E+00	5.70E+03	6.74E+02	9.65E+01	0.00E+00	0.00E+00	0.00E+00	0.00E+00	0.00E+00	0.00E+00	0.00E+00	0.00E+00	0.00E+00	0.00E+00	0.00E+00	0.00E+00	0.00E+00	0.00E+00	0.00E+00	0.00E+00	0.00E+00	0.00E+00	5.70E+03	6.91E+01	2.56E+02	0.00E+00	0.00E+00	0.00E+00	0.00E+00	0.00E+00	0.00E+00	5.70E+03	7.03E+02	1.55E+02	0.00E+00	0.00E+00	0.00E+00	0.00E+00	0.00E+00	0.00E+00	0.00E+00	0.00E+00	0.00E+00	5.70E+03	7.41E+02	1.26E+02	5.70E+03	1.12E+03
0.00E+00	0.00E+00	0.00E+00	5.72E+03	6.74E+02	9.41E+01	0.00E+00	0.00E+00	0.00E+00	0.00E+00	0.00E+00	0.00E+00	0.00E+00	0.00E+00	0.00E+00	0.00E+00	0.00E+00	0.00E+00	0.00E+00	0.00E+00	0.00E+00	0.00E+00	0.00E+00	0.00E+00	5.72E+03	6.49E+01	2.55E+02	0.00E+00	0.00E+00	0.00E+00	0.00E+00	0.00E+00	0.00E+00	5.72E+03	7.09E+02	1.56E+02	0.00E+00	0.00E+00	0.00E+00	0.00E+00	0.00E+00	0.00E+00	0.00E+00	0.00E+00	0.00E+00	5.72E+03	7.44E+02	1.29E+02	5.72E+03	1.12E+03
0.00E+00	0.00E+00	0.00E+00	5.73E+03	6.74E+02	8.61E+01	0.00E+00	0.00E+00	0.00E+00	0.00E+00	0.00E+00	0.00E+00	0.00E+00	0.00E+00	0.00E+00	0.00E+00	0.00E+00	0.00E+00	0.00E+00	0.00E+00	0.00E+00	0.00E+00	0.00E+00	0.00E+00	5.73E+03	6.28E+01	2.55E+02	0.00E+00	0.00E+00	0.00E+00	0.00E+00	0.00E+00	0.00E+00	5.73E+03	7.14E+02	1.55E+02	0.00E+00	0.00E+00	0.00E+00	0.00E+00	0.00E+00	0.00E+00	0.00E+00	0.00E+00	0.00E+00	5.73E+03	7.41E+02	1.36E+02	5.73E+03	1.12E+03
0.00E+00	0.00E+00	0.00E+00	5.75E+03	6.75E+02	8.18E+01	0.00E+00	0.00E+00	0.00E+00	0.00E+00	0.00E+00	0.00E+00	0.00E+00	0.00E+00	0.00E+00	0.00E+00	0.00E+00	0.00E+00	0.00E+00	0.00E+00	0.00E+00	0.00E+00	0.00E+00	0.00E+00	5.75E+03	5.76E+01	2.54E+02	0.00E+00	0.00E+00	0.00E+00	0.00E+00	0.00E+00	0.00E+00	5.75E+03	7.19E+02	1.53E+02	0.00E+00	0.00E+00	0.00E+00	0.00E+00	0.00E+00	0.00E+00	0.00E+00	0.00E+00	0.00E+00	5.75E+03	7.40E+02	1.41E+02	5.75E+03	1.12E+03
0.00E+00	0.00E+00	0.00E+00	5.76E+03	6.82E+02	8.16E+01	0.00E+00	0.00E+00	0.00E+00	0.00E+00	0.00E+00	0.00E+00	0.00E+00	0.00E+00	0.00E+00	0.00E+00	0.00E+00	0.00E+00	0.00E+00	0.00E+00	0.00E+00	0.00E+00	0.00E+00	0.00E+00	5.76E+03	5.35E+01	2.53E+02	0.00E+00	0.00E+00	0.00E+00	0.00E+00	0.00E+00	0.00E+00	5.76E+03	7.21E+02	1.47E+02	0.00E+00	0.00E+00	0.00E+00	0.00E+00	0.00E+00	0.00E+00	0.00E+00	0.00E+00	0.00E+00	5.76E+03	7.40E+02	1.47E+02	5.76E+03	1.13E+03
0.00E+00	0.00E+00	0.00E+00	5.78E+03	6.86E+02	8.07E+01	0.00E+00	0.00E+00	0.00E+00	0.00E+00	0.00E+00	0.00E+00	0.00E+00	0.00E+00	0.00E+00	0.00E+00	0.00E+00	0.00E+00	0.00E+00	0.00E+00	0.00E+00	0.00E+00	0.00E+00	0.00E+00	5.78E+03	4.49E+01	2.51E+02	0.00E+00	0.00E+00	0.00E+00	0.00E+00	0.00E+00	0.00E+00	5.78E+03	7.24E+02	1.42E+02	0.00E+00	0.00E+00	0.00E+00	0.00E+00	0.00E+00	0.00E+00	0.00E+00	0.00E+00	0.00E+00	5.78E+03	7.41E+02	1.51E+02	5.78E+03	1.13E+03
0.00E+00	0.00E+00	0.00E+00	5.79E+03	6.93E+02	8.14E+01	0.00E+00	0.00E+00	0.00E+00	0.00E+00	0.00E+00	0.00E+00	0.00E+00	0.00E+00	0.00E+00	0.00E+00	0.00E+00	0.00E+00	0.00E+00	0.00E+00	0.00E+00	0.00E+00	0.00E+00	0.00E+00	5.79E+03	4.05E+01	2.50E+02	0.00E+00	0.00E+00	0.00E+00	0.00E+00	0.00E+00	0.00E+00	5.79E+03	7.27E+02	1.38E+02	0.00E+00	0.00E+00	0.00E+00	0.00E+00	0.00E+00	0.00E+00	0.00E+00	0.00E+00	0.00E+00	5.79E+03	7.43E+02	1.53E+02	5.79E+03	1.13E+03
0.00E+00	0.00E+00	0.00E+00	5.81E+03	6.97E+02	8.48E+01	0.00E+00	0.00E+00	0.00E+00	0.00E+00	0.00E+00	0.00E+00	0.00E+00	0.00E+00	0.00E+00	0.00E+00	0.00E+00	0.00E+00	0.00E+00	0.00E+00	0.00E+00	0.00E+00	0.00E+00	0.00E+00	5.81E+03	3.67E+01	2.49E+02	0.00E+00	0.00E+00	0.00E+00	0.00E+00	0.00E+00	0.00E+00	5.81E+03	7.26E+02	1.32E+02	0.00E+00	0.00E+00	0.00E+00	0.00E+00	0.00E+00	0.00E+00	0.00E+00	0.00E+00	0.00E+00	5.81E+03	7.46E+02	1.55E+02	5.81E+03	1.14E+03
0.00E+00	0.00E+00	0.00E+00	5.82E+03	6.97E+02	8.66E+01	0.00E+00	0.00E+00	0.00E+00	0.00E+00	0.00E+00	0.00E+00	0.00E+00	0.00E+00	0.00E+00	0.00E+00	0.00E+00	0.00E+00	0.00E+00	0.00E+00	0.00E+00	0.00E+00	0.00E+00	0.00E+00	5.82E+03	3.28E+01	2.45E+02	0.00E+00	0.00E+00	0.00E+00	0.00E+00	0.00E+00	0.00E+00	5.82E+03	7.25E+02	1.27E+02	0.00E+00	0.00E+00	0.00E+00	0.00E+00	0.00E+00	0.00E+00	0.00E+00	0.00E+00	0.00E+00	5.82E+03	7.54E+02	1.59E+02	5.82E+03	1.14E+03
0.00E+00	0.00E+00	0.00E+00	5.84E+03	6.94E+02	9.11E+01	0.00E+00	0.00E+00	0.00E+00	0.00E+00	0.00E+00	0.00E+00	0.00E+00	0.00E+00	0.00E+00	0.00E+00	0.00E+00	0.00E+00	0.00E+00	0.00E+00	0.00E+00	0.00E+00	0.00E+00	0.00E+00	5.84E+03	3.26E+01	2.43E+02	0.00E+00	0.00E+00	0.00E+00	0.00E+00	0.00E+00	0.00E+00	5.84E+03	7.28E+02	1.22E+02	0.00E+00	0.00E+00	0.00E+00	0.00E+00	0.00E+00	0.00E+00	0.00E+00	0.00E+00	0.00E+00	5.84E+03	7.58E+02	1.60E+02	5.84E+03	1.15E+03
0.00E+00	0.00E+00	0.00E+00	5.85E+03	6.92E+02	9.44E+01	0.00E+00	0.00E+00	0.00E+00	0.00E+00	0.00E+00	0.00E+00	0.00E+00	0.00E+00	0.00E+00	0.00E+00	0.00E+00	0.00E+00	0.00E+00	0.00E+00	0.00E+00	0.00E+00	0.00E+00	0.00E+00	5.85E+03	3.38E+01	2.42E+02	0.00E+00	0.00E+00	0.00E+00	0.00E+00	0.00E+00	0.00E+00	5.85E+03	7.33E+02	1.14E+02	0.00E+00	0.00E+00	0.00E+00	0.00E+00	0.00E+00	0.00E+00	0.00E+00	0.00E+00	0.00E+00	5.85E+03	7.59E+02	1.61E+02	5.85E+03	1.15E+03
0.00E+00	0.00E+00	0.00E+00	5.87E+03	6.91E+02	9.77E+01	0.00E+00	0.00E+00	0.00E+00	0.00E+00	0.00E+00	0.00E+00	0.00E+00	0.00E+00	0.00E+00	0.00E+00	0.00E+00	0.00E+00	0.00E+00	0.00E+00	0.00E+00	0.00E+00	0.00E+00	0.00E+00	5.87E+03	3.25E+01	2.43E+02	0.00E+00	0.00E+00	0.00E+00	0.00E+00	0.00E+00	0.00E+00	5.87E+03	7.38E+02	1.09E+02	0.00E+00	0.00E+00	0.00E+00	0.00E+00	0.00E+00	0.00E+00	0.00E+00	0.00E+00	0.00E+00	5.87E+03	7.59E+02	1.65E+02	5.87E+03	1.15E+03
0.00E+00	0.00E+00	0.00E+00	5.88E+03	6.88E+02	1.02E+02	0.00E+00	0.00E+00	0.00E+00	0.00E+00	0.00E+00	0.00E+00	0.00E+00	0.00E+00	0.00E+00	0.00E+00	0.00E+00	0.00E+00	0.00E+00	0.00E+00	0.00E+00	0.00E+00	0.00E+00	0.00E+00	5.88E+03	3.21E+01	2.40E+02	0.00E+00	0.00E+00	0.00E+00	0.00E+00	0.00E+00	0.00E+00	5.88E+03	7.41E+02	1.04E+02	0.00E+00	0.00E+00	0.00E+00	0.00E+00	0.00E+00	0.00E+00	0.00E+00	0.00E+00	0.00E+00	5.88E+03	7.56E+02	1.71E+02	5.88E+03	1.15E+03
0.00E+00	0.00E+00	0.00E+00	5.90E+03	6.87E+02	1.08E+02	0.00E+00	0.00E+00	0.00E+00	0.00E+00	0.00E+00	0.00E+00	0.00E+00	0.00E+00	0.00E+00	0.00E+00	0.00E+00	0.00E+00	0.00E+00	0.00E+00	0.00E+00	0.00E+00	0.00E+00	0.00E+00	5.90E+03	3.19E+01	2.40E+02	0.00E+00	0.00E+00	0.00E+00	0.00E+00	0.00E+00	0.00E+00	5.90E+03	7.43E+02	9.80E+01	0.00E+00	0.00E+00	0.00E+00	0.00E+00	0.00E+00	0.00E+00	0.00E+00	0.00E+00	0.00E+00	5.90E+03	7.54E+02	1.74E+02	5.90E+03	1.16E+03
0.00E+00	0.00E+00	0.00E+00	5.91E+03	6.93E+02	1.13E+02	0.00E+00	0.00E+00	0.00E+00	0.00E+00	0.00E+00	0.00E+00	0.00E+00	0.00E+00	0.00E+00	0.00E+00	0.00E+00	0.00E+00	0.00E+00	0.00E+00	0.00E+00	0.00E+00	0.00E+00	0.00E+00	5.91E+03	2.91E+01	2.35E+02	0.00E+00	0.00E+00	0.00E+00	0.00E+00	0.00E+00	0.00E+00	5.91E+03	7.49E+02	9.41E+01	0.00E+00	0.00E+00	0.00E+00	0.00E+00	0.00E+00	0.00E+00	0.00E+00	0.00E+00	0.00E+00	5.91E+03	7.54E+02	1.75E+02	5.91E+03	1.16E+03
0.00E+00	0.00E+00	0.00E+00	5.93E+03	6.93E+02	1.18E+02	0.00E+00	0.00E+00	0.00E+00	0.00E+00	0.00E+00	0.00E+00	0.00E+00	0.00E+00	0.00E+00	0.00E+00	0.00E+00	0.00E+00	0.00E+00	0.00E+00	0.00E+00	0.00E+00	0.00E+00	0.00E+00	5.93E+03	2.40E+01	2.28E+02	0.00E+00	0.00E+00	0.00E+00	0.00E+00	0.00E+00	0.00E+00	5.93E+03	7.54E+02	9.55E+01	0.00E+00	0.00E+00	0.00E+00	0.00E+00	0.00E+00	0.00E+00	0.00E+00	0.00E+00	0.00E+00	5.93E+03	7.50E+02	1.73E+02	5.93E+03	1.16E+03
0.00E+00	0.00E+00	0.00E+00	5.94E+03	6.89E+02	1.21E+02	0.00E+00	0.00E+00	0.00E+00	0.00E+00	0.00E+00	0.00E+00	0.00E+00	0.00E+00	0.00E+00	0.00E+00	0.00E+00	0.00E+00	0.00E+00	0.00E+00	0.00E+00	0.00E+00	0.00E+00	0.00E+00	5.94E+03	1.96E+01	2.22E+02	0.00E+00	0.00E+00	0.00E+00	0.00E+00	0.00E+00	0.00E+00	5.94E+03	7.55E+02	9.83E+01	0.00E+00	0.00E+00	0.00E+00	0.00E+00	0.00E+00	0.00E+00	0.00E+00	0.00E+00	0.00E+00	5.94E+03	7.49E+02	1.68E+02	5.94E+03	1.16E+03
0.00E+00	0.00E+00	0.00E+00	5.96E+03	6.86E+02	1.23E+02	0.00E+00	0.00E+00	0.00E+00	0.00E+00	0.00E+00	0.00E+00	0.00E+00	0.00E+00	0.00E+00	0.00E+00	0.00E+00	0.00E+00	0.00E+00	0.00E+00	0.00E+00	0.00E+00	0.00E+00	0.00E+00	5.96E+03	1.94E+01	2.17E+02	0.00E+00	0.00E+00	0.00E+00	0.00E+00	0.00E+00	0.00E+00	5.96E+03	7.56E+02	1.04E+02	0.00E+00	0.00E+00	0.00E+00	0.00E+00	0.00E+00	0.00E+00	0.00E+00	0.00E+00	0.00E+00	5.96E+03	7.50E+02	1.66E+02	5.96E+03	1.16E+03
0.00E+00	0.00E+00	0.00E+00	5.97E+03	6.84E+02	1.23E+02	0.00E+00	0.00E+00	0.00E+00	0.00E+00	0.00E+00	0.00E+00	0.00E+00	0.00E+00	0.00E+00	0.00E+00	0.00E+00	0.00E+00	0.00E+00	0.00E+00	0.00E+00	0.00E+00	0.00E+00	0.00E+00	5.97E+03	1.79E+01	2.14E+02	0.00E+00	0.00E+00	0.00E+00	0.00E+00	0.00E+00	0.00E+00	5.97E+03	7.54E+02	1.08E+02	0.00E+00	0.00E+00	0.00E+00	0.00E+00	0.00E+00	0.00E+00	0.00E+00	0.00E+00	0.00E+00	5.97E+03	7.51E+02	1.65E+02	5.97E+03	1.16E+03
0.00E+00	0.00E+00	0.00E+00	5.99E+03	6.82E+02	1.24E+02	0.00E+00	0.00E+00	0.00E+00	0.00E+00	0.00E+00	0.00E+00	0.00E+00	0.00E+00	0.00E+00	0.00E+00	0.00E+00	0.00E+00	0.00E+00	0.00E+00	0.00E+00	0.00E+00	0.00E+00	0.00E+00	5.99E+03	1.17E+01	2.08E+02	0.00E+00	0.00E+00	0.00E+00	0.00E+00	0.00E+00	0.00E+00	5.99E+03	7.50E+02	1.13E+02	0.00E+00	0.00E+00	0.00E+00	0.00E+00	0.00E+00	0.00E+00	0.00E+00	0.00E+00	0.00E+00	5.99E+03	7.51E+02	1.65E+02	5.99E+03	1.16E+03
0.00E+00	0.00E+00	0.00E+00	0.00E+00	0.00E+00	0.00E+00	0.00E+00	0.00E+00	0.00E+00	0.00E+00	0.00E+00	0.00E+00	0.00E+00	0.00E+00	0.00E+00	0.00E+00	0.00E+00	0.00E+00	0.00E+00	0.00E+00	0.00E+00	0.00E+00	0.00E+00	0.00E+00	0.00E+00	0.00E+00	0.00E+00	0.00E+00	0.00E+00	0.00E+00	0.00E+00	0.00E+00	0.00E+00	0.00E+00	0.00E+00	0.00E+00	0.00E+00	0.00E+00	0.00E+00	0.00E+00	0.00E+00	0.00E+00	0.00E+00	0.00E+00	0.00E+00	0.00E+00	0.00E+00	0.00E+00	0.00E+00	0.00E+00
0.00E+00	0.00E+00	0.00E+00	0.00E+00	0.00E+00	0.00E+00	0.00E+00	0.00E+00	0.00E+00	0.00E+00	0.00E+00	0.00E+00	0.00E+00	0.00E+00	0.00E+00	0.00E+00	0.00E+00	0.00E+00	0.00E+00	0.00E+00	0.00E+00	0.00E+00	0.00E+00	0.00E+00	0.00E+00	0.00E+00	0.00E+00	0.00E+00	0.00E+00	0.00E+00	0.00E+00	0.00E+00	0.00E+00	0.00E+00	0.00E+00	0.00E+00	0.00E+00	0.00E+00	0.00E+00	0.00E+00	0.00E+00	0.00E+00	0.00E+00	0.00E+00	0.00E+00	0.00E+00	0.00E+00	0.00E+00	0.00E+00	0.00E+00
0.00E+00	0.00E+00	0.00E+00	0.00E+00	0.00E+00	0.00E+00	0.00E+00	0.00E+00	0.00E+00	0.00E+00	0.00E+00	0.00E+00	0.00E+00	0.00E+00	0.00E+00	0.00E+00	0.00E+00	0.00E+00	0.00E+00	0.00E+00	0.00E+00	0.00E+00	0.00E+00	0.00E+00	0.00E+00	0.00E+00	0.00E+00	0.00E+00	0.00E+00	0.00E+00	0.00E+00	0.00E+00	0.00E+00	0.00E+00	0.00E+00	0.00E+00	0.00E+00	0.00E+00	0.00E+00	0.00E+00	0.00E+00	0.00E+00	0.00E+00	0.00E+00	0.00E+00	0.00E+00	0.00E+00	0.00E+00	0.00E+00	0.00E+00
0.00E+00	0.00E+00	0.00E+00	0.00E+00	0.00E+00	0.00E+00	0.00E+00	0.00E+00	0.00E+00	0.00E+00	0.00E+00	0.00E+00	0.00E+00	0.00E+00	0.00E+00	0.00E+00	0.00E+00	0.00E+00	0.00E+00	0.00E+00	0.00E+00	0.00E+00	0.00E+00	0.00E+00	0.00E+00	0.00E+00	0.00E+00	0.00E+00	0.00E+00	0.00E+00	0.00E+00	0.00E+00	0.00E+00	0.00E+00	0.00E+00	0.00E+00	0.00E+00	0.00E+00	0.00E+00	0.00E+00	0.00E+00	0.00E+00	0.00E+00	0.00E+00	0.00E+00	0.00E+00	0.00E+00	0.00E+00	0.00E+00	0.00E+00
0.00E+00	0.00E+00	0.00E+00	0.00E+00	0.00E+00	0.00E+00	0.00E+00	0.00E+00	0.00E+00	0.00E+00	0.00E+00	0.00E+00	0.00E+00	0.00E+00	0.00E+00	0.00E+00	0.00E+00	0.00E+00	0.00E+00	0.00E+00	0.00E+00	0.00E+00	0.00E+00	0.00E+00	0.00E+00	0.00E+00	0.00E+00	0.00E+00	0.00E+00	0.00E+00	0.00E+00	0.00E+00	0.00E+00	0.00E+00	0.00E+00	0.00E+00	0.00E+00	0.00E+00	0.00E+00	0.00E+00	0.00E+00	0.00E+00	0.00E+00	0.00E+00	0.00E+00	0.00E+00	0.00E+00	0.00E+00	0.00E+00	0.00E+00
0.00E+00	0.00E+00	0.00E+00	0.00E+00	0.00E+00	0.00E+00	0.00E+00	0.00E+00	0.00E+00	0.00E+00	0.00E+00	0.00E+00	0.00E+00	0.00E+00	0.00E+00	0.00E+00	0.00E+00	0.00E+00	0.00E+00	0.00E+00	0.00E+00	0.00E+00	0.00E+00	0.00E+00	0.00E+00	0.00E+00	0.00E+00	0.00E+00	0.00E+00	0.00E+00	0.00E+00	0.00E+00	0.00E+00	0.00E+00	0.00E+00	0.00E+00	0.00E+00	0.00E+00	0.00E+00	0.00E+00	0.00E+00	0.00E+00	0.00E+00	0.00E+00	0.00E+00	0.00E+00	0.00E+00	0.00E+00	0.00E+00	0.00E+00
0.00E+00	0.00E+00	0.00E+00	0.00E+00	0.00E+00	0.00E+00	0.00E+00	0.00E+00	0.00E+00	0.00E+00	0.00E+00	0.00E+00	0.00E+00	0.00E+00	0.00E+00	0.00E+00	0.00E+00	0.00E+00	0.00E+00	0.00E+00	0.00E+00	0.00E+00	0.00E+00	0.00E+00	0.00E+00	0.00E+00	0.00E+00	0.00E+00	0.00E+00	0.00E+00	0.00E+00	0.00E+00	0.00E+00	0.00E+00	0.00E+00	0.00E+00	0.00E+00	0.00E+00	0.00E+00	0.00E+00	0.00E+00	0.00E+00	0.00E+00	0.00E+00	0.00E+00	0.00E+00	0.00E+00	0.00E+00	0.00E+00	0.00E+00
0.00E+00	0.00E+00	0.00E+00	0.00E+00	0.00E+00	0.00E+00	0.00E+00	0.00E+00	0.00E+00	0.00E+00	0.00E+00	0.00E+00	0.00E+00	0.00E+00	0.00E+00	0.00E+00	0.00E+00	0.00E+00	0.00E+00	0.00E+00	0.00E+00	0.00E+00	0.00E+00	0.00E+00	0.00E+00	0.00E+00	0.00E+00	0.00E+00	0.00E+00	0.00E+00	0.00E+00	0.00E+00	0.00E+00	0.00E+00	0.00E+00	0.00E+00	0.00E+00	0.00E+00	0.00E+00	0.00E+00	0.00E+00	0.00E+00	0.00E+00	0.00E+00	0.00E+00	0.00E+00	0.00E+00	0.00E+00	0.00E+00	0.00E+00
0.00E+00	0.00E+00	0.00E+00	0.00E+00	0.00E+00	0.00E+00	0.00E+00	0.00E+00	0.00E+00	0.00E+00	0.00E+00	0.00E+00	0.00E+00	0.00E+00	0.00E+00	0.00E+00	0.00E+00	0.00E+00	0.00E+00	0.00E+00	0.00E+00	0.00E+00	0.00E+00	0.00E+00	0.00E+00	0.00E+00	0.00E+00	0.00E+00	0.00E+00	0.00E+00	0.00E+00	0.00E+00	0.00E+00	0.00E+00	0.00E+00	0.00E+00	0.00E+00	0.00E+00	0.00E+00	0.00E+00	0.00E+00	0.00E+00	0.00E+00	0.00E+00	0.00E+00	0.00E+00	0.00E+00	0.00E+00	0.00E+00	0.00E+00
0.00E+00	0.00E+00	0.00E+00	0.00E+00	0.00E+00	0.00E+00	0.00E+00	0.00E+00	0.00E+00	0.00E+00	0.00E+00	0.00E+00	0.00E+00	0.00E+00	0.00E+00	0.00E+00	0.00E+00	0.00E+00	0.00E+00	0.00E+00	0.00E+00	0.00E+00	0.00E+00	0.00E+00	0.00E+00	0.00E+00	0.00E+00	0.00E+00	0.00E+00	0.00E+00	0.00E+00	0.00E+00	0.00E+00	0.00E+00	0.00E+00	0.00E+00	0.00E+00	0.00E+00	0.00E+00	0.00E+00	0.00E+00	0.00E+00	0.00E+00	0.00E+00	0.00E+00	0.00E+00	0.00E+00	0.00E+00	0.00E+00	0.00E+00
0.00E+00	0.00E+00	0.00E+00	0.00E+00	0.00E+00	0.00E+00	0.00E+00	0.00E+00	0.00E+00	0.00E+00	0.00E+00	0.00E+00	0.00E+00	0.00E+00	0.00E+00	0.00E+00	0.00E+00	0.00E+00	0.00E+00	0.00E+00	0.00E+00	0.00E+00	0.00E+00	0.00E+00	0.00E+00	0.00E+00	0.00E+00	0.00E+00	0.00E+00	0.00E+00	0.00E+00	0.00E+00	0.00E+00	0.00E+00	0.00E+00	0.00E+00	0.00E+00	0.00E+00	0.00E+00	0.00E+00	0.00E+00	0.00E+00	0.00E+00	0.00E+00	0.00E+00	0.00E+00	0.00E+00	0.00E+00	0.00E+00	0.00E+00
0.00E+00	0.00E+00	0.00E+00	0.00E+00	0.00E+00	0.00E+00	0.00E+00	0.00E+00	0.00E+00	0.00E+00	0.00E+00	0.00E+00	0.00E+00	0.00E+00	0.00E+00	0.00E+00	0.00E+00	0.00E+00	0.00E+00	0.00E+00	0.00E+00	0.00E+00	0.00E+00	0.00E+00	0.00E+00	0.00E+00	0.00E+00	0.00E+00	0.00E+00	0.00E+00	0.00E+00	0.00E+00	0.00E+00	0.00E+00	0.00E+00	0.00E+00	0.00E+00	0.00E+00	0.00E+00	0.00E+00	0.00E+00	0.00E+00	0.00E+00	0.00E+00	0.00E+00	0.00E+00	0.00E+00	0.00E+00	0.00E+00	0.00E+00
0.00E+00	0.00E+00	0.00E+00	0.00E+00	0.00E+00	0.00E+00	0.00E+00	0.00E+00	0.00E+00	0.00E+00	0.00E+00	0.00E+00	0.00E+00	0.00E+00	0.00E+00	0.00E+00	0.00E+00	0.00E+00	0.00E+00	0.00E+00	0.00E+00	0.00E+00	0.00E+00	0.00E+00	0.00E+00	0.00E+00	0.00E+00	0.00E+00	0.00E+00	0.00E+00	0.00E+00	0.00E+00	0.00E+00	0.00E+00	0.00E+00	0.00E+00	0.00E+00	0.00E+00	0.00E+00	0.00E+00	0.00E+00	0.00E+00	0.00E+00	0.00E+00	0.00E+00	0.00E+00	0.00E+00	0.00E+00	0.00E+00	0.00E+00
0.00E+00	0.00E+00	0.00E+00	0.00E+00	0.00E+00	0.00E+00	0.00E+00	0.00E+00	0.00E+00	0.00E+00	0.00E+00	0.00E+00	0.00E+00	0.00E+00	0.00E+00	0.00E+00	0.00E+00	0.00E+00	0.00E+00	0.00E+00	0.00E+00	0.00E+00	0.00E+00	0.00E+00	0.00E+00	0.00E+00	0.00E+00	0.00E+00	0.00E+00	0.00E+00	0.00E+00	0.00E+00	0.00E+00	0.00E+00	0.00E+00	0.00E+00	0.00E+00	0.00E+00	0.00E+00	0.00E+00	0.00E+00	0.00E+00	0.00E+00	0.00E+00	0.00E+00	0.00E+00	0.00E+00	0.00E+00	0.00E+00	0.00E+00
0.00E+00	0.00E+00	0.00E+00	0.00E+00	0.00E+00	0.00E+00	0.00E+00	0.00E+00	0.00E+00	0.00E+00	0.00E+00	0.00E+00	0.00E+00	0.00E+00	0.00E+00	0.00E+00	0.00E+00	0.00E+00	0.00E+00	0.00E+00	0.00E+00	0.00E+00	0.00E+00	0.00E+00	0.00E+00	0.00E+00	0.00E+00	0.00E+00	0.00E+00	0.00E+00	0.00E+00	0.00E+00	0.00E+00	0.00E+00	0.00E+00	0.00E+00	0.00E+00	0.00E+00	0.00E+00	0.00E+00	0.00E+00	0.00E+00	0.00E+00	0.00E+00	0.00E+00	0.00E+00	0.00E+00	0.00E+00	0.00E+00	0.00E+00
0.00E+00	0.00E+00	0.00E+00	0.00E+00	0.00E+00	0.00E+00	0.00E+00	0.00E+00	0.00E+00	0.00E+00	0.00E+00	0.00E+00	0.00E+00	0.00E+00	0.00E+00	0.00E+00	0.00E+00	0.00E+00	0.00E+00	0.00E+00	0.00E+00	0.00E+00	0.00E+00	0.00E+00	0.00E+00	0.00E+00	0.00E+00	0.00E+00	0.00E+00	0.00E+00	0.00E+00	0.00E+00	0.00E+00	0.00E+00	0.00E+00	0.00E+00	0.00E+00	0.00E+00	0.00E+00	0.00E+00	0.00E+00	0.00E+00	0.00E+00	0.00E+00	0.00E+00	0.00E+00	0.00E+00	0.00E+00	0.00E+00	0.00E+00
0.00E+00	0.00E+00	0.00E+00	0.00E+00	0.00E+00	0.00E+00	0.00E+00	0.00E+00	0.00E+00	0.00E+00	0.00E+00	0.00E+00	0.00E+00	0.00E+00	0.00E+00	0.00E+00	0.00E+00	0.00E+00	0.00E+00	0.00E+00	0.00E+00	0.00E+00	0.00E+00	0.00E+00	0.00E+00	0.00E+00	0.00E+00	0.00E+00	0.00E+00	0.00E+00	0.00E+00	0.00E+00	0.00E+00	0.00E+00	0.00E+00	0.00E+00	0.00E+00	0.00E+00	0.00E+00	0.00E+00	0.00E+00	0.00E+00	0.00E+00	0.00E+00	0.00E+00	0.00E+00	0.00E+00	0.00E+00	0.00E+00	0.00E+00
0.00E+00	0.00E+00	0.00E+00	0.00E+00	0.00E+00	0.00E+00	0.00E+00	0.00E+00	0.00E+00	0.00E+00	0.00E+00	0.00E+00	0.00E+00	0.00E+00	0.00E+00	0.00E+00	0.00E+00	0.00E+00	0.00E+00	0.00E+00	0.00E+00	0.00E+00	0.00E+00	0.00E+00	0.00E+00	0.00E+00	0.00E+00	0.00E+00	0.00E+00	0.00E+00	0.00E+00	0.00E+00	0.00E+00	0.00E+00	0.00E+00	0.00E+00	0.00E+00	0.00E+00	0.00E+00	0.00E+00	0.00E+00	0.00E+00	0.00E+00	0.00E+00	0.00E+00	0.00E+00	0.00E+00	0.00E+00	0.00E+00	0.00E+00
0.00E+00	0.00E+00	0.00E+00	0.00E+00	0.00E+00	0.00E+00	0.00E+00	0.00E+00	0.00E+00	0.00E+00	0.00E+00	0.00E+00	0.00E+00	0.00E+00	0.00E+00	0.00E+00	0.00E+00	0.00E+00	0.00E+00	0.00E+00	0.00E+00	0.00E+00	0.00E+00	0.00E+00	0.00E+00	0.00E+00	0.00E+00	0.00E+00	0.00E+00	0.00E+00	0.00E+00	0.00E+00	0.00E+00	0.00E+00	0.00E+00	0.00E+00	0.00E+00	0.00E+00	0.00E+00	0.00E+00	0.00E+00	0.00E+00	0.00E+00	0.00E+00	0.00E+00	0.00E+00	0.00E+00	0.00E+00	0.00E+00	0.00E+00
0.00E+00	0.00E+00	0.00E+00	0.00E+00	0.00E+00	0.00E+00	0.00E+00	0.00E+00	0.00E+00	0.00E+00	0.00E+00	0.00E+00	0.00E+00	0.00E+00	0.00E+00	0.00E+00	0.00E+00	0.00E+00	0.00E+00	0.00E+00	0.00E+00	0.00E+00	0.00E+00	0.00E+00	0.00E+00	0.00E+00	0.00E+00	0.00E+00	0.00E+00	0.00E+00	0.00E+00	0.00E+00	0.00E+00	0.00E+00	0.00E+00	0.00E+00	0.00E+00	0.00E+00	0.00E+00	0.00E+00	0.00E+00	0.00E+00	0.00E+00	0.00E+00	0.00E+00	0.00E+00	0.00E+00	0.00E+00	0.00E+00	0.00E+00
0.00E+00	0.00E+00	0.00E+00	0.00E+00	0.00E+00	0.00E+00	0.00E+00	0.00E+00	0.00E+00	0.00E+00	0.00E+00	0.00E+00	0.00E+00	0.00E+00	0.00E+00	0.00E+00	0.00E+00	0.00E+00	0.00E+00	0.00E+00	0.00E+00	0.00E+00	0.00E+00	0.00E+00	0.00E+00	0.00E+00	0.00E+00	0.00E+00	0.00E+00	0.00E+00	0.00E+00	0.00E+00	0.00E+00	0.00E+00	0.00E+00	0.00E+00	0.00E+00	0.00E+00	0.00E+00	0.00E+00	0.00E+00	0.00E+00	0.00E+00	0.00E+00	0.00E+00	0.00E+00	0.00E+00	0.00E+00	0.00E+00	0.00E+00
0.00E+00	0.00E+00	0.00E+00	0.00E+00	0.00E+00	0.00E+00	0.00E+00	0.00E+00	0.00E+00	0.00E+00	0.00E+00	0.00E+00	0.00E+00	0.00E+00	0.00E+00	0.00E+00	0.00E+00	0.00E+00	0.00E+00	0.00E+00	0.00E+00	0.00E+00	0.00E+00	0.00E+00	0.00E+00	0.00E+00	0.00E+00	0.00E+00	0.00E+00	0.00E+00	0.00E+00	0.00E+00	0.00E+00	0.00E+00	0.00E+00	0.00E+00	0.00E+00	0.00E+00	0.00E+00	0.00E+00	0.00E+00	0.00E+00	0.00E+00	0.00E+00	0.00E+00	0.00E+00	0.00E+00	0.00E+00	0.00E+00	0.00E+00
0.00E+00	0.00E+00	0.00E+00	0.00E+00	0.00E+00	0.00E+00	0.00E+00	0.00E+00	0.00E+00	0.00E+00	0.00E+00	0.00E+00	0.00E+00	0.00E+00	0.00E+00	0.00E+00	0.00E+00	0.00E+00	0.00E+00	0.00E+00	0.00E+00	0.00E+00	0.00E+00	0.00E+00	0.00E+00	0.00E+00	0.00E+00	0.00E+00	0.00E+00	0.00E+00	0.00E+00	0.00E+00	0.00E+00	0.00E+00	0.00E+00	0.00E+00	0.00E+00	0.00E+00	0.00E+00	0.00E+00	0.00E+00	0.00E+00	0.00E+00	0.00E+00	0.00E+00	0.00E+00	0.00E+00	0.00E+00	0.00E+00	0.00E+00
0.00E+00	0.00E+00	0.00E+00	0.00E+00	0.00E+00	0.00E+00	0.00E+00	0.00E+00	0.00E+00	0.00E+00	0.00E+00	0.00E+00	0.00E+00	0.00E+00	0.00E+00	0.00E+00	0.00E+00	0.00E+00	0.00E+00	0.00E+00	0.00E+00	0.00E+00	0.00E+00	0.00E+00	0.00E+00	0.00E+00	0.00E+00	0.00E+00	0.00E+00	0.00E+00	0.00E+00	0.00E+00	0.00E+00	0.00E+00	0.00E+00	0.00E+00	0.00E+00	0.00E+00	0.00E+00	0.00E+00	0.00E+00	0.00E+00	0.00E+00	0.00E+00	0.00E+00	0.00E+00	0.00E+00	0.00E+00	0.00E+00	0.00E+00
0.00E+00	0.00E+00	0.00E+00	0.00E+00	0.00E+00	0.00E+00	0.00E+00	0.00E+00	0.00E+00	0.00E+00	0.00E+00	0.00E+00	0.00E+00	0.00E+00	0.00E+00	0.00E+00	0.00E+00	0.00E+00	0.00E+00	0.00E+00	0.00E+00	0.00E+00	0.00E+00	0.00E+00	0.00E+00	0.00E+00	0.00E+00	0.00E+00	0.00E+00	0.00E+00	0.00E+00	0.00E+00	0.00E+00	0.00E+00	0.00E+00	0.00E+00	0.00E+00	0.00E+00	0.00E+00	0.00E+00	0.00E+00	0.00E+00	0.00E+00	0.00E+00	0.00E+00	0.00E+00	0.00E+00	0.00E+00	0.00E+00	0.00E+00
0.00E+00	0.00E+00	0.00E+00	0.00E+00	0.00E+00	0.00E+00	0.00E+00	0.00E+00	0.00E+00	0.00E+00	0.00E+00	0.00E+00	0.00E+00	0.00E+00	0.00E+00	0.00E+00	0.00E+00	0.00E+00	0.00E+00	0.00E+00	0.00E+00	0.00E+00	0.00E+00	0.00E+00	0.00E+00	0.00E+00	0.00E+00	0.00E+00	0.00E+00	0.00E+00	0.00E+00	0.00E+00	0.00E+00	0.00E+00	0.00E+00	0.00E+00	0.00E+00	0.00E+00	0.00E+00	0.00E+00	0.00E+00	0.00E+00	0.00E+00	0.00E+00	0.00E+00	0.00E+00	0.00E+00	0.00E+00	0.00E+00	0.00E+00
0.00E+00	0.00E+00	0.00E+00	0.00E+00	0.00E+00	0.00E+00	0.00E+00	0.00E+00	0.00E+00	0.00E+00	0.00E+00	0.00E+00	0.00E+00	0.00E+00	0.00E+00	0.00E+00	0.00E+00	0.00E+00	0.00E+00	0.00E+00	0.00E+00	0.00E+00	0.00E+00	0.00E+00	0.00E+00	0.00E+00	0.00E+00	0.00E+00	0.00E+00	0.00E+00	0.00E+00	0.00E+00	0.00E+00	0.00E+00	0.00E+00	0.00E+00	0.00E+00	0.00E+00	0.00E+00	0.00E+00	0.00E+00	0.00E+00	0.00E+00	0.00E+00	0.00E+00	0.00E+00	0.00E+00	0.00E+00	0.00E+00	0.00E+00
0.00E+00	0.00E+00	0.00E+00	0.00E+00	0.00E+00	0.00E+00	0.00E+00	0.00E+00	0.00E+00	0.00E+00	0.00E+00	0.00E+00	0.00E+00	0.00E+00	0.00E+00	0.00E+00	0.00E+00	0.00E+00	0.00E+00	0.00E+00	0.00E+00	0.00E+00	0.00E+00	0.00E+00	0.00E+00	0.00E+00	0.00E+00	0.00E+00	0.00E+00	0.00E+00	0.00E+00	0.00E+00	0.00E+00	0.00E+00	0.00E+00	0.00E+00	0.00E+00	0.00E+00	0.00E+00	0.00E+00	0.00E+00	0.00E+00	0.00E+00	0.00E+00	0.00E+00	0.00E+00	0.00E+00	0.00E+00	0.00E+00	0.00E+00
0.00E+00	0.00E+00	0.00E+00	0.00E+00	0.00E+00	0.00E+00	0.00E+00	0.00E+00	0.00E+00	0.00E+00	0.00E+00	0.00E+00	0.00E+00	0.00E+00	0.00E+00	0.00E+00	0.00E+00	0.00E+00	0.00E+00	0.00E+00	0.00E+00	0.00E+00	0.00E+00	0.00E+00	0.00E+00	0.00E+00	0.00E+00	0.00E+00	0.00E+00	0.00E+00	0.00E+00	0.00E+00	0.00E+00	0.00E+00	0.00E+00	0.00E+00	0.00E+00	0.00E+00	0.00E+00	0.00E+00	0.00E+00	0.00E+00	0.00E+00	0.00E+00	0.00E+00	0.00E+00	0.00E+00	0.00E+00	0.00E+00	0.00E+00
0.00E+00	0.00E+00	0.00E+00	0.00E+00	0.00E+00	0.00E+00	0.00E+00	0.00E+00	0.00E+00	0.00E+00	0.00E+00	0.00E+00	0.00E+00	0.00E+00	0.00E+00	0.00E+00	0.00E+00	0.00E+00	0.00E+00	0.00E+00	0.00E+00	0.00E+00	0.00E+00	0.00E+00	0.00E+00	0.00E+00	0.00E+00	0.00E+00	0.00E+00	0.00E+00	0.00E+00	0.00E+00	0.00E+00	0.00E+00	0.00E+00	0.00E+00	0.00E+00	0.00E+00	0.00E+00	0.00E+00	0.00E+00	0.00E+00	0.00E+00	0.00E+00	0.00E+00	0.00E+00	0.00E+00	0.00E+00	0.00E+00	0.00E+00
0.00E+00	0.00E+00	0.00E+00	0.00E+00	0.00E+00	0.00E+00	0.00E+00	0.00E+00	0.00E+00	0.00E+00	0.00E+00	0.00E+00	0.00E+00	0.00E+00	0.00E+00	0.00E+00	0.00E+00	0.00E+00	0.00E+00	0.00E+00	0.00E+00	0.00E+00	0.00E+00	0.00E+00	0.00E+00	0.00E+00	0.00E+00	0.00E+00	0.00E+00	0.00E+00	0.00E+00	0.00E+00	0.00E+00	0.00E+00	0.00E+00	0.00E+00	0.00E+00	0.00E+00	0.00E+00	0.00E+00	0.00E+00	0.00E+00	0.00E+00	0.00E+00	0.00E+00	0.00E+00	0.00E+00	0.00E+00	0.00E+00	0.00E+00
0.00E+00	0.00E+00	0.00E+00	0.00E+00	0.00E+00	0.00E+00	0.00E+00	0.00E+00	0.00E+00	0.00E+00	0.00E+00	0.00E+00	0.00E+00	0.00E+00	0.00E+00	0.00E+00	0.00E+00	0.00E+00	0.00E+00	0.00E+00	0.00E+00	0.00E+00	0.00E+00	0.00E+00	0.00E+00	0.00E+00	0.00E+00	0.00E+00	0.00E+00	0.00E+00	0.00E+00	0.00E+00	0.00E+00	0.00E+00	0.00E+00	0.00E+00	0.00E+00	0.00E+00	0.00E+00	0.00E+00	0.00E+00	0.00E+00	0.00E+00	0.00E+00	0.00E+00	0.00E+00	0.00E+00	0.00E+00	0.00E+00	0.00E+00
0.00E+00	0.00E+00	0.00E+00	0.00E+00	0.00E+00	0.00E+00	0.00E+00	0.00E+00	0.00E+00	0.00E+00	0.00E+00	0.00E+00	0.00E+00	0.00E+00	0.00E+00	0.00E+00	0.00E+00	0.00E+00	0.00E+00	0.00E+00	0.00E+00	0.00E+00	0.00E+00	0.00E+00	0.00E+00	0.00E+00	0.00E+00	0.00E+00	0.00E+00	0.00E+00	0.00E+00	0.00E+00	0.00E+00	0.00E+00	0.00E+00	0.00E+00	0.00E+00	0.00E+00	0.00E+00	0.00E+00	0.00E+00	0.00E+00	0.00E+00	0.00E+00	0.00E+00	0.00E+00	0.00E+00	0.00E+00	0.00E+00	0.00E+00
0.00E+00	0.00E+00	0.00E+00	0.00E+00	0.00E+00	0.00E+00	0.00E+00	0.00E+00	0.00E+00	0.00E+00	0.00E+00	0.00E+00	0.00E+00	0.00E+00	0.00E+00	0.00E+00	0.00E+00	0.00E+00	0.00E+00	0.00E+00	0.00E+00	0.00E+00	0.00E+00	0.00E+00	0.00E+00	0.00E+00	0.00E+00	0.00E+00	0.00E+00	0.00E+00	0.00E+00	0.00E+00	0.00E+00	0.00E+00	0.00E+00	0.00E+00	0.00E+00	0.00E+00	0.00E+00	0.00E+00	0.00E+00	0.00E+00	0.00E+00	0.00E+00	0.00E+00	0.00E+00	0.00E+00	0.00E+00	0.00E+00	0.00E+00
0.00E+00	0.00E+00	0.00E+00	0.00E+00	0.00E+00	0.00E+00	0.00E+00	0.00E+00	0.00E+00	0.00E+00	0.00E+00	0.00E+00	0.00E+00	0.00E+00	0.00E+00	0.00E+00	0.00E+00	0.00E+00	0.00E+00	0.00E+00	0.00E+00	0.00E+00	0.00E+00	0.00E+00	0.00E+00	0.00E+00	0.00E+00	0.00E+00	0.00E+00	0.00E+00	0.00E+00	0.00E+00	0.00E+00	0.00E+00	0.00E+00	0.00E+00	0.00E+00	0.00E+00	0.00E+00	0.00E+00	0.00E+00	0.00E+00	0.00E+00	0.00E+00	0.00E+00	0.00E+00	0.00E+00	0.00E+00	0.00E+00	0.00E+00
0.00E+00	0.00E+00	0.00E+00	0.00E+00	0.00E+00	0.00E+00	0.00E+00	0.00E+00	0.00E+00	0.00E+00	0.00E+00	0.00E+00	0.00E+00	0.00E+00	0.00E+00	0.00E+00	0.00E+00	0.00E+00	0.00E+00	0.00E+00	0.00E+00	0.00E+00	0.00E+00	0.00E+00	0.00E+00	0.00E+00	0.00E+00	0.00E+00	0.00E+00	0.00E+00	0.00E+00	0.00E+00	0.00E+00	0.00E+00	0.00E+00	0.00E+00	0.00E+00	0.00E+00	0.00E+00	0.00E+00	0.00E+00	0.00E+00	0.00E+00	0.00E+00	0.00E+00	0.00E+00	0.00E+00	0.00E+00	0.00E+00	0.00E+00
0.00E+00	0.00E+00	0.00E+00	0.00E+00	0.00E+00	0.00E+00	0.00E+00	0.00E+00	0.00E+00	0.00E+00	0.00E+00	0.00E+00	0.00E+00	0.00E+00	0.00E+00	0.00E+00	0.00E+00	0.00E+00	0.00E+00	0.00E+00	0.00E+00	0.00E+00	0.00E+00	0.00E+00	0.00E+00	0.00E+00	0.00E+00	0.00E+00	0.00E+00	0.00E+00	0.00E+00	0.00E+00	0.00E+00	0.00E+00	0.00E+00	0.00E+00	0.00E+00	0.00E+00	0.00E+00	0.00E+00	0.00E+00	0.00E+00	0.00E+00	0.00E+00	0.00E+00	0.00E+00	0.00E+00	0.00E+00	0.00E+00	0.00E+00
0.00E+00	0.00E+00	0.00E+00	0.00E+00	0.00E+00	0.00E+00	0.00E+00	0.00E+00	0.00E+00	0.00E+00	0.00E+00	0.00E+00	0.00E+00	0.00E+00	0.00E+00	0.00E+00	0.00E+00	0.00E+00	0.00E+00	0.00E+00	0.00E+00	0.00E+00	0.00E+00	0.00E+00	0.00E+00	0.00E+00	0.00E+00	0.00E+00	0.00E+00	0.00E+00	0.00E+00	0.00E+00	0.00E+00	0.00E+00	0.00E+00	0.00E+00	0.00E+00	0.00E+00	0.00E+00	0.00E+00	0.00E+00	0.00E+00	0.00E+00	0.00E+00	0.00E+00	0.00E+00	0.00E+00	0.00E+00	0.00E+00	0.00E+00
0.00E+00	0.00E+00	0.00E+00	0.00E+00	0.00E+00	0.00E+00	0.00E+00	0.00E+00	0.00E+00	0.00E+00	0.00E+00	0.00E+00	0.00E+00	0.00E+00	0.00E+00	0.00E+00	0.00E+00	0.00E+00	0.00E+00	0.00E+00	0.00E+00	0.00E+00	0.00E+00	0.00E+00	0.00E+00	0.00E+00	0.00E+00	0.00E+00	0.00E+00	0.00E+00	0.00E+00	0.00E+00	0.00E+00	0.00E+00	0.00E+00	0.00E+00	0.00E+00	0.00E+00	0.00E+00	0.00E+00	0.00E+00	0.00E+00	0.00E+00	0.00E+00	0.00E+00	0.00E+00	0.00E+00	0.00E+00	0.00E+00	0.00E+00
0.00E+00	0.00E+00	0.00E+00	0.00E+00	0.00E+00	0.00E+00	0.00E+00	0.00E+00	0.00E+00	0.00E+00	0.00E+00	0.00E+00	0.00E+00	0.00E+00	0.00E+00	0.00E+00	0.00E+00	0.00E+00	0.00E+00	0.00E+00	0.00E+00	0.00E+00	0.00E+00	0.00E+00	0.00E+00	0.00E+00	0.00E+00	0.00E+00	0.00E+00	0.00E+00	0.00E+00	0.00E+00	0.00E+00	0.00E+00	0.00E+00	0.00E+00	0.00E+00	0.00E+00	0.00E+00	0.00E+00	0.00E+00	0.00E+00	0.00E+00	0.00E+00	0.00E+00	0.00E+00	0.00E+00	0.00E+00	0.00E+00	0.00E+00
0.00E+00	0.00E+00	0.00E+00	0.00E+00	0.00E+00	0.00E+00	0.00E+00	0.00E+00	0.00E+00	0.00E+00	0.00E+00	0.00E+00	0.00E+00	0.00E+00	0.00E+00	0.00E+00	0.00E+00	0.00E+00	0.00E+00	0.00E+00	0.00E+00	0.00E+00	0.00E+00	0.00E+00	0.00E+00	0.00E+00	0.00E+00	0.00E+00	0.00E+00	0.00E+00	0.00E+00	0.00E+00	0.00E+00	0.00E+00	0.00E+00	0.00E+00	0.00E+00	0.00E+00	0.00E+00	0.00E+00	0.00E+00	0.00E+00	0.00E+00	0.00E+00	0.00E+00	0.00E+00	0.00E+00	0.00E+00	0.00E+00	0.00E+00
0.00E+00	0.00E+00	0.00E+00	0.00E+00	0.00E+00	0.00E+00	0.00E+00	0.00E+00	0.00E+00	0.00E+00	0.00E+00	0.00E+00	0.00E+00	0.00E+00	0.00E+00	0.00E+00	0.00E+00	0.00E+00	0.00E+00	0.00E+00	0.00E+00	0.00E+00	0.00E+00	0.00E+00	0.00E+00	0.00E+00	0.00E+00	0.00E+00	0.00E+00	0.00E+00	0.00E+00	0.00E+00	0.00E+00	0.00E+00	0.00E+00	0.00E+00	0.00E+00	0.00E+00	0.00E+00	0.00E+00	0.00E+00	0.00E+00	0.00E+00	0.00E+00	0.00E+00	0.00E+00	0.00E+00	0.00E+00	0.00E+00	0.00E+00
0.00E+00	0.00E+00	0.00E+00	0.00E+00	0.00E+00	0.00E+00	0.00E+00	0.00E+00	0.00E+00	0.00E+00	0.00E+00	0.00E+00	0.00E+00	0.00E+00	0.00E+00	0.00E+00	0.00E+00	0.00E+00	0.00E+00	0.00E+00	0.00E+00	0.00E+00	0.00E+00	0.00E+00	0.00E+00	0.00E+00	0.00E+00	0.00E+00	0.00E+00	0.00E+00	0.00E+00	0.00E+00	0.00E+00	0.00E+00	0.00E+00	0.00E+00	0.00E+00	0.00E+00	0.00E+00	0.00E+00	0.00E+00	0.00E+00	0.00E+00	0.00E+00	0.00E+00	0.00E+00	0.00E+00	0.00E+00	0.00E+00	0.00E+00
0.00E+00	0.00E+00	0.00E+00	0.00E+00	0.00E+00	0.00E+00	0.00E+00	0.00E+00	0.00E+00	0.00E+00	0.00E+00	0.00E+00	0.00E+00	0.00E+00	0.00E+00	0.00E+00	0.00E+00	0.00E+00	0.00E+00	0.00E+00	0.00E+00	0.00E+00	0.00E+00	0.00E+00	0.00E+00	0.00E+00	0.00E+00	0.00E+00	0.00E+00	0.00E+00	0.00E+00	0.00E+00	0.00E+00	0.00E+00	0.00E+00	0.00E+00	0.00E+00	0.00E+00	0.00E+00	0.00E+00	0.00E+00	0.00E+00	0.00E+00	0.00E+00	0.00E+00	0.00E+00	0.00E+00	0.00E+00	0.00E+00	0.00E+00
0.00E+00	0.00E+00	0.00E+00	0.00E+00	0.00E+00	0.00E+00	0.00E+00	0.00E+00	0.00E+00	0.00E+00	0.00E+00	0.00E+00	0.00E+00	0.00E+00	0.00E+00	0.00E+00	0.00E+00	0.00E+00	0.00E+00	0.00E+00	0.00E+00	0.00E+00	0.00E+00	0.00E+00	0.00E+00	0.00E+00	0.00E+00	0.00E+00	0.00E+00	0.00E+00	0.00E+00	0.00E+00	0.00E+00	0.00E+00	0.00E+00	0.00E+00	0.00E+00	0.00E+00	0.00E+00	0.00E+00	0.00E+00	0.00E+00	0.00E+00	0.00E+00	0.00E+00	0.00E+00	0.00E+00	0.00E+00	0.00E+00	0.00E+00
0.00E+00	0.00E+00	0.00E+00	0.00E+00	0.00E+00	0.00E+00	0.00E+00	0.00E+00	0.00E+00	0.00E+00	0.00E+00	0.00E+00	0.00E+00	0.00E+00	0.00E+00	0.00E+00	0.00E+00	0.00E+00	0.00E+00	0.00E+00	0.00E+00	0.00E+00	0.00E+00	0.00E+00	0.00E+00	0.00E+00	0.00E+00	0.00E+00	0.00E+00	0.00E+00	0.00E+00	0.00E+00	0.00E+00	0.00E+00	0.00E+00	0.00E+00	0.00E+00	0.00E+00	0.00E+00	0.00E+00	0.00E+00	0.00E+00	0.00E+00	0.00E+00	0.00E+00	0.00E+00	0.00E+00	0.00E+00	0.00E+00	0.00E+00
0.00E+00	0.00E+00	0.00E+00	0.00E+00	0.00E+00	0.00E+00	0.00E+00	0.00E+00	0.00E+00	0.00E+00	0.00E+00	0.00E+00	0.00E+00	0.00E+00	0.00E+00	0.00E+00	0.00E+00	0.00E+00	0.00E+00	0.00E+00	0.00E+00	0.00E+00	0.00E+00	0.00E+00	0.00E+00	0.00E+00	0.00E+00	0.00E+00	0.00E+00	0.00E+00	0.00E+00	0.00E+00	0.00E+00	0.00E+00	0.00E+00	0.00E+00	0.00E+00	0.00E+00	0.00E+00	0.00E+00	0.00E+00	0.00E+00	0.00E+00	0.00E+00	0.00E+00	0.00E+00	0.00E+00	0.00E+00	0.00E+00	0.00E+00
0.00E+00	0.00E+00	0.00E+00	0.00E+00	0.00E+00	0.00E+00	0.00E+00	0.00E+00	0.00E+00	0.00E+00	0.00E+00	0.00E+00	0.00E+00	0.00E+00	0.00E+00	0.00E+00	0.00E+00	0.00E+00	0.00E+00	0.00E+00	0.00E+00	0.00E+00	0.00E+00	0.00E+00	0.00E+00	0.00E+00	0.00E+00	0.00E+00	0.00E+00	0.00E+00	0.00E+00	0.00E+00	0.00E+00	0.00E+00	0.00E+00	0.00E+00	0.00E+00	0.00E+00	0.00E+00	0.00E+00	0.00E+00	0.00E+00	0.00E+00	0.00E+00	0.00E+00	0.00E+00	0.00E+00	0.00E+00	0.00E+00	0.00E+00
0.00E+00	0.00E+00	0.00E+00	0.00E+00	0.00E+00	0.00E+00	0.00E+00	0.00E+00	0.00E+00	0.00E+00	0.00E+00	0.00E+00	0.00E+00	0.00E+00	0.00E+00	0.00E+00	0.00E+00	0.00E+00	0.00E+00	0.00E+00	0.00E+00	0.00E+00	0.00E+00	0.00E+00	0.00E+00	0.00E+00	0.00E+00	0.00E+00	0.00E+00	0.00E+00	0.00E+00	0.00E+00	0.00E+00	0.00E+00	0.00E+00	0.00E+00	0.00E+00	0.00E+00	0.00E+00	0.00E+00	0.00E+00	0.00E+00	0.00E+00	0.00E+00	0.00E+00	0.00E+00	0.00E+00	0.00E+00	0.00E+00	0.00E+00
0.00E+00	0.00E+00	0.00E+00	0.00E+00	0.00E+00	0.00E+00	0.00E+00	0.00E+00	0.00E+00	0.00E+00	0.00E+00	0.00E+00	0.00E+00	0.00E+00	0.00E+00	0.00E+00	0.00E+00	0.00E+00	0.00E+00	0.00E+00	0.00E+00	0.00E+00	0.00E+00	0.00E+00	0.00E+00	0.00E+00	0.00E+00	0.00E+00	0.00E+00	0.00E+00	0.00E+00	0.00E+00	0.00E+00	0.00E+00	0.00E+00	0.00E+00	0.00E+00	0.00E+00	0.00E+00	0.00E+00	0.00E+00	0.00E+00	0.00E+00	0.00E+00	0.00E+00	0.00E+00	0.00E+00	0.00E+00	0.00E+00	0.00E+00
0.00E+00	0.00E+00	0.00E+00	0.00E+00	0.00E+00	0.00E+00	0.00E+00	0.00E+00	0.00E+00	0.00E+00	0.00E+00	0.00E+00	0.00E+00	0.00E+00	0.00E+00	0.00E+00	0.00E+00	0.00E+00	0.00E+00	0.00E+00	0.00E+00	0.00E+00	0.00E+00	0.00E+00	0.00E+00	0.00E+00	0.00E+00	0.00E+00	0.00E+00	0.00E+00	0.00E+00	0.00E+00	0.00E+00	0.00E+00	0.00E+00	0.00E+00	0.00E+00	0.00E+00	0.00E+00	0.00E+00	0.00E+00	0.00E+00	0.00E+00	0.00E+00	0.00E+00	0.00E+00	0.00E+00	0.00E+00	0.00E+00	0.00E+00
0.00E+00	0.00E+00	0.00E+00	0.00E+00	0.00E+00	0.00E+00	0.00E+00	0.00E+00	0.00E+00	0.00E+00	0.00E+00	0.00E+00	0.00E+00	0.00E+00	0.00E+00	0.00E+00	0.00E+00	0.00E+00	0.00E+00	0.00E+00	0.00E+00	0.00E+00	0.00E+00	0.00E+00	0.00E+00	0.00E+00	0.00E+00	0.00E+00	0.00E+00	0.00E+00	0.00E+00	0.00E+00	0.00E+00	0.00E+00	0.00E+00	0.00E+00	0.00E+00	0.00E+00	0.00E+00	0.00E+00	0.00E+00	0.00E+00	0.00E+00	0.00E+00	0.00E+00	0.00E+00	0.00E+00	0.00E+00	0.00E+00	0.00E+00
0.00E+00	0.00E+00	0.00E+00	0.00E+00	0.00E+00	0.00E+00	0.00E+00	0.00E+00	0.00E+00	0.00E+00	0.00E+00	0.00E+00	0.00E+00	0.00E+00	0.00E+00	0.00E+00	0.00E+00	0.00E+00	0.00E+00	0.00E+00	0.00E+00	0.00E+00	0.00E+00	0.00E+00	0.00E+00	0.00E+00	0.00E+00	0.00E+00	0.00E+00	0.00E+00	0.00E+00	0.00E+00	0.00E+00	0.00E+00	0.00E+00	0.00E+00	0.00E+00	0.00E+00	0.00E+00	0.00E+00	0.00E+00	0.00E+00	0.00E+00	0.00E+00	0.00E+00	0.00E+00	0.00E+00	0.00E+00	0.00E+00	0.00E+00
0.00E+00	0.00E+00	0.00E+00	0.00E+00	0.00E+00	0.00E+00	0.00E+00	0.00E+00	0.00E+00	0.00E+00	0.00E+00	0.00E+00	0.00E+00	0.00E+00	0.00E+00	0.00E+00	0.00E+00	0.00E+00	0.00E+00	0.00E+00	0.00E+00	0.00E+00	0.00E+00	0.00E+00	0.00E+00	0.00E+00	0.00E+00	0.00E+00	0.00E+00	0.00E+00	0.00E+00	0.00E+00	0.00E+00	0.00E+00	0.00E+00	0.00E+00	0.00E+00	0.00E+00	0.00E+00	0.00E+00	0.00E+00	0.00E+00	0.00E+00	0.00E+00	0.00E+00	0.00E+00	0.00E+00	0.00E+00	0.00E+00	0.00E+00
0.00E+00	0.00E+00	0.00E+00	0.00E+00	0.00E+00	0.00E+00	0.00E+00	0.00E+00	0.00E+00	0.00E+00	0.00E+00	0.00E+00	0.00E+00	0.00E+00	0.00E+00	0.00E+00	0.00E+00	0.00E+00	0.00E+00	0.00E+00	0.00E+00	0.00E+00	0.00E+00	0.00E+00	0.00E+00	0.00E+00	0.00E+00	0.00E+00	0.00E+00	0.00E+00	0.00E+00	0.00E+00	0.00E+00	0.00E+00	0.00E+00	0.00E+00	0.00E+00	0.00E+00	0.00E+00	0.00E+00	0.00E+00	0.00E+00	0.00E+00	0.00E+00	0.00E+00	0.00E+00	0.00E+00	0.00E+00	0.00E+00	0.00E+00
0.00E+00	0.00E+00	0.00E+00	0.00E+00	0.00E+00	0.00E+00	0.00E+00	0.00E+00	0.00E+00	0.00E+00	0.00E+00	0.00E+00	0.00E+00	0.00E+00	0.00E+00	0.00E+00	0.00E+00	0.00E+00	0.00E+00	0.00E+00	0.00E+00	0.00E+00	0.00E+00	0.00E+00	0.00E+00	0.00E+00	0.00E+00	0.00E+00	0.00E+00	0.00E+00	0.00E+00	0.00E+00	0.00E+00	0.00E+00	0.00E+00	0.00E+00	0.00E+00	0.00E+00	0.00E+00	0.00E+00	0.00E+00	0.00E+00	0.00E+00	0.00E+00	0.00E+00	0.00E+00	0.00E+00	0.00E+00	0.00E+00	0.00E+00
0.00E+00	0.00E+00	0.00E+00	0.00E+00	0.00E+00	0.00E+00	0.00E+00	0.00E+00	0.00E+00	0.00E+00	0.00E+00	0.00E+00	0.00E+00	0.00E+00	0.00E+00	0.00E+00	0.00E+00	0.00E+00	0.00E+00	0.00E+00	0.00E+00	0.00E+00	0.00E+00	0.00E+00	0.00E+00	0.00E+00	0.00E+00	0.00E+00	0.00E+00	0.00E+00	0.00E+00	0.00E+00	0.00E+00	0.00E+00	0.00E+00	0.00E+00	0.00E+00	0.00E+00	0.00E+00	0.00E+00	0.00E+00	0.00E+00	0.00E+00	0.00E+00	0.00E+00	0.00E+00	0.00E+00	0.00E+00	0.00E+00	0.00E+00
0.00E+00	0.00E+00	0.00E+00	0.00E+00	0.00E+00	0.00E+00	0.00E+00	0.00E+00	0.00E+00	0.00E+00	0.00E+00	0.00E+00	0.00E+00	0.00E+00	0.00E+00	0.00E+00	0.00E+00	0.00E+00	0.00E+00	0.00E+00	0.00E+00	0.00E+00	0.00E+00	0.00E+00	0.00E+00	0.00E+00	0.00E+00	0.00E+00	0.00E+00	0.00E+00	0.00E+00	0.00E+00	0.00E+00	0.00E+00	0.00E+00	0.00E+00	0.00E+00	0.00E+00	0.00E+00	0.00E+00	0.00E+00	0.00E+00	0.00E+00	0.00E+00	0.00E+00	0.00E+00	0.00E+00	0.00E+00	0.00E+00	0.00E+00
0.00E+00	0.00E+00	0.00E+00	0.00E+00	0.00E+00	0.00E+00	0.00E+00	0.00E+00	0.00E+00	0.00E+00	0.00E+00	0.00E+00	0.00E+00	0.00E+00	0.00E+00	0.00E+00	0.00E+00	0.00E+00	0.00E+00	0.00E+00	0.00E+00	0.00E+00	0.00E+00	0.00E+00	0.00E+00	0.00E+00	0.00E+00	0.00E+00	0.00E+00	0.00E+00	0.00E+00	0.00E+00	0.00E+00	0.00E+00	0.00E+00	0.00E+00	0.00E+00	0.00E+00	0.00E+00	0.00E+00	0.00E+00	0.00E+00	0.00E+00	0.00E+00	0.00E+00	0.00E+00	0.00E+00	0.00E+00	0.00E+00	0.00E+00
0.00E+00	0.00E+00	0.00E+00	0.00E+00	0.00E+00	0.00E+00	0.00E+00	0.00E+00	0.00E+00	0.00E+00	0.00E+00	0.00E+00	0.00E+00	0.00E+00	0.00E+00	0.00E+00	0.00E+00	0.00E+00	0.00E+00	0.00E+00	0.00E+00	0.00E+00	0.00E+00	0.00E+00	0.00E+00	0.00E+00	0.00E+00	0.00E+00	0.00E+00	0.00E+00	0.00E+00	0.00E+00	0.00E+00	0.00E+00	0.00E+00	0.00E+00	0.00E+00	0.00E+00	0.00E+00	0.00E+00	0.00E+00	0.00E+00	0.00E+00	0.00E+00	0.00E+00	0.00E+00	0.00E+00	0.00E+00	0.00E+00	0.00E+00
0.00E+00	0.00E+00	0.00E+00	0.00E+00	0.00E+00	0.00E+00	0.00E+00	0.00E+00	0.00E+00	0.00E+00	0.00E+00	0.00E+00	0.00E+00	0.00E+00	0.00E+00	0.00E+00	0.00E+00	0.00E+00	0.00E+00	0.00E+00	0.00E+00	0.00E+00	0.00E+00	0.00E+00	0.00E+00	0.00E+00	0.00E+00	0.00E+00	0.00E+00	0.00E+00	0.00E+00	0.00E+00	0.00E+00	0.00E+00	0.00E+00	0.00E+00	0.00E+00	0.00E+00	0.00E+00	0.00E+00	0.00E+00	0.00E+00	0.00E+00	0.00E+00	0.00E+00	0.00E+00	0.00E+00	0.00E+00	0.00E+00	0.00E+00
0.00E+00	0.00E+00	0.00E+00	0.00E+00	0.00E+00	0.00E+00	0.00E+00	0.00E+00	0.00E+00	0.00E+00	0.00E+00	0.00E+00	0.00E+00	0.00E+00	0.00E+00	0.00E+00	0.00E+00	0.00E+00	0.00E+00	0.00E+00	0.00E+00	0.00E+00	0.00E+00	0.00E+00	0.00E+00	0.00E+00	0.00E+00	0.00E+00	0.00E+00	0.00E+00	0.00E+00	0.00E+00	0.00E+00	0.00E+00	0.00E+00	0.00E+00	0.00E+00	0.00E+00	0.00E+00	0.00E+00	0.00E+00	0.00E+00	0.00E+00	0.00E+00	0.00E+00	0.00E+00	0.00E+00	0.00E+00	0.00E+00	0.00E+00
0.00E+00	0.00E+00	0.00E+00	0.00E+00	0.00E+00	0.00E+00	0.00E+00	0.00E+00	0.00E+00	0.00E+00	0.00E+00	0.00E+00	0.00E+00	0.00E+00	0.00E+00	0.00E+00	0.00E+00	0.00E+00	0.00E+00	0.00E+00	0.00E+00	0.00E+00	0.00E+00	0.00E+00	0.00E+00	0.00E+00	0.00E+00	0.00E+00	0.00E+00	0.00E+00	0.00E+00	0.00E+00	0.00E+00	0.00E+00	0.00E+00	0.00E+00	0.00E+00	0.00E+00	0.00E+00	0.00E+00	0.00E+00	0.00E+00	0.00E+00	0.00E+00	0.00E+00	0.00E+00	0.00E+00	0.00E+00	0.00E+00	0.00E+00
0.00E+00	0.00E+00	0.00E+00	0.00E+00	0.00E+00	0.00E+00	0.00E+00	0.00E+00	0.00E+00	0.00E+00	0.00E+00	0.00E+00	0.00E+00	0.00E+00	0.00E+00	0.00E+00	0.00E+00	0.00E+00	0.00E+00	0.00E+00	0.00E+00	0.00E+00	0.00E+00	0.00E+00	0.00E+00	0.00E+00	0.00E+00	0.00E+00	0.00E+00	0.00E+00	0.00E+00	0.00E+00	0.00E+00	0.00E+00	0.00E+00	0.00E+00	0.00E+00	0.00E+00	0.00E+00	0.00E+00	0.00E+00	0.00E+00	0.00E+00	0.00E+00	0.00E+00	0.00E+00	0.00E+00	0.00E+00	0.00E+00	0.00E+00
0.00E+00	0.00E+00	0.00E+00	0.00E+00	0.00E+00	0.00E+00	0.00E+00	0.00E+00	0.00E+00	0.00E+00	0.00E+00	0.00E+00	0.00E+00	0.00E+00	0.00E+00	0.00E+00	0.00E+00	0.00E+00	0.00E+00	0.00E+00	0.00E+00	0.00E+00	0.00E+00	0.00E+00	0.00E+00	0.00E+00	0.00E+00	0.00E+00	0.00E+00	0.00E+00	0.00E+00	0.00E+00	0.00E+00	0.00E+00	0.00E+00	0.00E+00	0.00E+00	0.00E+00	0.00E+00	0.00E+00	0.00E+00	0.00E+00	0.00E+00	0.00E+00	0.00E+00	0.00E+00	0.00E+00	0.00E+00	0.00E+00	0.00E+00
0.00E+00	0.00E+00	0.00E+00	0.00E+00	0.00E+00	0.00E+00	0.00E+00	0.00E+00	0.00E+00	0.00E+00	0.00E+00	0.00E+00	0.00E+00	0.00E+00	0.00E+00	0.00E+00	0.00E+00	0.00E+00	0.00E+00	0.00E+00	0.00E+00	0.00E+00	0.00E+00	0.00E+00	0.00E+00	0.00E+00	0.00E+00	0.00E+00	0.00E+00	0.00E+00	0.00E+00	0.00E+00	0.00E+00	0.00E+00	0.00E+00	0.00E+00	0.00E+00	0.00E+00	0.00E+00	0.00E+00	0.00E+00	0.00E+00	0.00E+00	0.00E+00	0.00E+00	0.00E+00	0.00E+00	0.00E+00	0.00E+00	0.00E+00
0.00E+00	0.00E+00	0.00E+00	0.00E+00	0.00E+00	0.00E+00	0.00E+00	0.00E+00	0.00E+00	0.00E+00	0.00E+00	0.00E+00	0.00E+00	0.00E+00	0.00E+00	0.00E+00	0.00E+00	0.00E+00	0.00E+00	0.00E+00	0.00E+00	0.00E+00	0.00E+00	0.00E+00	0.00E+00	0.00E+00	0.00E+00	0.00E+00	0.00E+00	0.00E+00	0.00E+00	0.00E+00	0.00E+00	0.00E+00	0.00E+00	0.00E+00	0.00E+00	0.00E+00	0.00E+00	0.00E+00	0.00E+00	0.00E+00	0.00E+00	0.00E+00	0.00E+00	0.00E+00	0.00E+00	0.00E+00	0.00E+00	0.00E+00
0.00E+00	0.00E+00	0.00E+00	0.00E+00	0.00E+00	0.00E+00	0.00E+00	0.00E+00	0.00E+00	0.00E+00	0.00E+00	0.00E+00	0.00E+00	0.00E+00	0.00E+00	0.00E+00	0.00E+00	0.00E+00	0.00E+00	0.00E+00	0.00E+00	0.00E+00	0.00E+00	0.00E+00	0.00E+00	0.00E+00	0.00E+00	0.00E+00	0.00E+00	0.00E+00	0.00E+00	0.00E+00	0.00E+00	0.00E+00	0.00E+00	0.00E+00	0.00E+00	0.00E+00	0.00E+00	0.00E+00	0.00E+00	0.00E+00	0.00E+00	0.00E+00	0.00E+00	0.00E+00	0.00E+00	0.00E+00	0.00E+00	0.00E+00
0.00E+00	0.00E+00	0.00E+00	0.00E+00	0.00E+00	0.00E+00	0.00E+00	0.00E+00	0.00E+00	0.00E+00	0.00E+00	0.00E+00	0.00E+00	0.00E+00	0.00E+00	0.00E+00	0.00E+00	0.00E+00	0.00E+00	0.00E+00	0.00E+00	0.00E+00	0.00E+00	0.00E+00	0.00E+00	0.00E+00	0.00E+00	0.00E+00	0.00E+00	0.00E+00	0.00E+00	0.00E+00	0.00E+00	0.00E+00	0.00E+00	0.00E+00	0.00E+00	0.00E+00	0.00E+00	0.00E+00	0.00E+00	0.00E+00	0.00E+00	0.00E+00	0.00E+00	0.00E+00	0.00E+00	0.00E+00	0.00E+00	0.00E+00
0.00E+00	0.00E+00	0.00E+00	0.00E+00	0.00E+00	0.00E+00	0.00E+00	0.00E+00	0.00E+00	0.00E+00	0.00E+00	0.00E+00	0.00E+00	0.00E+00	0.00E+00	0.00E+00	0.00E+00	0.00E+00	0.00E+00	0.00E+00	0.00E+00	0.00E+00	0.00E+00	0.00E+00	0.00E+00	0.00E+00	0.00E+00	0.00E+00	0.00E+00	0.00E+00	0.00E+00	0.00E+00	0.00E+00	0.00E+00	0.00E+00	0.00E+00	0.00E+00	0.00E+00	0.00E+00	0.00E+00	0.00E+00	0.00E+00	0.00E+00	0.00E+00	0.00E+00	0.00E+00	0.00E+00	0.00E+00	0.00E+00	0.00E+00
0.00E+00	0.00E+00	0.00E+00	0.00E+00	0.00E+00	0.00E+00	0.00E+00	0.00E+00	0.00E+00	0.00E+00	0.00E+00	0.00E+00	0.00E+00	0.00E+00	0.00E+00	0.00E+00	0.00E+00	0.00E+00	0.00E+00	0.00E+00	0.00E+00	0.00E+00	0.00E+00	0.00E+00	0.00E+00	0.00E+00	0.00E+00	0.00E+00	0.00E+00	0.00E+00	0.00E+00	0.00E+00	0.00E+00	0.00E+00	0.00E+00	0.00E+00	0.00E+00	0.00E+00	0.00E+00	0.00E+00	0.00E+00	0.00E+00	0.00E+00	0.00E+00	0.00E+00	0.00E+00	0.00E+00	0.00E+00	0.00E+00	0.00E+00
0.00E+00	0.00E+00	0.00E+00	0.00E+00	0.00E+00	0.00E+00	0.00E+00	0.00E+00	0.00E+00	0.00E+00	0.00E+00	0.00E+00	0.00E+00	0.00E+00	0.00E+00	0.00E+00	0.00E+00	0.00E+00	0.00E+00	0.00E+00	0.00E+00	0.00E+00	0.00E+00	0.00E+00	0.00E+00	0.00E+00	0.00E+00	0.00E+00	0.00E+00	0.00E+00	0.00E+00	0.00E+00	0.00E+00	0.00E+00	0.00E+00	0.00E+00	0.00E+00	0.00E+00	0.00E+00	0.00E+00	0.00E+00	0.00E+00	0.00E+00	0.00E+00	0.00E+00	0.00E+00	0.00E+00	0.00E+00	0.00E+00	0.00E+00
0.00E+00	0.00E+00	0.00E+00	0.00E+00	0.00E+00	0.00E+00	0.00E+00	0.00E+00	0.00E+00	0.00E+00	0.00E+00	0.00E+00	0.00E+00	0.00E+00	0.00E+00	0.00E+00	0.00E+00	0.00E+00	0.00E+00	0.00E+00	0.00E+00	0.00E+00	0.00E+00	0.00E+00	0.00E+00	0.00E+00	0.00E+00	0.00E+00	0.00E+00	0.00E+00	0.00E+00	0.00E+00	0.00E+00	0.00E+00	0.00E+00	0.00E+00	0.00E+00	0.00E+00	0.00E+00	0.00E+00	0.00E+00	0.00E+00	0.00E+00	0.00E+00	0.00E+00	0.00E+00	0.00E+00	0.00E+00	0.00E+00	0.00E+00
0.00E+00	0.00E+00	0.00E+00	0.00E+00	0.00E+00	0.00E+00	0.00E+00	0.00E+00	0.00E+00	0.00E+00	0.00E+00	0.00E+00	0.00E+00	0.00E+00	0.00E+00	0.00E+00	0.00E+00	0.00E+00	0.00E+00	0.00E+00	0.00E+00	0.00E+00	0.00E+00	0.00E+00	0.00E+00	0.00E+00	0.00E+00	0.00E+00	0.00E+00	0.00E+00	0.00E+00	0.00E+00	0.00E+00	0.00E+00	0.00E+00	0.00E+00	0.00E+00	0.00E+00	0.00E+00	0.00E+00	0.00E+00	0.00E+00	0.00E+00	0.00E+00	0.00E+00	0.00E+00	0.00E+00	0.00E+00	0.00E+00	0.00E+00
0.00E+00	0.00E+00	0.00E+00	0.00E+00	0.00E+00	0.00E+00	0.00E+00	0.00E+00	0.00E+00	0.00E+00	0.00E+00	0.00E+00	0.00E+00	0.00E+00	0.00E+00	0.00E+00	0.00E+00	0.00E+00	0.00E+00	0.00E+00	0.00E+00	0.00E+00	0.00E+00	0.00E+00	0.00E+00	0.00E+00	0.00E+00	0.00E+00	0.00E+00	0.00E+00	0.00E+00	0.00E+00	0.00E+00	0.00E+00	0.00E+00	0.00E+00	0.00E+00	0.00E+00	0.00E+00	0.00E+00	0.00E+00	0.00E+00	0.00E+00	0.00E+00	0.00E+00	0.00E+00	0.00E+00	0.00E+00	0.00E+00	0.00E+00
0.00E+00	0.00E+00	0.00E+00	0.00E+00	0.00E+00	0.00E+00	0.00E+00	0.00E+00	0.00E+00	0.00E+00	0.00E+00	0.00E+00	0.00E+00	0.00E+00	0.00E+00	0.00E+00	0.00E+00	0.00E+00	0.00E+00	0.00E+00	0.00E+00	0.00E+00	0.00E+00	0.00E+00	0.00E+00	0.00E+00	0.00E+00	0.00E+00	0.00E+00	0.00E+00	0.00E+00	0.00E+00	0.00E+00	0.00E+00	0.00E+00	0.00E+00	0.00E+00	0.00E+00	0.00E+00	0.00E+00	0.00E+00	0.00E+00	0.00E+00	0.00E+00	0.00E+00	0.00E+00	0.00E+00	0.00E+00	0.00E+00	0.00E+00
0.00E+00	0.00E+00	0.00E+00	0.00E+00	0.00E+00	0.00E+00	0.00E+00	0.00E+00	0.00E+00	0.00E+00	0.00E+00	0.00E+00	0.00E+00	0.00E+00	0.00E+00	0.00E+00	0.00E+00	0.00E+00	0.00E+00	0.00E+00	0.00E+00	0.00E+00	0.00E+00	0.00E+00	0.00E+00	0.00E+00	0.00E+00	0.00E+00	0.00E+00	0.00E+00	0.00E+00	0.00E+00	0.00E+00	0.00E+00	0.00E+00	0.00E+00	0.00E+00	0.00E+00	0.00E+00	0.00E+00	0.00E+00	0.00E+00	0.00E+00	0.00E+00	0.00E+00	0.00E+00	0.00E+00	0.00E+00	0.00E+00	0.00E+00
0.00E+00	0.00E+00	0.00E+00	0.00E+00	0.00E+00	0.00E+00	0.00E+00	0.00E+00	0.00E+00	0.00E+00	0.00E+00	0.00E+00	0.00E+00	0.00E+00	0.00E+00	0.00E+00	0.00E+00	0.00E+00	0.00E+00	0.00E+00	0.00E+00	0.00E+00	0.00E+00	0.00E+00	0.00E+00	0.00E+00	0.00E+00	0.00E+00	0.00E+00	0.00E+00	0.00E+00	0.00E+00	0.00E+00	0.00E+00	0.00E+00	0.00E+00	0.00E+00	0.00E+00	0.00E+00	0.00E+00	0.00E+00	0.00E+00	0.00E+00	0.00E+00	0.00E+00	0.00E+00	0.00E+00	0.00E+00	0.00E+00	0.00E+00
0.00E+00	0.00E+00	0.00E+00	0.00E+00	0.00E+00	0.00E+00	0.00E+00	0.00E+00	0.00E+00	0.00E+00	0.00E+00	0.00E+00	0.00E+00	0.00E+00	0.00E+00	0.00E+00	0.00E+00	0.00E+00	0.00E+00	0.00E+00	0.00E+00	0.00E+00	0.00E+00	0.00E+00	0.00E+00	0.00E+00	0.00E+00	0.00E+00	0.00E+00	0.00E+00	0.00E+00	0.00E+00	0.00E+00	0.00E+00	0.00E+00	0.00E+00	0.00E+00	0.00E+00	0.00E+00	0.00E+00	0.00E+00	0.00E+00	0.00E+00	0.00E+00	0.00E+00	0.00E+00	0.00E+00	0.00E+00	0.00E+00	0.00E+00
0.00E+00	0.00E+00	0.00E+00	0.00E+00	0.00E+00	0.00E+00	0.00E+00	0.00E+00	0.00E+00	0.00E+00	0.00E+00	0.00E+00	0.00E+00	0.00E+00	0.00E+00	0.00E+00	0.00E+00	0.00E+00	0.00E+00	0.00E+00	0.00E+00	0.00E+00	0.00E+00	0.00E+00	0.00E+00	0.00E+00	0.00E+00	0.00E+00	0.00E+00	0.00E+00	0.00E+00	0.00E+00	0.00E+00	0.00E+00	0.00E+00	0.00E+00	0.00E+00	0.00E+00	0.00E+00	0.00E+00	0.00E+00	0.00E+00	0.00E+00	0.00E+00	0.00E+00	0.00E+00	0.00E+00	0.00E+00	0.00E+00	0.00E+00
0.00E+00	0.00E+00	0.00E+00	0.00E+00	0.00E+00	0.00E+00	0.00E+00	0.00E+00	0.00E+00	0.00E+00	0.00E+00	0.00E+00	0.00E+00	0.00E+00	0.00E+00	0.00E+00	0.00E+00	0.00E+00	0.00E+00	0.00E+00	0.00E+00	0.00E+00	0.00E+00	0.00E+00	0.00E+00	0.00E+00	0.00E+00	0.00E+00	0.00E+00	0.00E+00	0.00E+00	0.00E+00	0.00E+00	0.00E+00	0.00E+00	0.00E+00	0.00E+00	0.00E+00	0.00E+00	0.00E+00	0.00E+00	0.00E+00	0.00E+00	0.00E+00	0.00E+00	0.00E+00	0.00E+00	0.00E+00	0.00E+00	0.00E+00
0.00E+00	0.00E+00	0.00E+00	0.00E+00	0.00E+00	0.00E+00	0.00E+00	0.00E+00	0.00E+00	0.00E+00	0.00E+00	0.00E+00	0.00E+00	0.00E+00	0.00E+00	0.00E+00	0.00E+00	0.00E+00	0.00E+00	0.00E+00	0.00E+00	0.00E+00	0.00E+00	0.00E+00	0.00E+00	0.00E+00	0.00E+00	0.00E+00	0.00E+00	0.00E+00	0.00E+00	0.00E+00	0.00E+00	0.00E+00	0.00E+00	0.00E+00	0.00E+00	0.00E+00	0.00E+00	0.00E+00	0.00E+00	0.00E+00	0.00E+00	0.00E+00	0.00E+00	0.00E+00	0.00E+00	0.00E+00	0.00E+00	0.00E+00
0.00E+00	0.00E+00	0.00E+00	0.00E+00	0.00E+00	0.00E+00	0.00E+00	0.00E+00	0.00E+00	0.00E+00	0.00E+00	0.00E+00	0.00E+00	0.00E+00	0.00E+00	0.00E+00	0.00E+00	0.00E+00	0.00E+00	0.00E+00	0.00E+00	0.00E+00	0.00E+00	0.00E+00	0.00E+00	0.00E+00	0.00E+00	0.00E+00	0.00E+00	0.00E+00	0.00E+00	0.00E+00	0.00E+00	0.00E+00	0.00E+00	0.00E+00	0.00E+00	0.00E+00	0.00E+00	0.00E+00	0.00E+00	0.00E+00	0.00E+00	0.00E+00	0.00E+00	0.00E+00	0.00E+00	0.00E+00	0.00E+00	0.00E+00
0.00E+00	0.00E+00	0.00E+00	0.00E+00	0.00E+00	0.00E+00	0.00E+00	0.00E+00	0.00E+00	0.00E+00	0.00E+00	0.00E+00	0.00E+00	0.00E+00	0.00E+00	0.00E+00	0.00E+00	0.00E+00	0.00E+00	0.00E+00	0.00E+00	0.00E+00	0.00E+00	0.00E+00	0.00E+00	0.00E+00	0.00E+00	0.00E+00	0.00E+00	0.00E+00	0.00E+00	0.00E+00	0.00E+00	0.00E+00	0.00E+00	0.00E+00	0.00E+00	0.00E+00	0.00E+00	0.00E+00	0.00E+00	0.00E+00	0.00E+00	0.00E+00	0.00E+00	0.00E+00	0.00E+00	0.00E+00	0.00E+00	0.00E+00
0.00E+00	0.00E+00	0.00E+00	0.00E+00	0.00E+00	0.00E+00	0.00E+00	0.00E+00	0.00E+00	0.00E+00	0.00E+00	0.00E+00	0.00E+00	0.00E+00	0.00E+00	0.00E+00	0.00E+00	0.00E+00	0.00E+00	0.00E+00	0.00E+00	0.00E+00	0.00E+00	0.00E+00	0.00E+00	0.00E+00	0.00E+00	0.00E+00	0.00E+00	0.00E+00	0.00E+00	0.00E+00	0.00E+00	0.00E+00	0.00E+00	0.00E+00	0.00E+00	0.00E+00	0.00E+00	0.00E+00	0.00E+00	0.00E+00	0.00E+00	0.00E+00	0.00E+00	0.00E+00	0.00E+00	0.00E+00	0.00E+00	0.00E+00
0.00E+00	0.00E+00	0.00E+00	0.00E+00	0.00E+00	0.00E+00	0.00E+00	0.00E+00	0.00E+00	0.00E+00	0.00E+00	0.00E+00	0.00E+00	0.00E+00	0.00E+00	0.00E+00	0.00E+00	0.00E+00	0.00E+00	0.00E+00	0.00E+00	0.00E+00	0.00E+00	0.00E+00	0.00E+00	0.00E+00	0.00E+00	0.00E+00	0.00E+00	0.00E+00	0.00E+00	0.00E+00	0.00E+00	0.00E+00	0.00E+00	0.00E+00	0.00E+00	0.00E+00	0.00E+00	0.00E+00	0.00E+00	0.00E+00	0.00E+00	0.00E+00	0.00E+00	0.00E+00	0.00E+00	0.00E+00	0.00E+00	0.00E+00
0.00E+00	0.00E+00	0.00E+00	0.00E+00	0.00E+00	0.00E+00	0.00E+00	0.00E+00	0.00E+00	0.00E+00	0.00E+00	0.00E+00	0.00E+00	0.00E+00	0.00E+00	0.00E+00	0.00E+00	0.00E+00	0.00E+00	0.00E+00	0.00E+00	0.00E+00	0.00E+00	0.00E+00	0.00E+00	0.00E+00	0.00E+00	0.00E+00	0.00E+00	0.00E+00	0.00E+00	0.00E+00	0.00E+00	0.00E+00	0.00E+00	0.00E+00	0.00E+00	0.00E+00	0.00E+00	0.00E+00	0.00E+00	0.00E+00	0.00E+00	0.00E+00	0.00E+00	0.00E+00	0.00E+00	0.00E+00	0.00E+00	0.00E+00
0.00E+00	0.00E+00	0.00E+00	0.00E+00	0.00E+00	0.00E+00	0.00E+00	0.00E+00	0.00E+00	0.00E+00	0.00E+00	0.00E+00	0.00E+00	0.00E+00	0.00E+00	0.00E+00	0.00E+00	0.00E+00	0.00E+00	0.00E+00	0.00E+00	0.00E+00	0.00E+00	0.00E+00	0.00E+00	0.00E+00	0.00E+00	0.00E+00	0.00E+00	0.00E+00	0.00E+00	0.00E+00	0.00E+00	0.00E+00	0.00E+00	0.00E+00	0.00E+00	0.00E+00	0.00E+00	0.00E+00	0.00E+00	0.00E+00	0.00E+00	0.00E+00	0.00E+00	0.00E+00	0.00E+00	0.00E+00	0.00E+00	0.00E+00
0.00E+00	0.00E+00	0.00E+00	0.00E+00	0.00E+00	0.00E+00	0.00E+00	0.00E+00	0.00E+00	0.00E+00	0.00E+00	0.00E+00	0.00E+00	0.00E+00	0.00E+00	0.00E+00	0.00E+00	0.00E+00	0.00E+00	0.00E+00	0.00E+00	0.00E+00	0.00E+00	0.00E+00	0.00E+00	0.00E+00	0.00E+00	0.00E+00	0.00E+00	0.00E+00	0.00E+00	0.00E+00	0.00E+00	0.00E+00	0.00E+00	0.00E+00	0.00E+00	0.00E+00	0.00E+00	0.00E+00	0.00E+00	0.00E+00	0.00E+00	0.00E+00	0.00E+00	0.00E+00	0.00E+00	0.00E+00	0.00E+00	0.00E+00
0.00E+00	0.00E+00	0.00E+00	0.00E+00	0.00E+00	0.00E+00	0.00E+00	0.00E+00	0.00E+00	0.00E+00	0.00E+00	0.00E+00	0.00E+00	0.00E+00	0.00E+00	0.00E+00	0.00E+00	0.00E+00	0.00E+00	0.00E+00	0.00E+00	0.00E+00	0.00E+00	0.00E+00	0.00E+00	0.00E+00	0.00E+00	0.00E+00	0.00E+00	0.00E+00	0.00E+00	0.00E+00	0.00E+00	0.00E+00	0.00E+00	0.00E+00	0.00E+00	0.00E+00	0.00E+00	0.00E+00	0.00E+00	0.00E+00	0.00E+00	0.00E+00	0.00E+00	0.00E+00	0.00E+00	0.00E+00	0.00E+00	0.00E+00
0.00E+00	0.00E+00	0.00E+00	0.00E+00	0.00E+00	0.00E+00	0.00E+00	0.00E+00	0.00E+00	0.00E+00	0.00E+00	0.00E+00	0.00E+00	0.00E+00	0.00E+00	0.00E+00	0.00E+00	0.00E+00	0.00E+00	0.00E+00	0.00E+00	0.00E+00	0.00E+00	0.00E+00	0.00E+00	0.00E+00	0.00E+00	0.00E+00	0.00E+00	0.00E+00	0.00E+00	0.00E+00	0.00E+00	0.00E+00	0.00E+00	0.00E+00	0.00E+00	0.00E+00	0.00E+00	0.00E+00	0.00E+00	0.00E+00	0.00E+00	0.00E+00	0.00E+00	0.00E+00	0.00E+00	0.00E+00	0.00E+00	0.00E+00
0.00E+00	0.00E+00	0.00E+00	0.00E+00	0.00E+00	0.00E+00	0.00E+00	0.00E+00	0.00E+00	0.00E+00	0.00E+00	0.00E+00	0.00E+00	0.00E+00	0.00E+00	0.00E+00	0.00E+00	0.00E+00	0.00E+00	0.00E+00	0.00E+00	0.00E+00	0.00E+00	0.00E+00	0.00E+00	0.00E+00	0.00E+00	0.00E+00	0.00E+00	0.00E+00	0.00E+00	0.00E+00	0.00E+00	0.00E+00	0.00E+00	0.00E+00	0.00E+00	0.00E+00	0.00E+00	0.00E+00	0.00E+00	0.00E+00	0.00E+00	0.00E+00	0.00E+00	0.00E+00	0.00E+00	0.00E+00	0.00E+00	0.00E+00
0.00E+00	0.00E+00	0.00E+00	0.00E+00	0.00E+00	0.00E+00	0.00E+00	0.00E+00	0.00E+00	0.00E+00	0.00E+00	0.00E+00	0.00E+00	0.00E+00	0.00E+00	0.00E+00	0.00E+00	0.00E+00	0.00E+00	0.00E+00	0.00E+00	0.00E+00	0.00E+00	0.00E+00	0.00E+00	0.00E+00	0.00E+00	0.00E+00	0.00E+00	0.00E+00	0.00E+00	0.00E+00	0.00E+00	0.00E+00	0.00E+00	0.00E+00	0.00E+00	0.00E+00	0.00E+00	0.00E+00	0.00E+00	0.00E+00	0.00E+00	0.00E+00	0.00E+00	0.00E+00	0.00E+00	0.00E+00	0.00E+00	0.00E+00
0.00E+00	0.00E+00	0.00E+00	0.00E+00	0.00E+00	0.00E+00	0.00E+00	0.00E+00	0.00E+00	0.00E+00	0.00E+00	0.00E+00	0.00E+00	0.00E+00	0.00E+00	0.00E+00	0.00E+00	0.00E+00	0.00E+00	0.00E+00	0.00E+00	0.00E+00	0.00E+00	0.00E+00	0.00E+00	0.00E+00	0.00E+00	0.00E+00	0.00E+00	0.00E+00	0.00E+00	0.00E+00	0.00E+00	0.00E+00	0.00E+00	0.00E+00	0.00E+00	0.00E+00	0.00E+00	0.00E+00	0.00E+00	0.00E+00	0.00E+00	0.00E+00	0.00E+00	0.00E+00	0.00E+00	0.00E+00	0.00E+00	0.00E+00
0.00E+00	0.00E+00	0.00E+00	0.00E+00	0.00E+00	0.00E+00	0.00E+00	0.00E+00	0.00E+00	0.00E+00	0.00E+00	0.00E+00	0.00E+00	0.00E+00	0.00E+00	0.00E+00	0.00E+00	0.00E+00	0.00E+00	0.00E+00	0.00E+00	0.00E+00	0.00E+00	0.00E+00	0.00E+00	0.00E+00	0.00E+00	0.00E+00	0.00E+00	0.00E+00	0.00E+00	0.00E+00	0.00E+00	0.00E+00	0.00E+00	0.00E+00	0.00E+00	0.00E+00	0.00E+00	0.00E+00	0.00E+00	0.00E+00	0.00E+00	0.00E+00	0.00E+00	0.00E+00	0.00E+00	0.00E+00	0.00E+00	0.00E+00
0.00E+00	0.00E+00	0.00E+00	0.00E+00	0.00E+00	0.00E+00	0.00E+00	0.00E+00	0.00E+00	0.00E+00	0.00E+00	0.00E+00	0.00E+00	0.00E+00	0.00E+00	0.00E+00	0.00E+00	0.00E+00	0.00E+00	0.00E+00	0.00E+00	0.00E+00	0.00E+00	0.00E+00	0.00E+00	0.00E+00	0.00E+00	0.00E+00	0.00E+00	0.00E+00	0.00E+00	0.00E+00	0.00E+00	0.00E+00	0.00E+00	0.00E+00	0.00E+00	0.00E+00	0.00E+00	0.00E+00	0.00E+00	0.00E+00	0.00E+00	0.00E+00	0.00E+00	0.00E+00	0.00E+00	0.00E+00	0.00E+00	0.00E+00
0.00E+00	0.00E+00	0.00E+00	0.00E+00	0.00E+00	0.00E+00	0.00E+00	0.00E+00	0.00E+00	0.00E+00	0.00E+00	0.00E+00	0.00E+00	0.00E+00	0.00E+00	0.00E+00	0.00E+00	0.00E+00	0.00E+00	0.00E+00	0.00E+00	0.00E+00	0.00E+00	0.00E+00	0.00E+00	0.00E+00	0.00E+00	0.00E+00	0.00E+00	0.00E+00	0.00E+00	0.00E+00	0.00E+00	0.00E+00	0.00E+00	0.00E+00	0.00E+00	0.00E+00	0.00E+00	0.00E+00	0.00E+00	0.00E+00	0.00E+00	0.00E+00	0.00E+00	0.00E+00	0.00E+00	0.00E+00	0.00E+00	0.00E+00
0.00E+00	0.00E+00	0.00E+00	0.00E+00	0.00E+00	0.00E+00	0.00E+00	0.00E+00	0.00E+00	0.00E+00	0.00E+00	0.00E+00	0.00E+00	0.00E+00	0.00E+00	0.00E+00	0.00E+00	0.00E+00	0.00E+00	0.00E+00	0.00E+00	0.00E+00	0.00E+00	0.00E+00	0.00E+00	0.00E+00	0.00E+00	0.00E+00	0.00E+00	0.00E+00	0.00E+00	0.00E+00	0.00E+00	0.00E+00	0.00E+00	0.00E+00	0.00E+00	0.00E+00	0.00E+00	0.00E+00	0.00E+00	0.00E+00	0.00E+00	0.00E+00	0.00E+00	0.00E+00	0.00E+00	0.00E+00	0.00E+00	0.00E+00
0.00E+00	0.00E+00	0.00E+00	0.00E+00	0.00E+00	0.00E+00	0.00E+00	0.00E+00	0.00E+00	0.00E+00	0.00E+00	0.00E+00	0.00E+00	0.00E+00	0.00E+00	0.00E+00	0.00E+00	0.00E+00	0.00E+00	0.00E+00	0.00E+00	0.00E+00	0.00E+00	0.00E+00	0.00E+00	0.00E+00	0.00E+00	0.00E+00	0.00E+00	0.00E+00	0.00E+00	0.00E+00	0.00E+00	0.00E+00	0.00E+00	0.00E+00	0.00E+00	0.00E+00	0.00E+00	0.00E+00	0.00E+00	0.00E+00	0.00E+00	0.00E+00	0.00E+00	0.00E+00	0.00E+00	0.00E+00	0.00E+00	0.00E+00
0.00E+00	0.00E+00	0.00E+00	0.00E+00	0.00E+00	0.00E+00	0.00E+00	0.00E+00	0.00E+00	0.00E+00	0.00E+00	0.00E+00	0.00E+00	0.00E+00	0.00E+00	0.00E+00	0.00E+00	0.00E+00	0.00E+00	0.00E+00	0.00E+00	0.00E+00	0.00E+00	0.00E+00	0.00E+00	0.00E+00	0.00E+00	0.00E+00	0.00E+00	0.00E+00	0.00E+00	0.00E+00	0.00E+00	0.00E+00	0.00E+00	0.00E+00	0.00E+00	0.00E+00	0.00E+00	0.00E+00	0.00E+00	0.00E+00	0.00E+00	0.00E+00	0.00E+00	0.00E+00	0.00E+00	0.00E+00	0.00E+00	0.00E+00
[truncated: 55 more columns]
