# Supplementary material for: Polar pattern formation induced by contact following locomotion in a multicellular system
Source: eLife. 2020 Apr 30;9:e53609. doi: 10.7554/eLife.53609 (PMC7213982; doi:10.7554/eLife.53609)
Supplement: Figure 2—source data 2. [file elife-53609-fig2-data2.csv]

t(s)	x position of band front	x position of band end
1.35E+03	1.67E+03	0.00E+00
1.37E+03	1.66E+03	0.00E+00
1.38E+03	1.65E+03	0.00E+00
1.40E+03	1.65E+03	0.00E+00
1.41E+03	1.64E+03	0.00E+00
1.43E+03	1.63E+03	0.00E+00
1.44E+03	1.62E+03	0.00E+00
1.46E+03	1.61E+03	0.00E+00
1.47E+03	1.61E+03	0.00E+00
1.49E+03	1.60E+03	0.00E+00
1.50E+03	1.59E+03	0.00E+00
1.52E+03	1.58E+03	0.00E+00
1.53E+03	1.57E+03	0.00E+00
1.55E+03	1.56E+03	0.00E+00
1.56E+03	1.56E+03	0.00E+00
1.58E+03	1.55E+03	0.00E+00
1.59E+03	1.54E+03	0.00E+00
1.61E+03	1.53E+03	0.00E+00
1.62E+03	1.52E+03	0.00E+00
1.64E+03	1.51E+03	0.00E+00
1.65E+03	1.51E+03	0.00E+00
1.67E+03	1.50E+03	0.00E+00
1.68E+03	1.49E+03	0.00E+00
1.70E+03	1.48E+03	0.00E+00
1.71E+03	1.47E+03	0.00E+00
1.73E+03	1.47E+03	0.00E+00
1.74E+03	1.46E+03	0.00E+00
1.76E+03	1.45E+03	0.00E+00
1.77E+03	1.44E+03	0.00E+00
1.79E+03	1.43E+03	0.00E+00
1.80E+03	1.42E+03	0.00E+00
1.82E+03	1.42E+03	0.00E+00
1.83E+03	1.41E+03	0.00E+00
1.85E+03	1.40E+03	0.00E+00
1.86E+03	1.39E+03	0.00E+00
1.88E+03	1.38E+03	0.00E+00
1.89E+03	1.38E+03	0.00E+00
1.91E+03	1.37E+03	0.00E+00
1.92E+03	1.36E+03	0.00E+00
1.94E+03	1.35E+03	0.00E+00
1.95E+03	1.34E+03	0.00E+00
1.97E+03	1.33E+03	1.67E+03
1.98E+03	1.33E+03	1.66E+03
2.00E+03	1.32E+03	1.65E+03
2.01E+03	1.31E+03	1.65E+03
2.03E+03	1.30E+03	1.64E+03
2.04E+03	1.29E+03	1.63E+03
2.06E+03	1.28E+03	1.62E+03
2.07E+03	1.28E+03	1.61E+03
2.09E+03	1.27E+03	1.61E+03
2.10E+03	1.26E+03	1.60E+03
2.12E+03	1.25E+03	1.59E+03
2.13E+03	1.24E+03	1.58E+03
2.15E+03	1.24E+03	1.57E+03
2.16E+03	1.23E+03	1.56E+03
2.18E+03	1.22E+03	1.56E+03
2.19E+03	1.21E+03	1.55E+03
2.21E+03	1.20E+03	1.54E+03
2.22E+03	1.19E+03	1.53E+03
2.24E+03	1.19E+03	1.52E+03
2.25E+03	1.18E+03	1.51E+03
2.27E+03	1.17E+03	1.51E+03
2.28E+03	1.16E+03	1.50E+03
2.30E+03	1.15E+03	1.49E+03
2.31E+03	1.14E+03	1.48E+03
2.33E+03	1.14E+03	1.47E+03
2.34E+03	1.13E+03	1.47E+03
2.36E+03	1.12E+03	1.46E+03
2.37E+03	1.11E+03	1.45E+03
2.39E+03	1.10E+03	1.44E+03
2.40E+03	1.10E+03	1.43E+03
2.42E+03	1.09E+03	1.42E+03
2.43E+03	1.08E+03	1.42E+03
2.45E+03	1.07E+03	1.41E+03
2.46E+03	1.06E+03	1.40E+03
2.48E+03	1.05E+03	1.39E+03
2.49E+03	1.05E+03	1.38E+03
2.51E+03	1.04E+03	1.38E+03
2.52E+03	1.03E+03	1.37E+03
2.54E+03	1.02E+03	1.36E+03
2.55E+03	1.01E+03	1.35E+03
2.57E+03	1.00E+03	1.34E+03
2.58E+03	9.96E+02	1.33E+03
2.60E+03	9.88E+02	1.33E+03
2.61E+03	9.80E+02	1.32E+03
2.63E+03	9.72E+02	1.31E+03
2.64E+03	9.63E+02	1.30E+03
2.66E+03	9.55E+02	1.29E+03
2.67E+03	9.47E+02	1.28E+03
2.69E+03	9.39E+02	1.28E+03
2.70E+03	9.30E+02	1.27E+03
2.72E+03	9.22E+02	1.26E+03
2.73E+03	9.14E+02	1.25E+03
2.75E+03	9.06E+02	1.24E+03
2.76E+03	8.97E+02	1.24E+03
2.78E+03	8.89E+02	1.23E+03
2.79E+03	8.81E+02	1.22E+03
2.81E+03	8.73E+02	1.21E+03
2.82E+03	8.65E+02	1.20E+03
2.84E+03	8.56E+02	1.19E+03
2.85E+03	8.48E+02	1.19E+03
2.87E+03	8.40E+02	1.18E+03
2.88E+03	8.32E+02	1.17E+03
2.90E+03	8.23E+02	1.16E+03
2.91E+03	8.15E+02	1.15E+03
2.93E+03	8.07E+02	1.14E+03
2.94E+03	7.99E+02	1.14E+03
2.96E+03	7.90E+02	1.13E+03
2.97E+03	7.82E+02	1.12E+03
2.99E+03	7.74E+02	1.11E+03
3.00E+03	7.66E+02	1.10E+03
3.02E+03	7.57E+02	1.10E+03
3.03E+03	7.49E+02	1.09E+03
3.05E+03	7.41E+02	1.08E+03
3.06E+03	7.33E+02	1.07E+03
3.08E+03	7.25E+02	1.06E+03
3.09E+03	7.16E+02	1.05E+03
3.11E+03	7.08E+02	1.05E+03
3.12E+03	7.00E+02	1.04E+03
3.14E+03	6.92E+02	1.03E+03
3.15E+03	6.83E+02	1.02E+03
3.17E+03	6.75E+02	1.01E+03
3.18E+03	6.67E+02	1.00E+03
3.20E+03	6.59E+02	9.96E+02
3.21E+03	6.50E+02	9.88E+02
3.23E+03	6.42E+02	9.80E+02
3.24E+03	6.34E+02	9.72E+02
3.26E+03	6.26E+02	9.63E+02
3.27E+03	6.18E+02	9.55E+02
3.29E+03	6.09E+02	9.47E+02
3.30E+03	6.01E+02	9.39E+02
3.32E+03	5.93E+02	9.30E+02
3.33E+03	5.85E+02	9.22E+02
3.35E+03	5.76E+02	9.14E+02
3.36E+03	5.68E+02	9.06E+02
3.38E+03	5.60E+02	8.97E+02
3.39E+03	5.52E+02	8.89E+02
3.41E+03	5.43E+02	8.81E+02
3.42E+03	5.35E+02	8.73E+02
3.44E+03	5.27E+02	8.65E+02
3.45E+03	5.19E+02	8.56E+02
3.47E+03	5.10E+02	8.48E+02
3.48E+03	5.02E+02	8.40E+02
3.50E+03	4.94E+02	8.32E+02
3.51E+03	4.86E+02	8.23E+02
3.53E+03	4.78E+02	8.15E+02
3.54E+03	4.69E+02	8.07E+02
3.56E+03	4.61E+02	7.99E+02
3.57E+03	4.53E+02	7.90E+02
3.59E+03	4.45E+02	7.82E+02
3.60E+03	4.36E+02	7.74E+02
3.62E+03	4.28E+02	7.66E+02
3.63E+03	4.20E+02	7.57E+02
3.65E+03	4.12E+02	7.49E+02
3.66E+03	4.03E+02	7.41E+02
3.68E+03	3.95E+02	7.33E+02
3.69E+03	3.87E+02	7.25E+02
3.71E+03	3.79E+02	7.16E+02
3.72E+03	3.71E+02	7.08E+02
3.74E+03	3.62E+02	7.00E+02
3.75E+03	3.54E+02	6.92E+02
3.77E+03	3.46E+02	6.83E+02
3.78E+03	3.38E+02	6.75E+02
3.80E+03	3.29E+02	6.67E+02
3.81E+03	3.21E+02	6.59E+02
3.83E+03	3.13E+02	6.50E+02
3.84E+03	3.05E+02	6.42E+02
3.86E+03	2.96E+02	6.34E+02
3.87E+03	2.88E+02	6.26E+02
3.89E+03	2.80E+02	6.18E+02
3.90E+03	2.72E+02	6.09E+02
3.92E+03	2.63E+02	6.01E+02
3.93E+03	2.55E+02	5.93E+02
3.95E+03	2.47E+02	5.85E+02
3.96E+03	2.39E+02	5.76E+02
3.98E+03	2.31E+02	5.68E+02
3.99E+03	2.22E+02	5.60E+02
4.01E+03	2.14E+02	5.52E+02
4.02E+03	2.06E+02	5.43E+02
4.04E+03	1.98E+02	5.35E+02
4.05E+03	1.89E+02	5.27E+02
4.07E+03	1.81E+02	5.19E+02
4.08E+03	1.73E+02	5.10E+02
4.10E+03	1.65E+02	5.02E+02
4.11E+03	1.56E+02	4.94E+02
4.13E+03	1.48E+02	4.86E+02
4.14E+03	1.40E+02	4.78E+02
4.16E+03	1.32E+02	4.69E+02
4.17E+03	1.24E+02	4.61E+02
4.19E+03	1.15E+02	4.53E+02
4.20E+03	1.07E+02	4.45E+02
4.22E+03	9.88E+01	4.36E+02
4.23E+03	9.06E+01	4.28E+02
4.25E+03	8.23E+01	4.20E+02
4.26E+03	7.41E+01	4.12E+02
4.28E+03	6.59E+01	4.03E+02
4.29E+03	5.76E+01	3.95E+02
4.31E+03	4.94E+01	3.87E+02
4.32E+03	4.12E+01	3.79E+02
4.34E+03	3.29E+01	3.71E+02
4.35E+03	2.47E+01	3.62E+02
4.37E+03	1.65E+01	3.54E+02
4.38E+03	8.23E+00	3.46E+02
4.40E+03	0.00E+00	3.38E+02
4.41E+03	0.00E+00	3.29E+02
4.43E+03	0.00E+00	3.21E+02
4.44E+03	0.00E+00	3.13E+02
4.46E+03	0.00E+00	3.05E+02
4.47E+03	0.00E+00	2.96E+02
4.49E+03	0.00E+00	2.88E+02
4.50E+03	0.00E+00	2.80E+02
4.52E+03	0.00E+00	2.72E+02
4.53E+03	0.00E+00	2.63E+02
4.55E+03	0.00E+00	2.55E+02
4.56E+03	0.00E+00	2.47E+02
4.58E+03	0.00E+00	2.39E+02
4.59E+03	0.00E+00	2.31E+02
4.61E+03	0.00E+00	2.22E+02
4.62E+03	0.00E+00	2.14E+02
4.64E+03	0.00E+00	2.06E+02
4.65E+03	0.00E+00	1.98E+02
4.67E+03	0.00E+00	1.89E+02
4.68E+03	0.00E+00	1.81E+02
4.70E+03	0.00E+00	1.73E+02
4.71E+03	0.00E+00	1.65E+02
4.73E+03	0.00E+00	1.56E+02
4.74E+03	0.00E+00	1.48E+02
4.76E+03	0.00E+00	1.40E+02
4.77E+03	0.00E+00	1.32E+02
4.79E+03	0.00E+00	1.24E+02
4.80E+03	0.00E+00	1.15E+02
4.82E+03	0.00E+00	1.07E+02
4.83E+03	0.00E+00	9.88E+01
4.85E+03	0.00E+00	9.06E+01
4.86E+03	0.00E+00	8.23E+01
4.88E+03	0.00E+00	7.41E+01
4.89E+03	0.00E+00	6.59E+01
4.91E+03	0.00E+00	5.76E+01
4.92E+03	0.00E+00	4.94E+01
4.94E+03	0.00E+00	4.12E+01
4.95E+03	0.00E+00	3.29E+01
4.97E+03	0.00E+00	2.47E+01
4.98E+03	0.00E+00	1.65E+01
5.00E+03	0.00E+00	8.23E+00
