# Supplementary material for: Polar pattern formation induced by contact following locomotion in a multicellular system
Source: eLife. 2020 Apr 30;9:e53609. doi: 10.7554/eLife.53609 (PMC7213982; doi:10.7554/eLife.53609)
Supplement: Figure 4—source data 1. [file elife-53609-fig4-data1.csv]

N	\tau (s)
1	3.00E+02
2	9.00E+01
3	9.00E+01
4	7.50E+01
5	1.20E+02
6	1.05E+02
7	1.50E+02
8	1.05E+02
9	1.80E+02
10	6.00E+01
11	3.00E+02
12	3.00E+02
13	2.55E+02
14	1.65E+02
15	1.05E+02
16	2.85E+02
17	1.05E+02
18	3.00E+02
19	3.00E+02
20	3.00E+02
21	1.50E+02
22	3.00E+02
23	3.00E+02
24	3.00E+02
25	3.00E+02
26	3.00E+02
27	6.00E+01
28	9.00E+01
29	3.00E+02
30	3.00E+02
31	3.00E+02
32	1.50E+02
33	3.00E+02
34	2.25E+02
35	6.00E+01
36	7.50E+01
37	3.00E+02
38	1.95E+02
39	2.70E+02
40	3.00E+02
41	1.80E+02
42	2.10E+02
43	3.00E+02
44	1.65E+02
45	3.00E+01
46	1.95E+02
47	3.00E+02
48	3.00E+02
49	1.95E+02
50	3.00E+02
51	3.00E+02
52	2.25E+02
53	1.20E+02
54	2.10E+02
55	3.00E+02
56	4.50E+01
57	7.50E+01
58	3.00E+02
59	7.50E+01
60	3.00E+02
61	6.00E+01
62	3.00E+02
63	1.50E+01
64	4.50E+01
65	3.00E+02
66	2.85E+02
67	7.50E+01
68	4.50E+01
69	3.00E+02
70	3.00E+02
71	9.00E+01
72	3.00E+02
73	7.50E+01
74	1.65E+02
75	3.00E+02
76	6.00E+01
77	1.95E+02
78	6.00E+01
79	1.65E+02
80	7.50E+01
81	3.00E+02
82	7.50E+01
83	3.00E+02
84	3.00E+02
85	3.00E+02
86	3.00E+02
87	3.00E+02
88	3.00E+02
89	3.00E+02
90	3.00E+02
91	3.00E+02
92	3.00E+02
93	3.00E+02
94	3.00E+02
95	3.00E+02
96	3.00E+02
97	1.05E+02
98	3.00E+02
99	6.00E+01
100	3.00E+02
101	1.80E+02
102	3.00E+02
103	3.00E+02
104	3.00E+02
105	3.00E+02
106	3.00E+02
107	3.00E+02
108	6.00E+01
109	1.20E+02
110	3.00E+02
111	9.00E+01
112	6.00E+01
113	4.50E+01
114	6.00E+01
115	3.00E+02
116	7.50E+01
117	3.00E+02
118	4.50E+01
119	4.50E+01
120	3.00E+02
121	1.35E+02
122	4.50E+01
123	1.95E+02
124	3.00E+02
125	1.50E+02
126	3.00E+02
127	1.35E+02
128	4.50E+01
129	1.50E+02
130	3.00E+02
131	3.00E+02
132	1.05E+02
133	3.00E+02
134	2.25E+02
135	1.50E+02
136	3.00E+02
