# Supplementary material for: Polar pattern formation induced by contact following locomotion in a multicellular system
Source: eLife. 2020 Apr 30;9:e53609. doi: 10.7554/eLife.53609 (PMC7213982; doi:10.7554/eLife.53609)
Supplement: Figure 4—source data 2. [file elife-53609-fig4-data2.csv]

N	\tau(s)
1	1.05E+02
2	6.00E+01
3	1.05E+02
4	1.50E+02
5	2.55E+02
6	9.00E+01
7	1.05E+02
8	9.00E+01
9	3.00E+01
10	7.50E+01
11	6.00E+01
12	7.50E+01
13	1.20E+02
14	4.50E+01
15	1.20E+02
16	1.80E+02
17	3.00E+02
18	1.05E+02
19	9.00E+01
20	7.50E+01
21	2.55E+02
22	1.50E+02
23	1.95E+02
24	7.50E+01
25	1.80E+02
26	1.50E+02
27	9.00E+01
28	7.50E+01
29	9.00E+01
30	1.95E+02
31	4.50E+01
32	6.00E+01
33	1.50E+02
34	1.35E+02
35	2.70E+02
36	1.05E+02
37	4.50E+01
38	2.70E+02
39	7.50E+01
40	1.80E+02
41	1.35E+02
42	6.00E+01
43	1.80E+02
44	3.00E+02
45	7.50E+01
46	3.00E+02
47	2.10E+02
48	6.00E+01
49	1.05E+02
50	1.65E+02
51	1.05E+02
52	4.50E+01
53	2.85E+02
54	1.05E+02
55	1.65E+02
56	6.00E+01
57	1.20E+02
58	1.50E+02
59	2.55E+02
60	1.35E+02
61	3.00E+02
62	1.35E+02
63	9.00E+01
64	2.25E+02
65	7.50E+01
66	2.25E+02
67	1.95E+02
68	7.50E+01
69	4.50E+01
70	1.50E+02
71	9.00E+01
72	0.00E+00
73	6.00E+01
74	6.00E+01
75	4.50E+01
76	3.00E+02
77	3.00E+02
78	3.00E+01
79	7.50E+01
80	1.65E+02
81	1.35E+02
82	6.00E+01
83	3.00E+01
84	4.50E+01
85	7.50E+01
86	3.00E+02
87	6.00E+01
88	3.00E+01
89	6.00E+01
90	2.55E+02
91	3.00E+02
92	4.50E+01
93	4.50E+01
94	7.50E+01
95	3.00E+02
96	2.55E+02
97	1.50E+02
98	1.20E+02
99	1.80E+02
100	6.00E+01
101	3.00E+01
102	3.00E+02
103	6.00E+01
104	1.50E+02
105	4.50E+01
106	4.50E+01
107	3.00E+02
108	1.20E+02
109	3.00E+02
110	2.55E+02
111	1.35E+02
112	2.10E+02
113	3.00E+02
114	3.00E+02
115	4.50E+01
116	3.00E+01
117	2.85E+02
118	3.00E+02
119	6.00E+01
120	1.80E+02
121	2.40E+02
122	3.00E+02
123	4.50E+01
124	2.25E+02
125	2.70E+02
126	3.00E+02
127	2.85E+02
128	3.00E+02
129	1.65E+02
130	1.80E+02
131	1.35E+02
132	4.50E+01
133	1.65E+02
134	1.05E+02
135	6.00E+01
136	1.65E+02
137	6.00E+01
138	9.00E+01
139	1.50E+02
140	1.80E+02
141	3.00E+02
142	6.00E+01
143	7.50E+01
144	2.10E+02
145	3.00E+02
146	6.00E+01
147	2.10E+02
148	7.50E+01
149	2.55E+02
150	1.05E+02
151	7.50E+01
152	3.00E+02
153	4.50E+01
154	3.00E+02
155	3.00E+02
156	3.00E+02
